# Supplementary material for: Understanding factors affecting 30-day unplanned readmissions for patients undergoing total knee arthroplasty (TKA): the ACT Transition from Hospital to Home Orthopaedics Survey
Source: PubMed Central journal article supplement — BMJ Open. 2022 Apr 10;12(4):e053831. doi: 10.1136/bmjopen-2021-053831 (PMC9003601; doi:10.1136/bmjopen-2021-053831), 2022-04-10
Supplement: bmjopen-2021-053831.draft_revisions.pdf [file bmjopen-2021-053831.draft_revisions.pdf]

# BMJ Open

BMJ Open is committed to open peer review. As part of this commitment we make the peer review history of every article we publish publicly available.

When an article is published we post the peer reviewers' comments and the authors' responses online. We also post the versions of the paper that were used during peer review. These are the versions that the peer review comments apply to.

The versions of the paper that follow are the versions that were submitted during the peer review process. They are not the versions of record or the final published versions. They should not be cited or distributed as the published version of this manuscript.

BMJ Open is an open access journal and the full, final, typeset and author-corrected version of record of the manuscript is available on our site with no access controls, subscription charges or pay-per-view fees (<http://bmjopen.bmj.com>).

If you have any questions on BMJ Open's open peer review process please email [info.bmjopen@bmj.com](mailto:info.bmjopen@bmj.com)

# BMJ Open

## Understanding Factors affecting 30-day Unplanned Readmissions for Patients undergoing Total Knee Arthroplasty (TKA): The ACT Transition from Hospital to Home Orthopaedics Survey

|                               |                                                                                                                                                                                                                                                                                                                                                                                                                                                                                                                                                                                                                                                                                                                                                                    |
|-------------------------------|--------------------------------------------------------------------------------------------------------------------------------------------------------------------------------------------------------------------------------------------------------------------------------------------------------------------------------------------------------------------------------------------------------------------------------------------------------------------------------------------------------------------------------------------------------------------------------------------------------------------------------------------------------------------------------------------------------------------------------------------------------------------|
| Journal:                      | <i>BMJ Open</i>                                                                                                                                                                                                                                                                                                                                                                                                                                                                                                                                                                                                                                                                                                                                                    |
| Manuscript ID                 | bmjopen-2021-053831                                                                                                                                                                                                                                                                                                                                                                                                                                                                                                                                                                                                                                                                                                                                                |
| Article Type:                 | Original research                                                                                                                                                                                                                                                                                                                                                                                                                                                                                                                                                                                                                                                                                                                                                  |
| Date Submitted by the Author: | 25-May-2021                                                                                                                                                                                                                                                                                                                                                                                                                                                                                                                                                                                                                                                                                                                                                        |
| Complete List of Authors:     | Chabbra, Madhur; Australian National University, Health Services Research and Policy<br>Perriman, Diana; ACT Health, Trauma & Orthopaedic Research Unit; Australian National University Medical School<br>Phillips, Christine; Australian National University Medical School<br>Parkinson, Anne; Australian National University, Health Services Research and Policy<br>Glasgow, Nicholas; Australian National University Medical School<br>Douglas, Kirsty; Australian National University Medical School<br>Cox, Darlene; Health Care Consumers Association, ACT<br>Smith, Paul; ACT Health, Trauma and Orthopaedic Unit; Australian National University Medical School<br>Desborough, Jane; Australian National University, Health Services Research and Policy |
| Keywords:                     | Knee < ORTHOPAEDIC & TRAUMA SURGERY, Health policy < HEALTH SERVICES ADMINISTRATION & MANAGEMENT, Quality in health care < HEALTH SERVICES ADMINISTRATION & MANAGEMENT                                                                                                                                                                                                                                                                                                                                                                                                                                                                                                                                                                                             |
|                               |                                                                                                                                                                                                                                                                                                                                                                                                                                                                                                                                                                                                                                                                                                                                                                    |

SCHOLARONE™  
Manuscripts

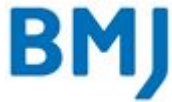

I, the Submitting Author has the right to grant and does grant on behalf of all authors of the Work (as defined in the below author licence), an exclusive licence and/or a non-exclusive licence for contributions from authors who are: i) UK Crown employees; ii) where BMJ has agreed a CC-BY licence shall apply, and/or iii) in accordance with the terms applicable for US Federal Government officers or employees acting as part of their official duties; on a worldwide, perpetual, irrevocable, royalty-free basis to BMJ Publishing Group Ltd ("BMJ") its licensees and where the relevant Journal is co-owned by BMJ to the co-owners of the Journal, to publish the Work in this journal and any other BMJ products and to exploit all rights, as set out in our [licence](#).

The Submitting Author accepts and understands that any supply made under these terms is made by BMJ to the Submitting Author unless you are acting as an employee on behalf of your employer or a postgraduate student of an affiliated institution which is paying any applicable article publishing charge ("APC") for Open Access articles. Where the Submitting Author wishes to make the Work available on an Open Access basis (and intends to pay the relevant APC), the terms of reuse of such Open Access shall be governed by a Creative Commons licence – details of these licences and which [Creative Commons](#) licence will apply to this Work are set out in our licence referred to above.

Other than as permitted in any relevant BMJ Author's Self Archiving Policies, I confirm this Work has not been accepted for publication elsewhere, is not being considered for publication elsewhere and does not duplicate material already published. I confirm all authors consent to publication of this Work and authorise the granting of this licence.

1  
2  
3 1 **Understanding Factors affecting 30-day Unplanned Readmissions for Patients**  
4  
5 2 **undergoing Total Knee Arthroplasty (TKA): The ACT Transition from Hospital to**  
6  
7 3 **Home Orthopaedics Survey**  
8  
9

10 4 **Running title:** Unplanned readmissions following knee arthroplasty  
11  
12

13 5 **Authors:**  
14

15  
16 6 Madhur Chhabra<sup>a</sup>, Diana Perriman<sup>b,c</sup>, Christine Phillips<sup>c</sup>, Anne Parkinson<sup>a</sup>, Nicholas  
17  
18 7 Glasgow<sup>c</sup>, Kirsty Douglas<sup>c</sup>, Darlene Cox<sup>d</sup>, Paul Smith<sup>b,c</sup>, Jane Desborough<sup>a</sup>.  
19  
20

21 8 **Listed author contributions:**  
22

23  
24  
25 9 Madhur Chhabra<sup>a</sup>: data collection, analysis, drafting and finalising of manuscript;  
26

27  
28 10 Diana Perriman<sup>b,c</sup>: data collection and analysis, significant contributions to final manuscript,  
29

30 11 Christine Phillips<sup>c</sup>: survey development, significant contributions to final manuscript  
31

32  
33 12 Anne Parkinson<sup>a</sup>: data collection, significant contributions to final manuscript,  
34

35  
36 13 Nicholas Glasgow<sup>c</sup>: survey development, significant contributions to final manuscript;  
37

38  
39 14 Kirsty Douglas<sup>c</sup>: survey development, significant contributions to final manuscript;  
40

41  
42 15 Darlene Cox<sup>d</sup>: survey development, contributions to final manuscript;  
43

44  
45 16 Paul Smith<sup>b,c</sup>: survey development, significant contributions to final manuscript,  
46

47  
48 17 Jane Desborough<sup>a</sup>: study conception and survey design, data collection, supervised data  
49  
50 18 analysis, significant contributions to final manuscript.  
51

52  
53 19 **Listed author affiliations:**  
54  
55  
56  
57  
58  
59  
60

- 1  
2  
3 20 a. Department of Health Services, Research and Policy, Research School of Population  
4  
5 21 Health, College of Health and Medicine, Australian National University, Canberra, ACT,  
6  
7 22 Australia  
8  
9  
10 23 b. Trauma and Orthopaedic Research Unit, ACT Health  
11  
12  
13 24 c. Australian National University Medical School, College of Health and Medicine,  
14  
15 25 Australian National University, Canberra, Australian Capital Territory (ACT), Australia  
16  
17  
18 26 d. Health Care Consumers Association, ACT  
19  
20  
21  
22 27 **Corresponding author:** Anne Parkinson [anne.parkinson@anu.edu.au](mailto:anne.parkinson@anu.edu.au)  
23  
24  
25 28 Department of Health Services, Research and Policy, Research School of Population Health,  
26  
27 29 63 Eggleston Road, College of Health and Medicine, Australian National University,  
28  
29 30 Canberra, ACT (2601), Australia  
30  
31  
32 31 **All authors have read and approve the manuscript below**  
33  
34  
35  
36  
37  
38  
39  
40  
41  
42  
43  
44  
45  
46  
47  
48  
49  
50  
51  
52  
53  
54  
55  
56  
57  
58  
59  
60

## 32 **Abstract**

### 33 **Objectives**

34 Unplanned readmissions following total knee arthroplasty (TKA) place financial and  
35 logistical strain on the Australian healthcare system. The aim of this study was to examine  
36 associations between unplanned 30-day readmissions following TKA and patients'  
37 experiences in hospital and in transition to general practice and home.

### 38 **Design, setting and participants**

39 A cross-sectional survey of public and private patients attending a six-week follow-up  
40 appointment after TKA at one of four clinical services in the Australian Capital Territory  
41 (ACT) between 1 February 2018 and 31 January 2019. Multiple logistic regression analyses  
42 were used to estimate the risk of 30-day readmissions.

### 43 **Results**

44 Of the 380 participants who completed the survey (n=380, 54% of TKAs undertaken over the  
45 study period), 4% (n=13) were readmitted within 30 days of discharge. After controlling for  
46 age and sex, public patients were significantly more likely to be readmitted within 30 days  
47 than private patients (OR=6.87, 95% CI: 1.71-27.54, p=0.007). Compared with patients who  
48 did not attend rehabilitation, patients who attended were significantly less likely to have been  
49 readmitted within 30 days (OR=0.17, 95%CI: 0.05-0.59, p=0.006). There were no  
50 associations between post-hospital syndrome or patient enablement and 30-day readmissions  
51 in this study.

### 52 **Conclusion**

1  
2  
3 53 Difference in unplanned readmission rates for public versus private patients may be due to  
4  
5 54 discrepancies in surgical waiting times. Strategies to reduce public hospital waiting times and  
6  
7 55 to mitigate against increasing disablement while waiting for a surgical procedure should be  
8  
9 56 explored. Reasons for non-attendance to post-surgical rehabilitation programs need to be  
10  
11 57 explored and strategies to foster increased participation developed.  
12  
13  
14

15 58 **Keywords:** knee arthroplasty, 30-day readmission, post-hospital syndrome, transitional care,  
16  
17 59 hospital performance.  
18  
19  
20

21 60

## 22 61 **Article summary**

### 23 62 **Strengths and limitations of this study**

- 24 63 • This study is the first to use patient-reported responses to quantify the effect of  
25 64 hospital experience of pain, sleep, and nutrition in unplanned 30-day readmissions.
  - 26 65 • We were able to identify which patients attended or did not attend rehabilitation  
27 66 following total knee arthroplasty.
  - 28 67 • A limitation of this study is that results were based on self-reports with no capacity  
29 68 to link them to hospital records for confirmation.
  - 30 69 • As the Australian Capital Territory has a high socioeconomic demographic the  
31 70 findings may not apply to other less affluent areas.
- 32  
33  
34  
35  
36  
37  
38  
39  
40  
41  
42  
43  
44  
45  
46  
47  
48  
49  
50  
51  
52  
53  
54  
55  
56  
57  
58  
59  
60

## 71 **Introduction**

72 Unplanned readmission rates are an indicator of health system performance [1, 2]. The rate of  
73 unplanned 30-day readmission for total knee arthroplasty (TKA) in Australian public  
74 hospitals was 2.6% in 2017-18 [3]. In the United States, readmission rates have been used as  
75 an incentive to reduce readmission and drive improved practice [4]. While there is no such  
76 program in Australia, the economic burden of unplanned readmissions makes it a policy  
77 priority [3, 5, 6].

78 TKAs are conducted in both private and public sectors in Australia with 69% of knee  
79 arthroplasties being conducted in the private sector. The rate of knee replacement surgery has  
80 more than doubled over the past 15 years both in Australia and internationally [7] with the  
81 highest rate of increase seen in the private sector [3, 5, 8]. This growing demand has placed  
82 increased logistical and financial strain on the healthcare system [5]. This increase is not  
83 entirely explained by the ageing populations and a higher prevalence of obesity [7]. It is  
84 suggested that the growth in utilization is due to expansion of the eligibility criteria for knee  
85 replacement surgery [9], and injury patterns among younger people [7].

86 The most common condition-related causes of unplanned readmission following a total knee  
87 arthroplasty (TKA) are surgical-site infection, arthrofibrosis, cellulitis, concomitant co-  
88 morbidities, and fluid and electrolyte imbalance [10]. Other factors such as old age, revision  
89 procedure and increased length of hospital stay also increase the risk of unplanned 30-day  
90 readmissions [10]. However, factors related to the hospital stay itself have also been  
91 identified as important modifiable influences on post-admission outcomes [11].

92 Krumholz [12] describes post-hospital syndrome as a period of vulnerability after discharge  
93 from the hospital which leaves a patient at increased risk of re-hospitalization from  
94 conditions which are often unrelated to the original reason for of admission. It is proposed



1  
2  
3 95 that this acquired transient state might be due to patients' experiences of pain, sleep  
4  
5 96 deprivation, and poor nutrition during their hospital stay [12]. This hypothesis is supported by  
6  
7 97 evidence that increasing patient capacity for self-care is effective at reducing 30-day  
8  
9 98 readmissions [11].  
10

11  
12  
13 99 Research examining unplanned 30-day readmissions describes associations between patients'  
14  
15 100 clinical and demographic characteristics [13, 14], a lack of access to, continuity and  
16  
17 101 regularity of primary care [15-17], and deficits in hospital discharge planning, which often  
18  
19 102 focus on knowledge provision rather than patients' capacity to implement this knowledge  
20  
21 103 [11].  
22  
23  
24

25 104 The patient-enablement instrument is a tool used to measure a person's knowledge and  
26  
27 105 understanding of their health condition; confidence to manage their condition, health, and life  
28  
29 106 [18]; and their ability to source appropriate healthcare for their individual needs. While this  
30  
31 107 measure has largely been examined in primary-care settings, its role in preventing unplanned  
32  
33 108 hospital readmissions has not yet been explored.  
34  
35  
36

37 109 The purpose of this study was to investigate factors associated with unplanned 30-day  
38  
39 110 readmissions following a TKA, including aspects of hospital experiences, patient enablement,  
40  
41 111 and transition from hospital to home.  
42  
43  
44

## 45 112 **Methods**

46  
47 113

### 48 49 114 **Study population**

50  
51 115

52  
53  
54  
55 116 Consecutive patients over the age of 16 years, attending a six-week follow-up appointment  
56  
57 117 after undergoing total knee arthroplasty at one of four private and public clinical services  
58  
59 118 between 1 February 2018 and 31 January 2019.  
60

1  
2  
3 **119 Study design**  
4

5  
6 **120**

7  
8 **121** A cross-sectional survey was conducted in the Australian Capital Territory (ACT) between 1  
9  
10 **122** February 2018 and 31 January 2019 at all private and public sites delivering lower limb joint  
11  
12 **123** replacement services. The responses for patients having undergone TKA are presented in this  
13  
14 **124** paper.  
15  
16

17  
18 **125**

19  
20  
21 **126 Patient and public involvement**  
22

23  
24 **127** Orthopaedic patients (n=5) who had previously had surgery were emailed the survey and  
25  
26 **128** asked to complete it and provide feedback about its readability, length, and meaningfulness.  
27  
28

29  
30 **129**

31  
32 **130 Instrument**  
33

34  
35 **131**

36  
37 **132** Researchers at the Australian National University, Canberra Hospital, Academic Unit of  
38  
39 **133** General Practice ACT Health, Health Care Consumer Association, and Capital Health  
40  
41 **134** Network developed *The ACT Transition from Hospital to Home Survey*. The 50-item survey  
42  
43 **135** was designed to measure patients' experiences in hospital and transition to home across six  
44  
45 **136** domains: 1. Patient demographic characteristics and co-morbidities; 2. Post-hospital  
46  
47 **137** syndrome; 3. Medication enablement; 4. Patient enablement; 5. Transition to general practice;  
48  
49 **138** and 6. Pre- and post-hospital information and pre-/post-surgical rehabilitation  
50  
51  
52 **139** Co-morbidities: Morbidity was assessed with the 18-item Functional Comorbidity Index  
53  
54  
55 **140** which is used to predict functional status rather than mortality [19].  
56  
57  
58  
59  
60

1  
2  
3 141 Post-hospital syndrome: Fifteen items within three domains covering patients' experiences of  
4  
5 142 sleep, pain, and diet in hospital were designed to measure post-hospital syndrome.

7  
8 143 Medication enablement: Three items measured medication enablement in terms of patients'  
9  
10 144 knowledge and ability to manage their medications following discussions with health care  
11  
12 145 providers derived from a previous study in general practice nurse consultations [20].

13  
14  
15 146 Patient enablement: This is the internationally validated six-item Patient Enablement  
16  
17 147 Instrument [21] used internationally in primary-care research.

18  
19  
20 148 Transition to general practice: 10-items assessing patients' relationships with their general  
21  
22 149 practitioner (GP) in terms of continuity of care, regularity of care, healthcare planning,  
23  
24 150 patients' understanding of when to see their GP following discharge, and access to care.

25  
26 151 Interaction with the recommended rehabilitation program: Referral and attendance to  
27  
28 152 physiotherapy rehabilitation post-discharge was examined with one item.

29  
30  
31  
32  
33 153

34  
35  
36 154 **Data collection**

37  
38  
39  
40 155

41  
42  
43 156 The paper surveys were distributed by reception staff at patients' six-week post-operative  
44  
45 157 consultation. Staff were given a protocol and suggested wording to use when providing the  
46  
47 158 survey. An information sheet about the study was provided to patients and anonymity  
48  
49 159 guaranteed. This ensured that patients understood that participation or non-participation did  
50  
51 160 not affect the care they received and that completed surveys were confidential to clinic staff.  
52  
53 161 Surveys were deposited in a sealed box in the waiting room and collected by the researcher at  
54  
55 162 regular intervals.  
56  
57  
58  
59  
60 163

1  
2  
3 **164 Data analysis**  
4

5  
6 **165**

7  
8 **166** Completed survey data was collated and descriptive and inferential statistics used. Variables  
9  
10 **167** were described using summary statistics and frequencies. Some variables were grouped to  
11  
12 **168** create new variables and others, for example, BMI, were converted to categorical variables  
13  
14 **169** for analysis. The primary outcome of interest was self-reported 30-day readmission to  
15  
16 **170** hospital following discharge, categorized as a binary variable (yes/no). Age, sex, living  
17  
18 **171** situation, country of origin, education, self-rated health, comorbidities, post-hospital  
19  
20 **172** syndrome (experiences of sleep, diet and pain), experiences of family practice (access,  
21  
22 **173** continuity, planning, regularity), medication enablement, and patient enablement were  
23  
24 **174** separate independent variables.  
25  
26  
27  
28

29  
30 **175** An exploratory factor analysis (EFA) with orthogonal varimax rotation was undertaken to  
31  
32 **176** explore the relationship between variables which described post hospital syndrome. The  
33  
34 **177** modes/themes which had an eigenvalue of  $>1$  were retained and the internal consistency of  
35  
36 **178** the modes which emerged was examined using Cronbach's alpha. The suitability of the data  
37  
38 **179** for an EFA was confirmed with a Kaiser-Meyer-Olkin (KMO) criteria and Bartlett test.  
39  
40

41  
42 **180** Prior to analysis, variable independence was established. Ordinal variables were examined  
43  
44 **181** using Spearman's correlation coefficient and categorical variables using the chi squared ( $\chi^2$ )  
45  
46 **182** test and odds ratio. If a strong correlation ( $> 0.6$ ) or a significant association ( $p \leq 0.2$ ) existed  
47  
48 **183** between two eligible variables, only one of these was retained for inclusion in the final  
49  
50 **184** analysis.  
51

52  
53  
54 **185** Univariate logistic regression analysis was conducted for each independent variable and the  
55  
56 **186** dependent variable (unplanned 30-day readmission). Variables with  $p$ -values  $\leq 0.25$  were  
57  
58  
59  
60

1  
2  
3 187 included in the multiple logistic regression analyses. Univariate logistic regression was  
4  
5 188 conducted on each individual comorbidity item, and then for the total comorbidity score.  
6  
7  
8 189 Cronbach's alpha was used to determine the internal reliability of each scale. A value greater  
9  
10 190 than 0.5 was considered as a good indicator of internal consistency.  
11  
12  
13 191 To further eliminate potential confounding, two multiple logistic regression models were run  
14  
15 192 - one including eligible individual variables from within the Functional Comorbidity Index,  
16  
17 193 Medication Enablement questions and the Patient Enablement Instrument; and a second  
18  
19 194 including total scores.  
20  
21  
22  
23 195 The full multiple regression model included eight variables. These were public or private  
24  
25 196 hospital; stroke or transient ischemic attack (TIA); upper gastrointestinal disease; self-rated  
26  
27 197 health; given an information package or checklist before surgery; usual waiting time to see  
28  
29 198 GP; attendance at recommended rehabilitation or physiotherapy; and living status. The  
30  
31 199 reduced model included 'public or private hospital' and 'attendance at recommended  
32  
33 200 rehabilitation or physiotherapy'. Both the models were adjusted for age and sex.  
34  
35  
36  
37 201 Likelihood ratio tests and Hosmer Lemeshow goodness of fit test were used to check the fit  
38  
39 202 of the final model. The Receiver Operator Curve (ROC) was plotted to check the specificity  
40  
41 203 and sensitivity of the predicted model.  
42  
43  
44  
45 204 Stata/IC 15.1 (StataCorp LLC, Texas, USA) was used to perform all statistical analyses [22].  
46  
47  
48  
49  
50

## 51 206 **Missing data**

52  
53  
54 207  
55  
56  
57  
58  
59  
60

1  
2  
3 208 The criteria used for acceptability of non-response to survey questions was 10% or lower [23-  
4  
5 209 25]. Missing data for individual variables within the medication and patient enablement  
6  
7 210 scales were imputed to equal the median value of non-missing data [26-29].  
8  
9

## 10 211 **Ethical approval**

11  
12  
13 212

14  
15  
16 213 Ethical approval was obtained from the ACT Health (ETHLR.17.207), Calvary Healthcare  
17  
18 214 Bruce (45-2017) and the Australian National University (2017/798) Human Research Ethics  
19  
20 215 Committees.  
21  
22

## 23 216 **Results**

24  
25 217 Of the 1069 people invited to participate, 827 (77%) completed the survey.  
26  
27

28  
29 218 Of all surgeries, 380 received a total knee arthroplasty and of these 13 were readmitted within  
30  
31 219 30 days. Participant demographics are presented in Table 1. Private patients accounted for  
32  
33 220 65% of the total population (247 private patients, 133 public patients). This represented 44%  
34  
35 221 of all private patients and 96% of all public patients who had a TKA during the study period  
36  
37 222 which represents 54% of all TKAs. 57% of those who underwent knee surgery were females.  
38  
39 223 The mean age was  $67.4 \pm 0.5$  years (age range 44.8 to 91.0 years). Mean BMI was  $31.5 \text{ kg/m}^2$   
40  
41 224 with most having a BMI of  $>30$  (58%). Most participants were non-indigenous (99%). There  
42  
43 225 were three people of Aboriginal and/or Torres Strait Islander origin, none of whom was  
44  
45 226 readmitted. There were proportionally more private patients aged 65-84 years (63%)  
46  
47 227 compared to public (53%), whereas proportionally more public patients were in the 45-64 age  
48  
49 228 group (44% compared to 35%). The proportion of females within the public cohort was  
50  
51 229 greater than private (67% compared to 57%). A higher proportion of public patients lived  
52  
53 230 alone (31% compared to 23%).  
54  
55  
56  
57  
58  
59  
60

### 232 **Post-hospital syndrome exploratory factor analysis (EFA)**

233

234 Three modes/themes with acceptable internal consistency emerged. First, diet, which was  
235 described by responses to two questions: “Did you feel your dietary requirements were met in  
236 hospital?” and “Overall, how would you rate the quality of the food in hospital?” The second  
237 theme was pain, which was also explained by two questions: “How would you describe the  
238 general level of pain you experienced?” and “When you left hospital, how would you rate  
239 your pain out of 10?” The third was sleep which was explained by “Did you feel well rested  
240 when you left the hospital?” and “How would you rate the quality of sleep in the hospital?”

241 Floor and ceiling effects were observed for patient enablement due to a large number of  
242 participants reporting being either fully enabled or not enabled at all. To address this, the  
243 variable was dichotomised around the mean where ‘less enabled’ was  $\leq 6.5$  and ‘more  
244 enabled’ was  $> 6.5$  in line with previous studies using this instrument [28, 30]. Sixty percent  
245 of participants (n=212/357) reported that they were less enabled to manage their health after  
246 their stay in the hospital.

247

### 248 **Multiple logistic regression analysis**

249

250 Nine variables were eligible for inclusion in the multiple logistic regression analysis. Of  
251 these, ‘public /private status’ and ‘rehabilitation attendance’ were retained for the reduced  
252 model as they were the only variables to retain significance after stepwise removal of the  
253 other variables in the full model.

254 After controlling for age and sex, public patients were significantly more likely to be  
255 readmitted within 30 days compared to private patients (OR=6.87, 95% CI:1.71-27.54,  
12

1  
2  
3 256 p=0.007), and patients who did not attend rehabilitation were significantly less likely to be  
4  
5 257 readmitted within 30 days of discharge than those who did (OR=0.17, 95% CI: 0.05-0.59,  
6  
7 258 p=0.006).  
9

10  
11 259

## 13 260 **Discussion**

15  
16 261

17  
18  
19 262 The aim of this study was to investigate factors impacting unplanned 30-day readmission in  
20  
21 263 TKA patients. Of the 4% of patients who had an unplanned readmission, those who attended  
22  
23 264 public hospitals and those who did not attend a rehabilitation program were more likely to be  
24  
25 265 readmitted to hospital within 30 days of discharge.

26  
27  
28  
29 266 While the United States also has a similar 4% readmission rate following TKA [10, 31-33],  
30  
31 267 this is higher than that reported by the Australian Institute of Health and Welfare (AIHW) [3].  
32  
33 268 However, our results may reflect the true readmission rate more accurately as the AIHW only  
34  
35 269 reports public hospital data and the majority of TKAs in Australia are performed in the  
36  
37 270 private sector.

38  
39  
40  
41 271 In our study, public patients were more likely to be readmitted within 30 days as compared to  
42  
43 272 private patients. The majority of respondents (65%) had their TKA in the private sector,  
44  
45 273 consistent with the higher proportion (80%) of TKA procedures performed in the private  
46  
47 274 sector in the ACT [34]. Our study has almost complete ascertainment from the public sector,  
48  
49 275 and reasonable ascertainment from the private sector, supporting the robustness of our  
50  
51 276 findings. The increased likelihood of readmission for public patients might be explained by  
52  
53 277 several contributing factors such as socioeconomic status, longer waiting times and increased  
54  
55 278 disease complexity [35-40]. The median waiting time for a TKA in 2018-19 in the ACT  
56  
57 279 public hospital system was 62 days with 8.2% of patients waiting more than 365 days [35].  
58  
59  
60



1  
2  
3 280 On the other hand, the median waiting time for Australian private patients was just 67 days  
4  
5 281 during the same period [2, 41]. Therefore, waiting time may be an important mediating  
6  
7 282 factor.

8  
9  
10  
11 283 Patients who have had to wait longer constitute 1.2% of all unplanned 30-day readmissions  
12  
13 284 for elective surgical procedures in Australia [42]. TKA patients who waited longer than six  
14  
15 285 months have been described as having significantly worse function and quality of life scores,  
16  
17 286 as well as dissatisfaction rates which were mainly influenced by pre-operative anxiety and  
18  
19 287 depression [43]. It is important to understand that surgical waiting times are only part of the  
20  
21 288 waiting journey for patients in the public system. The mean waiting times recorded for  
22  
23 289 Australian patients do not take into account the lengthy process of referral, specialist  
24  
25 290 assessment and investigation [44]. Addressing long waiting lists by utilising non-surgical  
26  
27 291 exercise and education programs are increasingly being implemented and the evidence for  
28  
29 292 efficacy is strong [45, 46].

30  
31  
32  
33  
34  
35 293 In our study, patients who attended rehabilitation were less likely to be readmitted within 30  
36  
37 294 days than those who did not. Previous research indicates that private patients are more likely  
38  
39 295 to attend rehabilitation than public patients [47] and that rehabilitation is associated with  
40  
41 296 better physical function after TKA [45]. However, we found no significant relationship  
42  
43 297 between being a public or private patient and attendance at rehabilitation. Both groups in our  
44  
45 298 sample had similar rehabilitation opportunities, except for the provision of hydrotherapy after  
46  
47 299 six weeks indicating that private/public status was not a mediating factor for this finding.

48  
49  
50  
51 300 This study showed no significant associations between general practice (GP) factors and  
52  
53 301 unplanned 30-day readmissions. A recent study reported that timely and regular GP contact  
54  
55 302 during the two years following transition from hospital to community care lowered the risk of  
56  
57 303 emergency readmission to hospital in patients with cardiovascular disease [48]. However, our  
58  
59  
60

1  
2  
3 304 results might reflect the nature of the health condition. This cohort included people having  
4  
5 305 TKA as a treatment for severe pain for arthritis of the knee, which is quite different to other  
6  
7 306 diseases in that the treatment is potentially definitive and is followed up by the surgeon.  
8  
9  
10 307 Although more than half of the patients who were readmitted had high scores for post-  
11  
12 308 hospital syndrome, there was no significant association with 30-day readmission. The  
13  
14 309 hypothesis of post-hospital syndrome describes a transient state resulting in consequences,  
15  
16 310 including a higher risk of readmission [12]. Brownlee et al. [49] found that post-hospital  
17  
18 311 syndrome was an independent predictor of readmission within 30 days of discharge in a large  
19  
20 312 cohort of surgical patients. While other studies have attempted to determine the impact of  
21  
22 313 post-hospital syndrome through linked hospital records data, [49, 50] this study is the first to  
23  
24 314 use patient-reported responses to quantify the effect of hospital experience (of pain, sleep,  
25  
26 315 and nutrition) on unplanned 30-day readmissions.  
27  
28  
29 316 There are limitations to this study. The main limitation was that there were fewer  
30  
31 317 readmissions than anticipated and the study may have been insufficiently powered for  
32  
33 318 detecting the associations being tested. The results were based on anonymous self-reports;  
34  
35 319 hence there was no capacity to link them to hospital data to establish actual readmission time  
36  
37 320 frames, length of hospital stay, reasons for readmission or previous admission history.  
38  
39 321 However, our primary endpoint was 30-day readmission and we believe that the self-reported  
40  
41 322 data was accurate. The response rate is only an estimation based on joint replacement activity  
42  
43 323 in the ACT. It assumes that all patients returning for their six-week follow-up appointment  
44  
45 324 were invited to participate. We do not know whether the reception staff invited all patients, or  
46  
47 325 only some. Also, as the ACT has a relatively high socioeconomic demographic the findings  
48  
49 326 from this study may not apply to other less affluent areas.  
50  
51  
52  
53  
54  
55  
56  
57  
58  
59  
60

1  
2  
3 327 Our data do not allow us to understand why rehabilitation was not accessed. It is possible that  
4  
5 328 patients who were frailer did not feel able to participate and perhaps they were the patients  
6  
7 329 who were readmitted. However, a range of patient and provider-based factors have been  
8  
9  
10 330 recognized as affecting the rehabilitation pathway chosen by patients, such as pre-operative  
11  
12 331 preferences, previous experiences, perceived benefits, clinical status post-surgery, as well as  
13  
14 332 insurance provider and hospital business model [51]. This association needs clarification.

15  
16  
17 333 It is not known if the rate of readmission can be reduced given the significant comorbidities  
18  
19 334 of the TKA patient sample.

20  
21  
22  
23 335

## 24 25 26 336 **Conclusion**

27  
28 337

29  
30  
31 338 This study was undertaken to explore the factors impacting unplanned 30-day readmission  
32  
33 339 after TKA. These results have implications for policy and for practice. An over-  
34  
35 340 representation of public patients in the readmitted cohort is important. It is probable that the  
36  
37 341 extended periods of delay to surgery among patients on the public waiting list may be an  
38  
39 342 important factor. Therefore, it is essential to shorten waiting times and prioritize medical  
40  
41 343 need when dealing with public patients. Clinicians should also place emphasis on the  
42  
43 344 importance of attending rehabilitation after a TKA as an effective way to reduce 30-day  
44  
45 345 readmission. Further investigation of how the pre-surgical patient journey can be better  
46  
47 346 optimised to reduce readmission rates is warranted.

48  
49  
50  
51  
52 347

1  
2  
3 348 **Acknowledgement**  
4

5  
6 349 We wish to thank Orthopaedics ACT and Dr Michael Gross from Canberra Hip and Knee  
7

8 350 Replacement for their support with this project.  
9

10  
11 351 **Funding**  
12

13  
14 352 This project was funded by the Australian National University  
15

16 353  
17

18  
19 354  
20  
21  
22  
23  
24  
25  
26  
27  
28  
29  
30  
31  
32  
33  
34  
35  
36  
37  
38  
39  
40  
41  
42  
43  
44  
45  
46  
47  
48  
49  
50  
51  
52  
53  
54  
55  
56  
57  
58  
59  
60

For peer review only

**References**

- [1]. Bureau of Health Information. Spotlight on Measurement: Return to acute care following hospitalisation, Spotlight on Readmissions Sydney (NSW); BHI; 2015.,.
- [2]. Dixit SK, Sambasivan M. A review of the Australian healthcare system: A policy perspective. *SAGE Open Medicine*. 2018;6:2050312118769211 DOI: 10.1177/2050312118769211.
- [3]. Australian Institute of Health and Welfare 2019. Admitted patient care 2017–18: Australian hospital statistics. Health services series no. 90. Cat. no. HSE 225. Canberra: AIHW.
- [4]. McIlvennan CK, Eapen ZJ, Allen LA. Hospital readmissions reduction program. *Circulation*. 2015;131(20):1796-803 DOI: 10.1161/CIRCULATIONAHA.114.010270.
- [5]. Ackerman IN, Bohensky MA, Zomer E, Tacey M, Gorelik A, Brand CA, et al. The projected burden of primary total knee and hip replacement for osteoarthritis in Australia to the year 2030. *BMC musculoskeletal disorders*. 2019;20(1):90- DOI: 10.1186/s12891-019-2411-9.
- [6]. Benbassat J, Taragin M. Hospital Readmissions as a Measure of Quality of Health Care: Advantages and Limitations. *Archives of Internal Medicine*. 2000;160(8):1074-81 DOI: 10.1001/archinte.160.8.1074.
- [7]. Losina E, Thornhill TS, Rome BN, Wright J, Katz JN. The dramatic increase in total knee replacement utilization rates in the United States cannot be fully explained by growth in population size and the obesity epidemic. *J Bone Joint Surg Am*. 2012;94(3):201-7 DOI: 10.2106/jbjs.J.01958.
- [8]. Private Healthcare Australia. Pre-Budget submission 2017–18. 19 Jan 2017. [https://static.treasury.gov.au/uploads/sites/1/2017/06/C2016-052\\_Private-Healthcare-Australia.pdf](https://static.treasury.gov.au/uploads/sites/1/2017/06/C2016-052_Private-Healthcare-Australia.pdf) (viewed 4 June 2020).

- 1  
2  
3 380 [9]. Riddle DL, Jiranek WA, Hayes CW. Use of a validated algorithm to judge the  
4  
5 381 appropriateness of total knee arthroplasty in the United States: a multicenter longitudinal  
6  
7 382 cohort study. *Arthritis Rheumatol.* 2014 Aug;66(8):2134-43. doi: 10.1002/art.38685. PMID:  
8  
9 383 24974958; PMCID: PMC4190177.
- 10  
11  
12 384 [10]. Schairer WW, Vail TP, Bozic KJ. What are the rates and causes of hospital  
13  
14 385 readmission after total knee arthroplasty? *Clinical orthopaedics and related research.*  
15  
16 386 2014;472(1):181-7 DOI: 10.1007/s11999-013-3030-7.
- 17  
18  
19 387 [11]. Leppin AL, Gionfriddo MR, Kessler M, Brito JP, Mair FS, Gallacher K, et al.  
20  
21 388 Preventing 30-day hospital readmissions: a systematic review and meta-analysis of  
22  
23 389 randomized trials. *JAMA internal medicine.* 2014;174(7):1095-107 DOI:  
24  
25 390 10.1001/jamainternmed.2014.1608.
- 26  
27  
28 391 [12]. Krumholz HM. Post-hospital syndrome--an acquired, transient condition of  
29  
30 392 generalized risk. *The New England journal of medicine.* 2013;368(2):100-2 DOI:  
31  
32 393 10.1056/NEJMp1212324.
- 33  
34  
35 394 [13]. Falster MO, Jorm LR, Douglas KA, Blyth FM, Elliott RF, Leyland AH.  
36  
37 395 Sociodemographic and health characteristics, rather than primary care supply, are major  
38  
39 396 drivers of geographic variation in preventable hospitalizations in Australia. *Med Care.*  
40  
41 397 2015;53(5):436-45 DOI: 10.1097/mlr.0000000000000342.
- 42  
43  
44 398 [14]. Kossovsky MP, Sarasin FP, Perneger TV, Chopard P, Sigaud P, Gaspoz J. Unplanned  
45  
46 399 readmissions of patients with congestive heart failure: do they reflect in-hospital quality of  
47  
48 400 care or patient characteristics? *Am J Med.* 2000;109(5):386-90 DOI: 10.1016/s0002-  
49  
50 401 9343(00)00489-7.
- 51  
52  
53 402 [15]. Einarsdóttir K, Preen DB, Emery JD, Kelman C, Holman CD. Regular primary care  
54  
55 403 lowers hospitalisation risk and mortality in seniors with chronic respiratory diseases. *J Gen*  
56  
57 404 *Intern Med.* 2010;25(8):766-73 DOI: 10.1007/s11606-010-1361-6.
- 58  
59  
60

- 1  
2  
3 405 [16]. Cree M, Bell NR, Johnson D, Carriere KC. Increased continuity of care associated  
4  
5 406 with decreased hospital care and emergency department visits for patients with asthma. *Dis*  
6  
7 407 *Manag.* 2006;9(1):63-71 DOI: 10.1089/dis.2006.9.63.
- 8  
9  
10 408 [17]. Tsai CL, Griswold SK, Clark S, Camargo CA, Jr. Factors associated with frequency  
11  
12 409 of emergency department visits for chronic obstructive pulmonary disease exacerbation. *J*  
13  
14 410 *Gen Intern Med.* 2007;22(6):799-804 DOI: 10.1007/s11606-007-0191-7.
- 15  
16  
17 411 [18]. Howie JG, Heaney DJ, Maxwell M, Walker JJ. A comparison of a Patient Enablement  
18  
19 412 Instrument (PEI) against two established satisfaction scales as an outcome measure of  
20  
21 413 primary care consultations. *Fam Pract.* 1998;15(2):165-71 DOI: 10.1093/fampra/15.2.165.
- 22  
23  
24 414 [19]. Groll DL, To T, Bombardier C, Wright JG. The development of a comorbidity index  
25  
26 415 with physical function as the outcome. *Journal of Clinical Epidemiology.* 2005;58(6):595-602  
27  
28 416 DOI: <https://doi.org/10.1016/j.jclinepi.2004.10.018>.
- 29  
30  
31 417 [20]. Desborough J, Banfield M, Phillips C, Mills J. The process of patient enablement in  
32  
33 418 general practice nurse consultations: a grounded theory study. *Journal of Advanced Nursing.*  
34  
35 419 2017;73(5):1085-96 DOI: 10.1111/jan.13199.
- 36  
37  
38 420 [21]. Hudon C, Fortin M, Rossignol F, Bernier S, Poitras M-E. The Patient Enablement  
39  
40 421 Instrument-French version in a family practice setting: a reliability study. *BMC family*  
41  
42 422 *practice.* 2011;12:71- DOI: 10.1186/1471-2296-12-71.
- 43  
44  
45 423 [22]. StataCorp. 2019. *Stata Statistical Software: Release 16.* College Station, TX:  
46  
47 424 StataCorp LLC.
- 48  
49 425 [23]. Foss AJE, Lamping DL, Schroter S, Hungerford J. Development and validation of a  
50  
51 426 patient based measure of outcome in ocular melanoma. *British Journal of Ophthalmology.*  
52  
53 427 2000;84(4):347 DOI: 10.1136/bjo.84.4.347.
- 54  
55  
56 428 [24]. Desborough J, Bagheri N, Banfield M, Mills J, Phillips C, Korda R. The impact of  
57  
58 429 general practice nursing care on patient satisfaction and enablement in Australia: A mixed  
59  
60

- 1  
2  
3 430 methods study. *International Journal of Nursing Studies*. 2016;64:108-19 DOI:  
4  
5 431 <https://doi.org/10.1016/j.ijnurstu.2016.10.004>.  
6  
7 432 [25]. Bowling A. *Research methods in health: investigating health and health services*:  
8  
9 McGraw-hill education (UK); 2014.  
10 433  
11  
12 434 [26]. Mercer SW, Jani BD, Maxwell M, Wong SYS, Watt GCM. Patient enablement  
13  
14 435 requires physician empathy: a cross-sectional study of general practice consultations in areas  
15  
16 436 of high and low socioeconomic deprivation in Scotland. *BMC family practice*. 2012;13:6-  
17  
18 437 DOI: 10.1186/1471-2296-13-6.  
19  
20 438 [27]. Desborough J, Bagheri N, Banfield M, Mills J, Phillips C, Korda R. The impact of  
21  
22 439 general practice nursing care on patient satisfaction and enablement in Australia: A mixed  
23  
24 440 methods study. *International journal of nursing studies*. 2016;64:108-19 DOI:  
25  
26 441 10.1016/j.ijnurstu.2016.10.004.  
27  
28 442 [28]. Mercer SW, Jani BD, Maxwell M, Wong SY, Watt GC. Patient enablement requires  
29  
30 443 physician empathy: a cross-sectional study of general practice consultations in areas of high  
31  
32 444 and low socioeconomic deprivation in Scotland. *BMC Family Practice*. 2012;13(1):6 DOI:  
33  
34 445 10.1186/1471-2296-13-6.  
35  
36 446 [29]. Mercer SW, Neumann M, Wirtz M, Fitzpatrick B, Vojt G. General practitioner  
37  
38 447 empathy, patient enablement, and patient-reported outcomes in primary care in an area of  
39  
40 448 high socio-economic deprivation in Scotland--a pilot prospective study using structural  
41  
42 449 equation modeling. *Patient Educ Couns*. 2008;73(2):240-5 DOI: 10.1016/j.pec.2008.07.022.  
43  
44 450 [30]. Desborough J, Banfield M, Parker R. A tool to evaluate patients' experiences of  
45  
46 451 nursing care in Australian general practice: development of the Patient Enablement and  
47  
48 452 Satisfaction Survey. *Aust J Prim Health*. 2014;20(2):209-15 DOI: 10.1071/py12121.  
49  
50  
51  
52  
53  
54  
55  
56  
57  
58  
59  
60



- 1  
2  
3 453 [31]. Australian Commission on Safety and Quality in Health Care. Avoidable Hospital  
4  
5 454 Readmissions: Report on Australian and International indicators, their use and the efficacy of  
6  
7 455 interventions to reduce readmissions. Sydney: ACSQHC; 2019.
- 8  
9  
10 456 [32]. Cram P, Lu X, Kates SL, Singh JA, Li Y, Wolf BR. Total knee arthroplasty volume,  
11  
12 457 utilization, and outcomes among Medicare beneficiaries, 1991-2010. JAMA.  
13  
14 458 2012;308(12):1227-36 DOI: 10.1001/2012.jama.11153.
- 15  
16  
17 459 [33]. Brown NM, Sheth NP, Davis K, Berend ME, Lombardi AV, Berend KR, et al. Total  
18  
19 460 Knee Arthroplasty Has Higher Postoperative Morbidity Than Unicompartmental Knee  
20  
21 461 Arthroplasty: A Multicenter Analysis. The Journal of Arthroplasty. 2012;27(8,  
22  
23 462 Supplement):86-90 DOI: <https://doi.org/10.1016/j.arth.2012.03.022>.
- 24  
25  
26 463 [34]. Pawlikowska TRB, Nowak PR, Szumilo-Grzesik W, Walker JJ. Primary care reform:  
27  
28 464 a pilot study to test the evaluative potential of the Patient Enablement Instrument in Poland.  
29  
30 465 Family Practice. 2002;19(2):197-201 DOI: 10.1093/fampra/19.2.197.
- 31  
32  
33 466 [35]. Australian Institute of Health and Welfare, 2018, My Hospitals website available at:  
34  
35 467 [https://www.myhospitals.gov.au/hospital/810000082/the-canberra-hospital/waiting-times-](https://www.myhospitals.gov.au/hospital/810000082/the-canberra-hospital/waiting-times-elective-surgery-intended-procedure)  
36  
37 468 [elective-surgery-intended-procedure](https://www.myhospitals.gov.au/hospital/810000082/the-canberra-hospital/waiting-times-elective-surgery-intended-procedure).
- 38  
39  
40 469 [36]. Brennan SL, Lane SE, Lorimer M, Buchbinder R, Wluka AE, Page RS, et al.  
41  
42 470 Associations between socioeconomic status and primary total knee joint replacements  
43  
44 471 performed for osteoarthritis across Australia 2003–10: data from the Australian Orthopaedic  
45  
46 472 Association National Joint Replacement Registry. BMC Musculoskeletal Disorders.  
47  
48 473 2014;15(1):356 DOI: 10.1186/1471-2474-15-356.
- 49  
50  
51 474 [37]. Desmeules F, Dionne CE, Belzile É L, Bourbonnais R, Frémont P. The impacts of  
52  
53 475 pre-surgery wait for total knee replacement on pain, function and health-related quality of life  
54  
55 476 six months after surgery. J Eval Clin Pract. 2012;18(1):111-20 DOI: 10.1111/j.1365-  
56  
57 477 2753.2010.01541.x.
- 58  
59  
60

- 1  
2  
3 478 [38]. Desmeules F, Dionne CE, Belzile E, Bourbonnais R, Frémont P. The burden of wait  
4  
5 479 for knee replacement surgery: effects on pain, function and health-related quality of life at the  
6  
7 480 time of surgery. *Rheumatology (Oxford)*. 2010;49(5):945-54 DOI:  
8  
9 481 10.1093/rheumatology/kep469.  
10  
11  
12 482 [39]. Keeney BJ, Koenig KM, Paddock NG, Moschetti WE, Sparks MB, Jevsevar DS. Do  
13  
14 483 Aggregate Socioeconomic Status Factors Predict Outcomes for Total Knee Arthroplasty in a  
15  
16 484 Rural Population? *The Journal of Arthroplasty*. 2017;32(12):3583-90 DOI:  
17  
18 485 10.1016/j.arth.2017.07.002.  
19  
20  
21 486 [40]. McCormack R, Michels R, Ramos N, Hutzler L, Slover JD, Bosco JA. Thirty-day  
22  
23 487 readmission rates as a measure of quality: causes of readmission after orthopedic surgeries  
24  
25 488 and accuracy of administrative data. *J Healthc Manag*. 2013;58(1):64-76; discussion -7.  
26  
27  
28 489 [41]. Australian Institute of Health and Welfare 2017. Admitted patient care 2015–16:  
29  
30 490 Australian hospital statistics. Health services series no.75. Cat. no. HSE 185. Canberra:  
31  
32 491 AIHW.  
33  
34  
35 492 [42]. Australian Institute of Health and Welfare 2018. Elective surgery waiting times 2017–  
36  
37 493 18: Australian hospital statistics. Health services series no. 88. Cat. no. HSE 215. Canberra:  
38  
39 494 AIHW.  
40  
41  
42 495 [43]. Lizaur-Utrilla A, Martinez-Mendez D, Miralles-Muñoz FA, Marco-Gomez L, Lopez-  
43  
44 496 Prats FA. Negative impact of waiting time for primary total knee arthroplasty on satisfaction  
45  
46 497 and patient-reported outcome. *International Orthopaedics*. 2016;40(11):2303-7 DOI:  
47  
48 498 10.1007/s00264-016-3209-0.  
49  
50  
51 499 [44]. Curtis AJ, Russell COH, Stoelwinder JU, McNeil JJ. Waiting lists and elective  
52  
53 500 surgery: ordering the queue. *Medical Journal of Australia*. 2010;192(4):217-20 DOI:  
54  
55 501 10.5694/j.1326-5377.2010.tb03482.x.  
56  
57  
58  
59  
60

- 1  
2  
3 502 [45]. Skou ST, Roos EM. Good Life with osteoArthritis in Denmark (GLA:D™): evidence-  
4  
5 503 based education and supervised neuromuscular exercise delivered by certified  
6  
7 504 physiotherapists nationwide. *BMC Musculoskelet Disord*. 2017;18(1):72 DOI:  
8  
9 505 10.1186/s12891-017-1439-y.
- 10  
11  
12 506 [46]. Skou ST, Roos EM, Laursen MB, Rathleff MS, Arendt-Nielsen L, Simonsen O, et al.  
13  
14 507 A Randomized, Controlled Trial of Total Knee Replacement. *New England Journal of*  
15  
16 508 *Medicine*. 2015;373(17):1597-606 DOI: 10.1056/NEJMoa1505467.
- 17  
18  
19 509 [47]. Faux Steven; Shiner CW, Jane; Chia, Karen. Evaluating the role of rehabilitation for  
20  
21 510 lower limb joint replacement, deconditioning and cancer. Sydney: Department of  
22  
23 511 Rehabilitation Medicine, St Vincent's Hospital Sydney, Australia, (APHA) APHA.
- 24  
25  
26 512 [48]. Australian Institute of Health and Welfare 2018. Transition between hospital and  
27  
28 513 community care for patients with coronary heart disease: New South Wales and Victoria,  
29  
30 514 2012–2015. Cat. no. CDK 9. Canberra: AIHW.
- 31  
32  
33 515 [49]. Brownlee SA, Blackwell RH, Blanco BA, Zapf MAC, Kliethermes S, Gupta GN, et  
34  
35 516 al. Impact of Post-Hospital Syndrome on Outcomes Following Elective, Ambulatory Surgery.  
36  
37 517 *Annals of surgery*. 2017;266(2):274-9 DOI: 10.1097/SLA.0000000000001965.
- 38  
39  
40 518 [50]. Sadatsafavi M, Lynd LD, Fitzgerald JM. Post-hospital syndrome in adults with  
41  
42 519 asthma: a case-crossover study. *Allergy, asthma, and clinical immunology : official journal of*  
43  
44 520 *the Canadian Society of Allergy and Clinical Immunology*. 2013;9(1):49- DOI:  
45  
46 521 10.1186/1710-1492-9-49.
- 47  
48  
49  
50 522 [51]. Buhagiar MA, Naylor JM, Simpson G, Harris IA, Kohler F. Understanding consumer  
51  
52 523 and clinician preferences and decision making for rehabilitation following arthroplasty in the  
53  
54 524 private sector. *BMC Health Services Research*. 2017;17(1):415 DOI: 10.1186/s12913-017-  
55  
56 525 2379-9.

1 **Tables**

2

3

4 Table 1. Characteristics of all patients and those with an unplanned 30-day readmission (knee  
5 arthroplasty only).

|                  |                                 | Public | Private | TOTAL  |                       |
|------------------|---------------------------------|--------|---------|--------|-----------------------|
|                  |                                 | N=133  | N=247   | N=380* | Readmission<br>N=13** |
| Age              | 45-64                           | 55     | 79      | 134    | 2                     |
|                  | 65- 84                          | 66     | 145     | 211    | 10                    |
|                  | >85 years                       | 4      | 5       | 9      | 0                     |
| Gender           | Male                            | 42     | 97      | 139    | 3                     |
|                  | Female                          | 86     | 129     | 215    | 10                    |
|                  | Other                           | 0      | 2       | 2      | 0                     |
| Language         | Other than English at<br>e home | 21     | 28      | 49     | 2                     |
|                  | Only speak English              | 108    | 212     | 320    | 11                    |
| Living<br>Status | Live alone                      | 40     | 55      | 95     | 2                     |
|                  | Live with someone               | 90     | 189     | 273    | 11                    |

6 \*Missing values for age: 26, Gender:24, Language: 11, Living status: 12.

7 \*\*Missing value for readmission for age: 1

8

9

10

11

1

12

|                                               | Total observations<br>(n=380) |              | Unplanned 30-day readmission<br>(n=13) |                 |
|-----------------------------------------------|-------------------------------|--------------|----------------------------------------|-----------------|
| Demographic factors                           | No.                           | % (of total) | No.                                    | % (of variable) |
| <i>BMI Calculations</i>                       |                               |              |                                        |                 |
| BMI (Mean)                                    | 31.5                          |              |                                        |                 |
| 18.5-24.4                                     | 31                            | 8.2          | 1                                      | 7.7             |
| 24.5-30                                       | 129                           | 34.0         | 2                                      | 15.4            |
| >30                                           | 220                           | 57.9         | 10                                     | 76.9            |
| Missing                                       | 6                             | 1.6          | -                                      | -               |
| <i>Indigenous status</i>                      |                               |              |                                        |                 |
| Aboriginal                                    | 1                             | 0.3          | 0                                      | 0               |
| Torres Strait Islander                        | 2                             | 0.5          | 0                                      | 0               |
| Both                                          | 0                             | 0            | 0                                      | 0               |
| Neither                                       | 315                           | 82.9         | 13                                     | 100.0           |
| Missing                                       | 62                            | 16.3         | -                                      | -               |
| <i>Education</i>                              |                               |              |                                        |                 |
| No school certificate or other qualifications | 22                            | 5.8          | 0                                      | 0               |
| School or intermediate certificate            | 87                            | 22.9         | 6                                      | 46.2            |
| Year 12 or leaving certificate                | 54                            | 14.2         | 2                                      | 15.4            |
| Trade/ apprenticeship                         | 30                            | 7.9          | 1                                      | 7.7             |
| Certificate/ diploma                          | 76                            | 20.0         | 2                                      | 15.4            |
| University degree or higher                   | 95                            | 25.0         | 2                                      | 15.4            |
| Missing                                       | 16                            | 4.2          | -                                      | -               |

2

---

*Public/Private*

---

|         |     |      |   |      |
|---------|-----|------|---|------|
| Public  | 134 | 35.3 | 9 | 69.2 |
| Private | 246 | 64.7 | 4 | 30.8 |

---

13

14

For peer review only

15 Table 2. Exploratory Factor Analysis (EFA) and emerging variables.

| Factor   | Eigenvalue | Difference | Proportion | Cumulative |
|----------|------------|------------|------------|------------|
| Factor 1 | 2.53       | 0.85       | 0.18       | 0.18       |
| Factor 2 | 1.69       | 0.42       | 0.12       | 0.30       |
| Factor 3 | 1.27       | 0.12       | 0.09       | 0.39       |

Bartlett test of sphericity  $p=0.000$

Kaiser-Meyer-Olkin (KMO)= 0.62

16

17

| Variable                                                          | Factor 1    | Factor 2    | Factor 3    |
|-------------------------------------------------------------------|-------------|-------------|-------------|
| Did you feel your dietary requirements were met in hospital?      | <b>0.88</b> | 0.01        | 0.10        |
| Overall, how would you rate the quality of the food in hospital?  | <b>0.86</b> | 0.01        | 0.09        |
| How would you describe the general level of pain you experienced? | -0.02       | <b>0.83</b> | 0.10        |
| When you left hospital, how would you rate your pain out of 10?   | 0.04        | <b>0.75</b> | 0.09        |
| Did you feel well rested when you left the hospital?              | 0.20        | 0.18        | <b>0.75</b> |
| How would you rate the quality of sleep in the hospital? (Poor)   | 0.30        | 0.18        | <b>0.67</b> |

18

19

20 Table 3. Results of multiple logistic regression analysis examining the association between  
 21 patient, hospital and transition to general practice factors associated with unplanned 30-day  
 22 readmission to hospital.

| <i>Relevant Variables</i>      | <i>Full model*</i> |               |                | <i>Reduced model**</i> |               |                |
|--------------------------------|--------------------|---------------|----------------|------------------------|---------------|----------------|
|                                | <i>OR</i>          | <i>95% CI</i> | <i>p-Value</i> | <i>OR</i>              | <i>95% CI</i> | <i>p-Value</i> |
| <i>Public or Private</i>       | 3.788              | 0.47-30.293   | 0.211          | 6.879                  | 1.71-27.54    | 0.007          |
| <i>Co-morbidity</i>            |                    |               |                |                        |               |                |
| Stroke                         | 23.92              | 0.495-1165.54 | 0.1091         | -                      | -             | -              |
| Upper gastrointestinal disease | 0.12               | 0.00-3.374    | 0.210          | -                      | -             | -              |
| <i>Living status</i>           |                    |               |                |                        |               |                |
| I live with my children        | 2.8                | 0.5-59.7      | 0.5            | -                      | -             | -              |
| <i>Self-Rated Health</i>       |                    |               |                |                        |               |                |
| Fair                           | 0.90               | 0.02-40.981.0 | 0.961.0        | -                      | -             | -              |
| Good                           | 1.61               | 0.31-19.326   | 0.71           | -                      | -             | -              |
| <i>Information Package</i>     |                    |               |                |                        |               |                |
| Attended info session          | 0.82               | 0.091-7.071   | 0.859          | -                      | -             | -              |
| Waiting time to see GP         | 0.61               | 0.114-2.687   | 0.51           | -                      | -             | -              |
| Attendance to rehabilitation   | 1.92               | 0.51-7.23     | 0.33           | 0.172                  | 0.051-0.596   | 0.006          |

23 Note. \*Full model included public or private hospital; stroke or transient ischemic attack (TIA); upper  
 24 gastrointestinal disease; Self-rated health; given an information package or checklist before surgery; usual  
 25 waiting time to see GP; attendance to recommended rehabilitation or physiotherapy; and living status.

26 \*\*Reduced model included variables public or private hospital and attendance to recommended rehabilitation or  
 27 physiotherapy. Both the models were run when adjusting for age and sex.



**STROBE 2007 (v4) Statement—Checklist of items that should be included in reports of *cross-sectional studies***

| Section/Topic                | Item # | Recommendation                                                                                                                                                                       | Reported on page # |
|------------------------------|--------|--------------------------------------------------------------------------------------------------------------------------------------------------------------------------------------|--------------------|
| <b>Title and abstract</b>    | 1      | (a) Indicate the study's design with a commonly used term in the title or the abstract                                                                                               | 1-3                |
|                              |        | (b) Provide in the abstract an informative and balanced summary of what was done and what was found                                                                                  | 3                  |
| <b>Introduction</b>          |        |                                                                                                                                                                                      |                    |
| Background/rationale         | 2      | Explain the scientific background and rationale for the investigation being reported                                                                                                 | 5,6                |
| Objectives                   | 3      | State specific objectives, including any prespecified hypotheses                                                                                                                     | 6                  |
| <b>Methods</b>               |        |                                                                                                                                                                                      |                    |
| Study design                 | 4      | Present key elements of study design early in the paper                                                                                                                              | 7                  |
| Setting                      | 5      | Describe the setting, locations, and relevant dates, including periods of recruitment, exposure, follow-up, and data collection                                                      | 6,7,8              |
| Participants                 | 6      | (a) Give the eligibility criteria, and the sources and methods of selection of participants                                                                                          | 6                  |
| Variables                    | 7      | Clearly define all outcomes, exposures, predictors, potential confounders, and effect modifiers. Give diagnostic criteria, if applicable                                             | 7,8                |
| Data sources/<br>measurement | 8*     | For each variable of interest, give sources of data and details of methods of assessment (measurement). Describe comparability of assessment methods if there is more than one group | 7,8                |
| Bias                         | 9      | Describe any efforts to address potential sources of bias                                                                                                                            | 9                  |
| Study size                   | 10     | Explain how the study size was arrived at                                                                                                                                            | 7                  |
| Quantitative variables       | 11     | Explain how quantitative variables were handled in the analyses. If applicable, describe which groupings were chosen and why                                                         | 8,9,10             |
| Statistical methods          | 12     | (a) Describe all statistical methods, including those used to control for confounding                                                                                                | 8,9,10             |
|                              |        | (b) Describe any methods used to examine subgroups and interactions                                                                                                                  | 8,9,10             |
|                              |        | (c) Explain how missing data were addressed                                                                                                                                          | 10                 |
|                              |        | (d) If applicable, describe analytical methods taking account of sampling strategy                                                                                                   | 10                 |
|                              |        | (e) Describe any sensitivity analyses                                                                                                                                                | 10                 |
| <b>Results</b>               |        |                                                                                                                                                                                      |                    |

|                          |     |                                                                                                                                                                                                              |               |
|--------------------------|-----|--------------------------------------------------------------------------------------------------------------------------------------------------------------------------------------------------------------|---------------|
| Participants             | 13* | (a) Report numbers of individuals at each stage of study—eg numbers potentially eligible, examined for eligibility, confirmed eligible, included in the study, completing follow-up, and analysed            | 11            |
|                          |     | (b) Give reasons for non-participation at each stage                                                                                                                                                         | Not available |
|                          |     | (c) Consider use of a flow diagram                                                                                                                                                                           |               |
| Descriptive data         | 14* | (a) Give characteristics of study participants (eg demographic, clinical, social) and information on exposures and potential confounders                                                                     | Table 1       |
|                          |     | (b) Indicate number of participants with missing data for each variable of interest                                                                                                                          | Table 1       |
| Outcome data             | 15* | Report numbers of outcome events or summary measures                                                                                                                                                         | Tables 1-3    |
| Main results             | 16  | (a) Give unadjusted estimates and, if applicable, confounder-adjusted estimates and their precision (eg, 95% confidence interval). Make clear which confounders were adjusted for and why they were included | 11,12         |
|                          |     | (b) Report category boundaries when continuous variables were categorized                                                                                                                                    | 11,12         |
|                          |     | (c) If relevant, consider translating estimates of relative risk into absolute risk for a meaningful time period                                                                                             |               |
| Other analyses           | 17  | Report other analyses done—eg analyses of subgroups and interactions, and sensitivity analyses                                                                                                               | 11,12         |
| <b>Discussion</b>        |     |                                                                                                                                                                                                              |               |
| Key results              | 18  | Summarise key results with reference to study objectives                                                                                                                                                     | 13,14,15      |
| Limitations              | 19  | Discuss limitations of the study, taking into account sources of potential bias or imprecision. Discuss both direction and magnitude of any potential bias                                                   | 15,16         |
| Interpretation           | 20  | Give a cautious overall interpretation of results considering objectives, limitations, multiplicity of analyses, results from similar studies, and other relevant evidence                                   | 16            |
| Generalisability         | 21  | Discuss the generalisability (external validity) of the study results                                                                                                                                        | 15,16         |
| <b>Other information</b> |     |                                                                                                                                                                                                              |               |
| Funding                  | 22  | Give the source of funding and the role of the funders for the present study and, if applicable, for the original study on which the present article is based                                                | 17            |

\*Give information separately for cases and controls in case-control studies and, if applicable, for exposed and unexposed groups in cohort and cross-sectional studies.

**Note:** An Explanation and Elaboration article discusses each checklist item and gives methodological background and published examples of transparent reporting. The STROBE checklist is best used in conjunction with this article (freely available on the Web sites of PLoS Medicine at <http://www.plosmedicine.org/>, Annals of Internal Medicine at <http://www.annals.org/>, and Epidemiology at <http://www.epidem.com/>). Information on the STROBE Initiative is available at [www.strobe-statement.org](http://www.strobe-statement.org).

# BMJ Open

## Understanding Factors affecting 30-day Unplanned Readmissions for Patients undergoing Total Knee Arthroplasty (TKA): The ACT Transition from Hospital to Home Orthopaedics Survey

|                                 |                                                                                                                                                                                                                                                                                                                                                                                                                                                                                                                                                                                                                                                                                                                                                                           |
|---------------------------------|---------------------------------------------------------------------------------------------------------------------------------------------------------------------------------------------------------------------------------------------------------------------------------------------------------------------------------------------------------------------------------------------------------------------------------------------------------------------------------------------------------------------------------------------------------------------------------------------------------------------------------------------------------------------------------------------------------------------------------------------------------------------------|
| Journal:                        | <i>BMJ Open</i>                                                                                                                                                                                                                                                                                                                                                                                                                                                                                                                                                                                                                                                                                                                                                           |
| Manuscript ID                   | bmjopen-2021-053831.R1                                                                                                                                                                                                                                                                                                                                                                                                                                                                                                                                                                                                                                                                                                                                                    |
| Article Type:                   | Original research                                                                                                                                                                                                                                                                                                                                                                                                                                                                                                                                                                                                                                                                                                                                                         |
| Date Submitted by the Author:   | 31-Jan-2022                                                                                                                                                                                                                                                                                                                                                                                                                                                                                                                                                                                                                                                                                                                                                               |
| Complete List of Authors:       | Chhabra, Madhur; Australian National University, Department of Health Services and Research<br>Perriman, Diana; ACT Health, Trauma & Orthopaedic Research Unit; Australian National University Medical School<br>Phillips, Christine; Australian National University Medical School<br>Parkinson, Anne; Australian National University, Health Services Research and Policy<br>Glasgow, Nicholas; Australian National University Medical School<br>Douglas, Kirsty; Australian National University Medical School<br>Cox, Darlene; Health Care Consumers Association, ACT<br>Smith, Paul; ACT Health, Trauma and Orthopaedic Unit; Australian National University Medical School<br>Desborough, Jane; Australian National University, Health Services Research and Policy |
| <b>Primary Subject Heading</b>: | Health services research                                                                                                                                                                                                                                                                                                                                                                                                                                                                                                                                                                                                                                                                                                                                                  |
| Secondary Subject Heading:      | Surgery                                                                                                                                                                                                                                                                                                                                                                                                                                                                                                                                                                                                                                                                                                                                                                   |
| Keywords:                       | Knee < ORTHOPAEDIC & TRAUMA SURGERY, Health policy < HEALTH SERVICES ADMINISTRATION & MANAGEMENT, Quality in health care < HEALTH SERVICES ADMINISTRATION & MANAGEMENT                                                                                                                                                                                                                                                                                                                                                                                                                                                                                                                                                                                                    |
|                                 |                                                                                                                                                                                                                                                                                                                                                                                                                                                                                                                                                                                                                                                                                                                                                                           |

SCHOLARONE™  
Manuscripts



I, the Submitting Author has the right to grant and does grant on behalf of all authors of the Work (as defined in the below author licence), an exclusive licence and/or a non-exclusive licence for contributions from authors who are: i) UK Crown employees; ii) where BMJ has agreed a CC-BY licence shall apply, and/or iii) in accordance with the terms applicable for US Federal Government officers or employees acting as part of their official duties; on a worldwide, perpetual, irrevocable, royalty-free basis to BMJ Publishing Group Ltd ("BMJ") its licensees and where the relevant Journal is co-owned by BMJ to the co-owners of the Journal, to publish the Work in this journal and any other BMJ products and to exploit all rights, as set out in our [licence](#).

The Submitting Author accepts and understands that any supply made under these terms is made by BMJ to the Submitting Author unless you are acting as an employee on behalf of your employer or a postgraduate student of an affiliated institution which is paying any applicable article publishing charge ("APC") for Open Access articles. Where the Submitting Author wishes to make the Work available on an Open Access basis (and intends to pay the relevant APC), the terms of reuse of such Open Access shall be governed by a Creative Commons licence – details of these licences and which [Creative Commons](#) licence will apply to this Work are set out in our licence referred to above.

Other than as permitted in any relevant BMJ Author's Self Archiving Policies, I confirm this Work has not been accepted for publication elsewhere, is not being considered for publication elsewhere and does not duplicate material already published. I confirm all authors consent to publication of this Work and authorise the granting of this licence.

1  
2  
3 1 **Understanding Factors affecting 30-day Unplanned Readmissions for Patients**  
4  
5 2 **undergoing Total Knee Arthroplasty (TKA): The ACT Transition from Hospital to**  
6  
7 3 **Home Orthopaedics Survey**  
8  
9

10 4 **Running title:** Unplanned readmissions following knee arthroplasty  
11  
12

13 5 **Authors:**  
14

15  
16 6 Madhur Chhabra<sup>a</sup>, Diana Perriman<sup>b,c</sup>, Christine Phillips<sup>c</sup>, Anne Parkinson<sup>a</sup>, Nicholas  
17  
18 7 Glasgow<sup>c</sup>, Kirsty Douglas<sup>c</sup>, Darlene Cox<sup>d</sup>, Paul Smith<sup>b,c</sup>, Jane Desborough<sup>a</sup>.  
19  
20

21  
22 8 **Listed author contributions:**  
23

24  
25 9 Madhur Chhabra<sup>a</sup>: data collection, analysis, drafting and finalising of manuscript;  
26

27  
28 10 Diana Perriman<sup>b,c</sup>: data collection and analysis, significant contributions to final manuscript,  
29

30 11 Christine Phillips<sup>c</sup>: survey development, significant contributions to final manuscript  
31

32  
33 12 Anne Parkinson<sup>a</sup>: data collection, significant contributions to final manuscript,  
34

35  
36 13 Nicholas Glasgow<sup>c</sup>: survey development, significant contributions to final manuscript;  
37

38  
39 14 Kirsty Douglas<sup>c</sup>: survey development, significant contributions to final manuscript;  
40

41  
42 15 Darlene Cox<sup>d</sup>: survey development, contributions to final manuscript;  
43

44  
45 16 Paul Smith<sup>b,c</sup>: survey development, significant contributions to final manuscript,  
46

47  
48 17 Jane Desborough<sup>a</sup>: study conception and survey design, data collection, supervised data  
49  
50 18 analysis, significant contributions to final manuscript.  
51

52  
53 19 **Listed author affiliations:**  
54  
55  
56  
57  
58  
59  
60

- 1  
2  
3 20 a. Department of Health Services, Research and Policy, Research School of Population  
4  
5 21 Health, College of Health and Medicine, Australian National University, Canberra, ACT,  
6  
7 22 Australia  
8  
9  
10 23 b. Trauma and Orthopaedic Research Unit, ACT Health  
11  
12  
13 24 c. Australian National University Medical School, College of Health and Medicine,  
14  
15 25 Australian National University, Canberra, Australian Capital Territory (ACT), Australia  
16  
17  
18 26 d. Health Care Consumers Association, ACT  
19  
20  
21 27 **Corresponding author:** Madhur Chhabra, madhur.chhabra@anu.edu.au , 0449894092  
22  
23  
24 28 Department of Health Services, Research and Policy, Research School of Population Health,  
25  
26 29 63 Eggleston Road, College of Health and Medicine, Australian National University,  
27  
28 30 Canberra, ACT (2601), Australia  
29  
30  
31 31 **All authors have read and approve the manuscript below**  
32  
33  
34  
35  
36  
37  
38  
39  
40  
41  
42  
43  
44  
45  
46  
47  
48  
49  
50  
51  
52  
53  
54  
55  
56  
57  
58  
59  
60

## 32 Abstract

### 33 Objectives

34 The aim of this study was to investigate factors associated with unplanned 30-day  
35 readmissions following a TKA, including association with post-hospital syndrome, patient  
36 enablement, and transition from hospital to home.

### 37 Design, setting and participants

38 A cross-sectional written survey of public and private patients attending a six-week follow-up  
39 appointment after TKA at one of four clinical services in the Australian Capital Territory  
40 (ACT) between 1 February 2018 and 31 January 2019. Multiple logistic regression analyses  
41 were used to measure associations between patient, hospital and transitional care factors with  
42 unplanned 30-day readmissions, whilst controlling for known confounders.

### 43 Results

44 Of the 380 participants who completed the survey (n=380, 54% of TKAs undertaken over the  
45 study period), 4% (n=13) were subsequently readmitted within 30 days of discharge after a  
46 primary hospitalization. After controlling for age and sex, public patients were significantly  
47 more likely to be readmitted within 30 days than private patients (OR=6.31, 95% CI:1.59-  
48 25.14, p=0.009), and patients who attended rehabilitation were significantly less likely to  
49 have been readmitted within 30 days than those who did not (OR=0.16, 95% CI: 0.04-0.57,  
50 p=0.005). There were no associations between post-hospital syndrome or patient enablement  
51 and 30-day readmissions in this study.

### 52 Conclusion

1  
2  
3 53 Reasons underlying the difference in unplanned readmission rates for public versus private  
4  
5 54 patients need to be explored, including differences in surgical waiting times. Strategies to  
6  
7 55 foster increased participation post-surgical rehabilitation programs need to be developed as  
8  
9  
10 56 an avenue to mitigate the burden of unplanned 30-day readmissions on individuals and health  
11  
12 57 systems.

13  
14  
15 58 **Keywords:** knee arthroplasty, 30-day readmission, post-hospital syndrome, transitional care,  
16  
17 59 hospital performance.

20  
21 60 **ARTICLE SUMMARY**

- 22  
23  
24 61 • A survey, co-designed with clinicians and patients, examined associations between  
25  
26 62 patient, hospital and transitional care factors and unplanned 30-day readmission  
27  
28 63 following total knee arthroplasty in both public and private hospital settings.  
29  
30  
31 64 • This study is the first to use patient-reported responses to quantify the effect of  
32  
33 65 hospital experience of pain, sleep, and nutrition in unplanned 30-day readmissions  
34  
35 66 following total knee arthroplasty.  
36  
37  
38 67 • A limitation of this study is that results were based on self-reported patient outcomes  
39  
40 68 with no capacity to link them to hospital records for confirmation as well as the lack  
41  
42 69 of information from those who declined the survey.  
43  
44

45 70  
46  
47  
48  
49  
50  
51  
52  
53  
54  
55  
56  
57  
58  
59  
60



## 71 **Introduction**

72 Unplanned readmission rates are an indicator of health system performance [1, 2]. The rate of  
73 unplanned 30-day readmission for total knee arthroplasty (TKA) in Australian public  
74 hospitals was 2.6% in 2017-18 [3]. In the United States, readmission rates have been used as  
75 an incentive to reduce readmission and drive improved practice [4]. While there is no such  
76 program in Australia, the economic burden of unplanned readmissions makes it a policy  
77 priority [3, 5, 6].

78 The rate of knee replacement surgery has more than doubled over the past 15 years both in  
79 Australia and internationally [7] with the highest rate of increase seen in the private sector [3,  
80 5, 8]. This growing demand has placed increased logistical and financial strain on the  
81 healthcare system, including associated unplanned 30-day readmissions [5]. The most  
82 common condition-related causes of unplanned readmission following a total knee  
83 arthroplasty (TKA) are surgical-site infection, arthrofibrosis, cellulitis, concomitant co-  
84 morbidities, and fluid and electrolyte imbalance [9]. Other factors such as old age, revision  
85 procedure and acute length of hospital stay also increase the risk of unplanned 30-day  
86 readmissions [9]. Beyond the complications as a cause of the readmission, there are patient  
87 factors related to the hospital stay that increase risk of readmission [10].

88 Krumholz [11] describes post-hospital syndrome as a period of vulnerability after discharge  
89 from the hospital which leaves a patient at increased risk of re-hospitalization from  
90 conditions which are often unrelated to the original reason for of admission. It is proposed  
91 that this acquired transient state might be due to patients' experiences of pain, sleep  
92 deprivation, and poor nutrition during their hospital stay [11]. While this hypothesis is  
93 supported by evidence that increasing patient capacity for self-care is effective at reducing  
94 30-day readmissions [10], , as far as we are aware, post-hospital syndrome has not been

1  
2  
3 95 quantified or measured as an independent variable in association with unplanned 30-day  
4  
5 96 readmission.

6  
7  
8 97 Research examining unplanned 30-day readmissions has described a number of associated  
9  
10 98 factors. These factors include: clinical and demographic characteristics [12, 13]; a lack of  
11  
12 99 access to primary care; the continuity and regularity of primary care [14-16]; and deficits in  
13  
14 100 hospital discharge planning, which often focus on knowledge provision rather than patients'  
15  
16 101 capacity to implement this knowledge [10].

17  
18  
19  
20 102 The patient-enablement instrument is a tool used to measure a person's knowledge and  
21  
22 103 understanding of their health condition; confidence to manage their condition, health, and life  
23  
24 104 [17]; and their ability to source appropriate healthcare for their individual needs. While this  
25  
26 105 measure has largely been examined in primary-care settings, its role in preventing unplanned  
27  
28 106 hospital readmissions has not yet been explored.

29  
30  
31  
32 107 The purpose of this study was to investigate factors associated with unplanned 30-day  
33  
34 108 readmissions following a TKA, including aspects of hospital experiences, patient enablement,  
35  
36 109 and transition from hospital to home.

## 40 110 **Methods**

41  
42 111

### 43 112 **Study population**

44  
45  
46 113 Consecutive patients over the age of 16 years, attending a six-week follow-up appointment  
47  
48 114 after undergoing total knee arthroplasty at one of four private and public clinical services  
49  
50 115 between 1 February 2018 and 31 January 2019.

### 51 116 **Study design**

52  
53 117

1  
2  
3 118 A cross-sectional survey was conducted in the Australian Capital Territory (ACT) between 1  
4  
5 119 February 2018 and 31 January 2019 at all private and public sites undertaking lower limb  
6  
7 120 joint replacement services. Data was collected retrospectively at the six-week follow-up  
8  
9 121 appointment post-surgery for both total knee and hip replacement (THA). The responses for  
10  
11 122 patients having undergone elective TKA are presented in this paper.  
12  
13  
14

### 15 123 **Instrument**

16 124  
17  
18  
19  
20 125 The *ACT Transition from Hospital to Home Survey* was developed and piloted by researchers  
21  
22 126 at the Australian National University, Canberra Hospital, Academic Unit of General Practice  
23  
24 127 ACT Health, Capital Health Network, Health Care Consumer Association ACT, and people  
25  
26 128 who had previously experienced either TKA or THA [18]. The 50-item survey was designed  
27  
28 129 to measure patients' experiences in hospital and transition to home across six domains: 1.  
29  
30 130 Patient demographic characteristics and co-morbidities; 2. Post-hospital syndrome; 3.  
31  
32 131 Medication enablement; 4. Patient enablement; 5. Transition to general practice; and 6. Pre-  
33  
34 132 and post-hospital information and pre-/post-surgical rehabilitation  
35  
36  
37 133 Co-morbidities: Morbidity was assessed with the validated 18-item Functional Comorbidity  
38  
39 134 Index which is used to predict functional status rather than mortality [19].  
40  
41  
42 135 Post-hospital syndrome: Fifteen items within three domains covering patients' experiences of  
43  
44 136 sleep, pain, and diet in hospital were designed to measure post-hospital syndrome.  
45  
46  
47 137 Medication enablement: Three items measured medication enablement in terms of patients'  
48  
49 138 knowledge and ability to manage their medications following discussions with health care  
50  
51 139 providers derived from a previous study in general practice nurse consultations [20]. The  
52  
53 140 internal consistency of this scale was established ( $\alpha = 0.80$ ) in the pilot study (unpublished  
54  
55 141 results).  
56  
57  
58  
59  
60

1  
2  
3 142 Patient enablement: This is the internationally validated six-item Patient Enablement

4  
5 143 Instrument [21] used primarily in primary-care research.

6  
7  
8 144 Transition to general practice: 10-items assessing patients' relationships with their general

9  
10 145 practitioner (GP) in terms of continuity of care, regularity of care, healthcare planning,

11  
12 146 patients' understanding of when to see their GP following discharge, and access to care.

13  
14 147 These questions were refined as a result of the pilot study to eliminate covariance and

15  
16 148 repetition.

17  
18  
19  
20 149 Interaction with the recommended rehabilitation program: Referral and attendance to

21  
22 150 outpatient physiotherapy rehabilitation post-discharge was examined with one item.

23  
24  
25  
26 151 **Data collection**

27  
28  
29 152 The paper surveys were distributed by reception staff at patients' six-week post-operative

30  
31 153 consultation. Staff were given a protocol and suggested wording to use when providing the

32  
33 154 survey. An information sheet about the study was provided to patients and anonymity

34  
35 155 guaranteed. Patients were not required to include their name or identifying information on the

36  
37 156 survey. This ensured that patients understood that participation or non-participation did not

38  
39 157 affect the care they received and that completed surveys were confidential to clinic staff.

40  
41  
42 158 Completion of the survey implied written consent, and this was agreed and approved by the

43  
44 159 local ethics committee. Surveys were deposited in a sealed box in the waiting room and

45  
46 160 collected by the researcher at regular intervals.

47  
48  
49  
50 161

51  
52  
53 162 **Data analysis**

54  
55 163

1  
2  
3 164 Completed survey data was collated and descriptive and inferential statistics used. Variables  
4  
5 165 were described using summary statistics and frequencies. Some variables were grouped to  
6  
7 166 create new variables and others, for example, BMI, were converted to categorical variables  
8  
9  
10 167 for analysis. The primary outcome of interest was self-reported 30-day readmission to  
11  
12 168 hospital following discharge, categorized as a binary variable (yes/no). Age, sex, living  
13  
14 169 situation, country of origin, education, self-rated health, comorbidities, post-hospital  
15  
16 170 syndrome (experiences of sleep, diet and pain), experiences of family practice (access,  
17  
18 171 continuity, planning, regularity), medication enablement, and patient enablement were  
19  
20 172 separate independent variables.  
21  
22

23  
24 173 An exploratory factor analysis (EFA) with orthogonal varimax rotation was undertaken to  
25  
26 174 explore the relationship between variables which described post hospital syndrome. The  
27  
28 175 modes/themes which had an eigenvalue of  $>1$  were retained and the internal consistency of  
29  
30 176 the modes which emerged was examined using Cronbach's alpha. The suitability of the data  
31  
32 177 for an EFA was confirmed with a Kaiser-Meyer-Olkin (KMO) criteria and Bartlett test.  
33  
34  
35 178 Prior to analysis, variable independence was established. Ordinal variables were examined  
36  
37 179 using Spearman's correlation coefficient and categorical variables using the chi squared ( $\chi^2$ )  
38  
39 180 test and odds ratio. If a strong correlation ( $> 0.6$ ) or a significant association ( $p \leq 0.2$ ) existed  
40  
41 181 between two eligible variables, only one of these was retained for inclusion in the final  
42  
43 182 analysis.  
44  
45

46  
47  
48 183 Univariate logistic regression analysis was conducted for each independent variable and the  
49  
50 184 dependent variable (unplanned 30-day readmission). Univariate logistic regression was  
51  
52 185 conducted on each individual comorbidity item, and then for the total comorbidity score.  
53  
54  
55 186 To further eliminate potential confounding, two multiple logistic regression models were run  
56  
57 187 - one including eligible individual variables from within the Functional Comorbidity Index,  
58  
59  
60

1  
2  
3 188 Medication Enablement questions and the Patient Enablement Instrument; and a second  
4  
5 189 including total scores.  
6  
7  
8 190 The full multiple regression model included eight variables. These were public or private  
9  
10 191 hospital; upper gastrointestinal disease; self-rated health; given an information package or  
11  
12 192 checklist before surgery; usual waiting time to see GP; attendance at recommended  
13  
14 193 rehabilitation or physiotherapy; and living status. The reduced model included 'public or  
15  
16 194 private hospital' and 'attendance at recommended rehabilitation or physiotherapy'. Only risk  
17  
18 195 factors with  $p$ -values  $\leq 0.25$  were included in the multiple logistic regression analyses.  
19  
20 196 Logistic regression with backward stepwise selection was used to choose risk factors for the  
21  
22 197 multivariable model. A significance level of 0.25 was required to allow a risk factor into the  
23  
24 198 model, and a significance level of 0.25 was required for a risk factor to stay in the model.  
25  
26 199 Additionally, risk factor selection for the model may be driven by available knowledge and  
27  
28 200 biological plausibility of potential confounders, taking into consideration the hypothesis of  
29  
30 201 interest. The adjusted odds ratio and its 95% confidence interval were calculated for each risk  
31  
32 202 factor in the presence of others in the final model. Both the models were adjusted for age and  
33  
34 203 sex.  
35  
36 204 Likelihood ratio tests and Hosmer Lemeshow goodness of fit test were used to check the fit  
37  
38 205 of the final model. The Receiver Operator Characteristic Curve (ROC) was plotted to check  
39  
40 206 the specificity and sensitivity of the predicted model.  
41  
42 207 Stata/IC 15.1 (StataCorp LLC, Texas, USA) was used to perform all statistical analyses [22].  
43  
44  
45  
46  
47  
48  
49  
50

## 51 208 **Missing data**

52 209 The criteria used for acceptability of non-response to all survey questions was 10% or lower  
53  
54 210 including for medication and patient enablement scale [23-25]. Missing data for individual  
55  
56  
57  
58  
59  
60

1  
2  
3 211 variables within the medication and patient enablement scales were imputed to equal the  
4  
5 212 median value of non-missing data [26-29].  
6  
7

### 8 213 **Ethical approval**

9  
10 214

11  
12  
13 215 Ethical approval was obtained from the ACT Health (ETHLR.17.207), Calvary Healthcare  
14 216 Bruce (45-2017) and the Australian National University (2017/798) Human Research Ethics  
15  
16  
17  
18 217 Committees. All participants provided written informed consent to participate in this study.  
19  
20

### 21 218 **Results**

22  
23 219 Of the 1069 people invited to participate, 827 (77%) completed the overall survey.  
24  
25

26 220 Of all surgeries, 380 received a total knee arthroplasty and of these 13 were readmitted within  
27  
28 221 30 days. Participant demographics are presented in Table 1. Private patients accounted for  
29  
30 222 65% of the total population (247 private patients, 133 public patients). This represented 44%  
31  
32 223 of all private patients and 96% of all public patients who had a TKA during the study period  
33  
34 224 which represents 54% of all TKAs. 57% of those who underwent knee surgery were females.  
35  
36

37 225 The mean age was 67.4 with a standard deviation 0.5 years (age range 44.8 to 91.0 years).  
38  
39

40 226 Mean BMI was 31.5 kg/m<sup>2</sup> with most having a BMI of >30 (58%). Most participants were  
41  
42

43 227 non-indigenous (99%). There were three people of Aboriginal and/or Torres Strait Islander  
44  
45

46 228 origin, none of whom was readmitted. There were proportionally more private patients aged  
47  
48

49 229 65-84 years (63%) compared to public (53%), whereas proportionally more public patients  
50  
51

52 230 were in the 45-64 age group (44% compared to 35%). The proportion of females within the  
53  
54

55 231 public cohort was greater than private (67% compared to 57%). A higher proportion of  
56  
57

58 232 public patients lived alone (31% compared to 23%).  
59  
60

233

234 Table 1. Characteristics of all TKA patients and those with an unplanned 30-day  
 235 readmission.

236

| Variable                   | Public | Private | Total         |
|----------------------------|--------|---------|---------------|
|                            | N=133  | N=247   | N=13/380 (%)* |
|                            | n/N    | n/N     |               |
| <b>Age</b>                 |        |         |               |
| 45-64                      | 1/55   | 1/79    | 2/134 (1.5%)  |
| 65- 84                     | 8/66   | 2/145   | 10/211(4.7%)  |
| >85 years                  | 0/4    | 0/5     | 0/9           |
| <b>Gender</b>              |        |         |               |
| Male                       | 2/42   | 1/97    | 3/139 (2.2%)  |
| Female                     | 7/86   | 3/129   | 10/215 (4.6%) |
| Other                      | 0/0    | 0/2     | 0/2           |
| <b>Language</b>            |        |         |               |
| Other than English at home | 0/21   | 2/28    | 2/49 (4.1%)   |
| Only speak English         | 9/108  | 2/212   | 11/320 (3.4%) |
| <b>Living Status</b>       |        |         |               |
| Live alone                 | 7/40   | 0/55    | 2/95 (2.1%)   |
| Live with someone          | 2/90   | 4/189   | 11/273 (4%)   |
| <b>BMI Calculations</b>    |        |         |               |
| BMI (Mean)                 | 31.5   |         |               |
| 18.5-24.4                  | 1/7    | 0/22    | 1/31 (3.2%)   |
| 24.5-30                    | 1/34   | 2/86    | 2/129 (1.6%)  |
| >30                        | 7/74   | 3/109   | 10/220 (4.5%) |
| <b>Indigenous status</b>   |        |         |               |
| Aboriginal                 | 0/1    | 0/0     | 0/1           |
| Torres Strait Islander     | 0/1    | 0/1     | 0/2           |



|                       |                                                     |       |       |               |
|-----------------------|-----------------------------------------------------|-------|-------|---------------|
|                       | Both                                                |       |       | 0/0           |
|                       | Neither                                             | 9/104 | 4/198 | 13/315 (4.1%) |
| <b>Education</b>      | No school certificate<br>or other<br>qualifications | 0/9   | 0/11  | 0/22          |
|                       | School or<br>intermediate<br>certificate            | 5/40  | 1/40  | 6/87 (6.9%)   |
|                       | Year 12 or leaving<br>certificate                   | 1/17  | 1/32  | 2/54 (3.7%)   |
|                       | Trade/<br>apprenticeship                            | 0/10  | 1/17  | 1/30 (3.3%)   |
|                       | Certificate/ diploma                                | 2/23  | 0/50  | 2/76 (2.6%)   |
|                       | University degree or<br>higher                      | 1/17  | 1/68  | 2/95 (2.1%)   |
| <b>Public/Private</b> | Public                                              | -     | -     | 9/134 (6.7%)  |
|                       | Private                                             | -     | -     | 4/246 (1.6%)  |

\*Missing values for age: 26, Gender: 24, Language: 11, Living status: 6, BMI: 36, Indigenous status: 62 , Education: 16.

\*\*Missing value for readmission for age: 1

### 241 Post-hospital syndrome exploratory factor analysis (EFA)

242 The results of the exploratory factor analysis are reported in Table 2. Three modes/themes  
243 with acceptable internal consistency emerged. First, diet, which was described by responses  
244 to two questions: “Did you feel your dietary requirements were met in hospital?” and  
245 “Overall, how would you rate the quality of the food in hospital?” The second theme was  
246 pain, which was also explained by two questions: “How would you describe the general level  
247 of pain you experienced?” and “When you left hospital, how would you rate your pain out of  
248 10?” The third was sleep which was explained by “Did you feel well rested when you left the  
249 hospital?” and “How would you rate the quality of sleep in the hospital?”

250 Floor and ceiling effects were observed for patient enablement due to a large number of  
 251 participants reporting being either fully enabled or not enabled at all. To address this, the  
 252 variable was dichotomised around the mean where 'less enabled' was  $\leq 6.5$  and 'more  
 253 enabled' was  $>6.5$  in line with previous studies using this instrument [28, 30]. Sixty percent  
 254 of participants (n=212/357) reported that they were less enabled to manage their health after  
 255 their stay in the hospital.

256 Table 2. Exploratory Factor Analysis (EFA) and emerging variables.

| Factor                                                            | Eigenvalue  | Difference  | Proportion  | Cumulative |
|-------------------------------------------------------------------|-------------|-------------|-------------|------------|
| Factor 1                                                          | 2.53        | 0.85        | 0.18        | 0.18       |
| Factor 2                                                          | 1.69        | 0.42        | 0.12        | 0.30       |
| Factor 3                                                          | 1.27        | 0.12        | 0.09        | 0.39       |
| Bartlett test of sphericity $p=0.000$                             |             |             |             |            |
| Kaiser-Meyer-Olkin (KMO)= 0.62                                    |             |             |             |            |
| Variable                                                          | Factor 1    | Factor 2    | Factor 3    |            |
| Did you feel your dietary requirements were met in hospital?      | <b>0.88</b> | 0.01        | 0.10        |            |
| Overall, how would you rate the quality of the food in hospital?  | <b>0.86</b> | 0.01        | 0.09        |            |
| How would you describe the general level of pain you experienced? | -0.02       | <b>0.83</b> | 0.10        |            |
| When you left hospital, how would you rate your pain out of 10?   | 0.04        | <b>0.75</b> | 0.09        |            |
| Did you feel well rested when you left the hospital?              | 0.20        | 0.18        | <b>0.75</b> |            |
| How would you rate the quality of sleep in the hospital? (Poor)   | 0.30        | 0.18        | <b>0.67</b> |            |

259

## 260 Multiple logistic regression analysis

261 The results of univariate analysis are presented in Supplementary table 1. The Area Under the  
 262 Curve (AUC) was 0.79 indicating high overall accuracy of the logistic model (79%) (Figure  
 263 1). Eight variables were eligible for inclusion in the multiple logistic regression analysis. Due  
 264 to the wide confidence interval for stroke, this variable was eliminated from the full model.  
 265 Of these, 'public /private status' and 'rehabilitation attendance' were retained for the reduced  
 266 model as they were the only variables to retain significance after stepwise removal of the  
 267 other variables in the full model. The results of the multiple regression analysis are reported  
 268 in Table 3.

269 The final multiple regression model included a sample size of 328 observations and the  
 270 following factors remained significant. After controlling for age and sex, public patients were  
 271 significantly more likely to be readmitted within 30 days compared to private patients  
 272 (OR=6.31, 95% CI:1.59-25.14, p=0.009), and patients attended rehabilitation were  
 273 significantly less likely to be readmitted within 30 days of discharge than those who did not  
 274 (OR=0.16, 95% CI: 0.04-0.57, p=0.005).

275

276 Table 3. Results of multiple logistic regression analysis examining the association between  
 277 patient, hospital and transition to general practice factors associated with unplanned 30-day  
 278 readmission to hospital.

| <i>Relevant Variables</i> | <i>Full model*</i> |               |                | <i>Reduced model** (n=328)</i> |               |                |
|---------------------------|--------------------|---------------|----------------|--------------------------------|---------------|----------------|
|                           | <i>OR</i>          | <i>95% CI</i> | <i>p-Value</i> | <i>OR</i>                      | <i>95% CI</i> | <i>p-Value</i> |
| <i>Public or Private</i>  | 3.44               | 0.70-16.89    | 0.12           | 6.31                           | 1.59-25.14    | 0.009          |
| <i>Co-morbidity</i>       |                    |               |                |                                |               |                |

15

|                                     |      |            |      |      |           |       |
|-------------------------------------|------|------------|------|------|-----------|-------|
| Upper gastrointestinal disease      | 0.43 | 0.06-2.96  | 0.39 | -    | -         | -     |
| <i>Living status</i>                | 0.27 | 0.03-2.45  | 0.25 | -    | -         | -     |
| <i>Self-Rated Health</i>            | 0.39 | 0.14-1.13  | 0.08 | -    | -         | -     |
| <i>Information Package</i>          | 0.56 | 0.05-4.04  | 0.65 | -    | -         | -     |
| <i>Attended info session</i>        | 0.80 | 0.16-7.071 | 0.79 | -    | -         | -     |
| <i>Waiting time to see GP</i>       | 0.60 | 0.23-1.58  | 0.30 | -    | -         | -     |
| <i>Attendance to rehabilitation</i> | 0.21 | 0.05-0.96  | 0.04 | 0.16 | 0.04-0.57 | 0.005 |

*Note.* \*Full model included public or private hospital; upper gastrointestinal disease; Self-rated health; given an information package or checklist before surgery; usual waiting time to see GP; attendance to recommended rehabilitation or physiotherapy; and living status. \*\*Reduced model included variables public or private hospital and attendance to recommended rehabilitation or physiotherapy. Both the models were run when adjusting for age and sex.

## Discussion

The aim of this study was to investigate factors associated with unplanned 30-day readmission in TKA patients. Of the 4% of patients who had an unplanned readmission, those who attended public hospitals and those who did not attend an outpatient rehabilitation program were more likely to be readmitted to hospital within 30 days of discharge.

While the United States also has a similar 4% readmission rate following TKA [9, 31-33], this is higher than that reported by the Australian Institute of Health and Welfare (AIHW) [3]. However, our results may reflect the true readmission rate more accurately as the AIHW only reports public hospital data and the majority of TKAs in Australia are performed in the private sector.

In our study, public patients were more likely to be readmitted within 30 days as compared to private patients. The majority of respondents (65%) had their TKA in the private sector,

1  
2  
3 297 consistent with the higher proportion (80%) of TKA procedures performed in the private  
4  
5 298 sector in the ACT [34]. Our study has almost complete ascertainment from the public sector,  
6  
7 299 and reasonable ascertainment from the private sector, supporting the robustness of our  
8  
9  
10 300 findings. The increased likelihood of readmission for public patients might be explained by  
11  
12 301 several contributing factors such as socioeconomic status, longer waiting times and increased  
13  
14 302 disease complexity [35-40]. The median waiting time for a TKA in 2018-19 in the ACT  
15  
16 303 public hospital system was 62 days with 8.2% of patients waiting more than 365 days [35].  
17  
18 304 On the other hand, the median waiting time for Australian private patients was just 67 days  
19  
20 305 during the same period [2, 41]. Therefore, waiting time may be an important mediating factor  
21  
22 306 however association between the two may only be inferred and no causation can be implied.  
23  
24  
25  
26  
27 307 Patients who have had to wait longer constitute 1.2% of all unplanned 30-day readmissions  
28  
29 308 for elective surgical procedures in Australia [42]. TKA patients who waited longer than six  
30  
31 309 months have been described as having significantly worse function and quality of life scores,  
32  
33 310 as well as dissatisfaction rates which were mainly influenced by pre-operative anxiety and  
34  
35 311 depression [43]. It is important to understand that surgical waiting times are only part of the  
36  
37 312 waiting journey for patients in the public system. The mean waiting times recorded for  
38  
39 313 Australian patients do not take into account the lengthy process of referral, specialist  
40  
41 314 assessment and investigation [44]. Addressing long waiting lists by utilising non-surgical  
42  
43 315 exercise and education programs are increasingly being implemented and the evidence for  
44  
45 316 efficacy is strong [45, 46].  
46  
47  
48  
49  
50  
51 317 In our study, patients who attended rehabilitation were less likely to be readmitted within 30  
52  
53 318 days than those who did not. Previous research indicates that private patients are more likely  
54  
55 319 to attend rehabilitation than public patients [47] and that rehabilitation is associated with  
56  
57 320 better physical function after TKA [45]. However, we found no significant relationship  
58  
59  
60

1  
2  
3 321 between being a public or private patient and attendance at rehabilitation. Both groups in our  
4  
5 322 sample had similar rehabilitation opportunities, except for the provision of hydrotherapy after  
6  
7 323 six weeks indicating that private/public status was not a mediating factor for this finding.  
8  
9

10 324 This study showed no significant associations between general practice (GP) factors and  
11  
12 325 unplanned 30-day readmissions. A recent study reported that timely and regular GP contact  
13  
14 326 during the two years following transition from hospital to community care lowered the risk of  
15  
16 327 emergency readmission to hospital in patients with cardiovascular disease [48]. However, our  
17  
18 328 results might reflect the nature of the health condition. This cohort included people having  
19  
20 329 TKA as a treatment for severe pain for arthritis of the knee, which is quite different to other  
21  
22 330 diseases in that the treatment is potentially definitive and is followed up by the surgeon.  
23  
24  
25  
26

27 331 Although more than half of the patients who were readmitted had high scores for post-  
28  
29 332 hospital syndrome, there was no significant association with 30-day readmission. The  
30  
31 333 hypothesis of post-hospital syndrome describes a transient state resulting in consequences,  
32  
33 334 including a higher risk of readmission [11]. Brownlee et al. [49] found that post-hospital  
34  
35 335 syndrome was an independent predictor of readmission within 30 days of discharge in a large  
36  
37 336 cohort of surgical patients. While other studies have attempted to determine the impact of  
38  
39 337 post-hospital syndrome through linked hospital records data, [49, 50] this study is the first to  
40  
41 338 use patient-reported responses to quantify the effect of hospital experience (of pain, sleep,  
42  
43 339 and nutrition) on unplanned 30-day readmissions.  
44  
45  
46  
47  
48

49 340 There are limitations to this study. The main limitation was that there were fewer  
50  
51 341 readmissions than anticipated and the study may have been insufficiently powered for  
52  
53 342 detecting the associations being tested. The results were based on anonymous self-reports;  
54  
55 343 hence there was no capacity to link them to hospital data to establish actual readmission time  
56  
57 344 frames, length of hospital stay, reasons for readmission or previous admission history.  
58  
59  
60

1  
2  
3 345 However, our primary endpoint was 30-day readmission and we believe that the self-reported  
4  
5 346 data was accurate. The response rate is only an estimation based on joint replacement activity  
6  
7 347 in the ACT. It assumes that all patients returning for their six-week follow-up appointment  
8  
9 348 were invited to participate. We do not know whether the reception staff invited all patients, or  
10  
11 349 only some. The lack of information about non-responders is another limitation of this study.  
12  
13 350 More non-responders may have been readmitted and it is possible that they may have been  
14  
15 351 sicker than responders, which would also influence the readmission rate. Also, as the ACT  
16  
17 352 has a relatively high socioeconomic demographic the findings from this study may not apply  
18  
19 353 to other less affluent areas.  
20  
21  
22  
23

24 354 Our data do not allow us to understand why rehabilitation was not accessed. It is possible that  
25  
26 355 patients who were frailer did not feel able to participate and perhaps they were the patients  
27  
28 356 who were readmitted. However, a range of patient and provider-based factors have been  
29  
30 357 recognized as affecting the rehabilitation pathway chosen by patients, such as pre-operative  
31  
32 358 preferences, previous experiences, perceived benefits, clinical status post-surgery, as well as  
33  
34 359 insurance provider and hospital business model [51]. This association needs clarification.  
35  
36  
37  
38

39 360 It is not known if the rate of readmission can be reduced given the significant comorbidities  
40  
41 361 of the TKA patient sample.  
42  
43  
44  
45

46 362

## 47 363 **Conclusion**

48  
49 364

50  
51  
52 365 This study was undertaken to explore the factors impacting unplanned 30-day readmission  
53  
54 366 after TKA. These results have implications for policy and for practice. An over-  
55  
56 367 representation of public patients in the readmitted cohort is important. It is possible that the  
57  
58 368 extended periods of delay to surgery among patients on the public waiting list may be an  
59  
60

1  
2  
3 369 important factor. Therefore, it is essential to shorten waiting times and prioritize medical  
4  
5 370 need when dealing with public patients. Clinicians should also place emphasis on the  
6  
7 371 importance of attending rehabilitation after a TKA as an effective way to reduce 30-day  
8  
9 372 readmission. Further investigation of how the pre-surgical patient journey can be better  
10  
11 373 optimised to reduce readmission rates is warranted.  
12  
13  
14

15 374  
16  
17  
18  
19  
20  
21  
22  
23  
24  
25  
26  
27  
28  
29  
30  
31  
32  
33  
34  
35  
36  
37  
38  
39  
40  
41  
42  
43  
44  
45  
46  
47  
48  
49  
50  
51  
52  
53  
54  
55  
56  
57  
58  
59  
60

For peer review only



1  
2  
3 **375 Acknowledgement**  
4

5  
6 **376** We wish to thank Orthopaedics ACT and Dr Michael Gross from Canberra Hip and Knee  
7

8 **377** Replacement for their support with this project.  
9

10 **378**  
11

12  
13 **379 Competing interests**  
14

15  
16 **380** None declared.  
17

18  
19 **381**  
20

21  
22 **382 Funding**  
23

24  
25 **383** This research received no specific grant from any funding agency in the public, commercial  
26

27 **384** or not-for-profit sectors.  
28

29  
30 **385**  
31

32  
33 **386 Data sharing statement**  
34

35  
36 **387** Survey data and statistical analysis plans are available from Dr Desborough (ORCID ID:  
37

38 **388** 0000-0003-1406-4593) upon reasonable request.  
39

40  
41 **389**  
42

43  
44 **390 Figures**  
45

46  
47 **391** Figure 1. Receiver Operator Curve  
48  
49  
50  
51  
52  
53  
54  
55  
56  
57  
58  
59  
60

## 392 References

- 393 [1]. Bureau of Health Information. Spotlight on Measurement: Return to acute care  
394 following hospitalisation, Spotlight on Readmissions Sydney (NSW); BHI; 2015.,.
- 395 [2]. Dixit SK, Sambasivan M. A review of the Australian healthcare system: A policy  
396 perspective. *SAGE Open Medicine*. 2018;6:2050312118769211 DOI:  
397 10.1177/2050312118769211.
- 398 [3]. Australian Institute of Health and Welfare 2019. Admitted patient care 2017–18:  
399 Australian hospital statistics. Health services series no. 90. Cat. no. HSE 225. Canberra:  
400 AIHW.
- 401 [4]. McIlvennan CK, Eapen ZJ, Allen LA. Hospital readmissions reduction program.  
402 *Circulation*. 2015;131(20):1796-803 DOI: 10.1161/CIRCULATIONAHA.114.010270.
- 403 [5]. Ackerman IN, Bohensky MA, Zomer E, Tacey M, Gorelik A, Brand CA, et al. The  
404 projected burden of primary total knee and hip replacement for osteoarthritis in Australia to  
405 the year 2030. *BMC musculoskeletal disorders*. 2019;20(1):90- DOI: 10.1186/s12891-019-  
406 2411-9.
- 407 [6]. Benbassat J, Taragin M. Hospital Readmissions as a Measure of Quality of Health  
408 Care: Advantages and Limitations. *Archives of Internal Medicine*. 2000;160(8):1074-81  
409 DOI: 10.1001/archinte.160.8.1074.
- 410 [7]. Losina E, Thornhill TS, Rome BN, Wright J, Katz JN. The dramatic increase in total  
411 knee replacement utilization rates in the United States cannot be fully explained by growth in  
412 population size and the obesity epidemic. *J Bone Joint Surg Am*. 2012;94(3):201-7 DOI:  
413 10.2106/jbjs.J.01958.
- 414 [8]. Private Healthcare Australia. Pre-Budget submission 2017–18. 19 Jan 2017.  
415 [https://static.treasury.gov.au/uploads/sites/1/2017/06/C2016-052\\_Private-Healthcare-](https://static.treasury.gov.au/uploads/sites/1/2017/06/C2016-052_Private-Healthcare-Australia.pdf)  
416 [Australia.pdf](https://static.treasury.gov.au/uploads/sites/1/2017/06/C2016-052_Private-Healthcare-Australia.pdf) (viewed 4 June 2020).

- 1  
2  
3 417 [9]. Schairer WW, Vail TP, Bozic KJ. What are the rates and causes of hospital  
4  
5 418 readmission after total knee arthroplasty? *Clinical orthopaedics and related research*.  
6  
7 419 2014;472(1):181-7 DOI: 10.1007/s11999-013-3030-7.  
8  
9  
10 420 [10]. Leppin AL, Gionfriddo MR, Kessler M, Brito JP, Mair FS, Gallacher K, et al.  
11  
12 421 Preventing 30-day hospital readmissions: a systematic review and meta-analysis of  
13  
14 422 randomized trials. *JAMA internal medicine*. 2014;174(7):1095-107 DOI:  
15  
16 423 10.1001/jamainternmed.2014.1608.  
17  
18  
19 424 [11]. Krumholz HM. Post-hospital syndrome--an acquired, transient condition of  
20  
21 425 generalized risk. *The New England journal of medicine*. 2013;368(2):100-2 DOI:  
22  
23 426 10.1056/NEJMp1212324.  
24  
25  
26 427 [12]. Falster MO, Jorm LR, Douglas KA, Blyth FM, Elliott RF, Leyland AH.  
27  
28 428 Sociodemographic and health characteristics, rather than primary care supply, are major  
29  
30 429 drivers of geographic variation in preventable hospitalizations in Australia. *Med Care*.  
31  
32 430 2015;53(5):436-45 DOI: 10.1097/mlr.0000000000000342.  
33  
34  
35 431 [13]. Kossovsky MP, Sarasin FP, Perneger TV, Chopard P, Sigaud P, Gaspoz J. Unplanned  
36  
37 432 readmissions of patients with congestive heart failure: do they reflect in-hospital quality of  
38  
39 433 care or patient characteristics? *Am J Med*. 2000;109(5):386-90 DOI: 10.1016/s0002-  
40  
41 434 9343(00)00489-7.  
42  
43  
44 435 [14]. Einarsdóttir K, Preen DB, Emery JD, Kelman C, Holman CD. Regular primary care  
45  
46 436 lowers hospitalisation risk and mortality in seniors with chronic respiratory diseases. *J Gen*  
47  
48 437 *Intern Med*. 2010;25(8):766-73 DOI: 10.1007/s11606-010-1361-6.  
49  
50  
51 438 [15]. Cree M, Bell NR, Johnson D, Carriere KC. Increased continuity of care associated  
52  
53 439 with decreased hospital care and emergency department visits for patients with asthma. *Dis*  
54  
55 440 *Manag*. 2006;9(1):63-71 DOI: 10.1089/dis.2006.9.63.  
56  
57  
58  
59  
60

- 1  
2  
3 441 [16]. Tsai CL, Griswold SK, Clark S, Camargo CA, Jr. Factors associated with frequency  
4  
5 442 of emergency department visits for chronic obstructive pulmonary disease exacerbation. J  
6  
7 443 Gen Intern Med. 2007;22(6):799-804 DOI: 10.1007/s11606-007-0191-7.  
8  
9  
10 444 [17]. Howie JG, Heaney DJ, Maxwell M, Walker JJ. A comparison of a Patient Enablement  
11  
12 445 Instrument (PEI) against two established satisfaction scales as an outcome measure of  
13  
14 446 primary care consultations. Fam Pract. 1998;15(2):165-71 DOI: 10.1093/fampra/15.2.165.  
15  
16  
17 447 [18]. J. Desborough, S. Doi, and N. Glasgow, K. Douglas, C. Phillips, D. Cox, V.  
18  
19 448 Alexandric, A. Sedrakayn, Examining the interface between acute and primary care:  
20  
21 449 understanding unplanned 30-day readmissions, in Canberra Health Area Research Meeting.  
22  
23 450 2017: Canberra, Australia.  
24  
25  
26 451 [19] Groll DL, To T, Bombardier C, Wright JG. The development of a comorbidity index  
27  
28 452 with physical function as the outcome. Journal of Clinical Epidemiology. 2005;58(6):595-602  
29  
30 453 DOI: <https://doi.org/10.1016/j.jclinepi.2004.10.018>.  
31  
32  
33 454 [20]. Desborough J, Banfield M, Phillips C, Mills J. The process of patient enablement in  
34  
35 455 general practice nurse consultations: a grounded theory study. Journal of Advanced Nursing.  
36  
37 456 2017;73(5):1085-96 DOI: 10.1111/jan.13199.  
38  
39  
40 457 [21]. Hudon C, Fortin M, Rossignol F, Bernier S, Poitras M-E. The Patient Enablement  
41  
42 458 Instrument-French version in a family practice setting: a reliability study. BMC family  
43  
44 459 practice. 2011;12:71- DOI: 10.1186/1471-2296-12-71.  
45  
46  
47 460 [22]. StataCorp. 2019. Stata Statistical Software: Release 16. College Station, TX:  
48  
49 461 StataCorp LLC.  
50  
51 462 [23]. Foss AJE, Lamping DL, Schroter S, Hungerford J. Development and validation of a  
52  
53 463 patient based measure of outcome in ocular melanoma. British Journal of Ophthalmology.  
54  
55 464 2000;84(4):347 DOI: 10.1136/bjo.84.4.347.  
56  
57  
58  
59  
60

- 1  
2  
3 465 [24]. Desborough J, Bagheri N, Banfield M, Mills J, Phillips C, Korda R. The impact of  
4  
5 466 general practice nursing care on patient satisfaction and enablement in Australia: A mixed  
6  
7 467 methods study. *International Journal of Nursing Studies*. 2016;64:108-19 DOI:  
8  
9  
10 468 <https://doi.org/10.1016/j.ijnurstu.2016.10.004>.  
11  
12 469 [25]. Bowling A. *Research methods in health: investigating health and health services*:  
13  
14 470 McGraw-hill education (UK); 2014.  
15  
16 471 [26]. Mercer SW, Jani BD, Maxwell M, Wong SYS, Watt GCM. Patient enablement  
17  
18 472 requires physician empathy: a cross-sectional study of general practice consultations in areas  
19  
20 473 of high and low socioeconomic deprivation in Scotland. *BMC family practice*. 2012;13:6-  
21  
22 474 DOI: 10.1186/1471-2296-13-6.  
23  
24 475 [27]. Desborough J, Bagheri N, Banfield M, Mills J, Phillips C, Korda R. The impact of  
25  
26 476 general practice nursing care on patient satisfaction and enablement in Australia: A mixed  
27  
28 477 methods study. *International journal of nursing studies*. 2016;64:108-19 DOI:  
29  
30 478 10.1016/j.ijnurstu.2016.10.004.  
31  
32 479 [28]. Mercer SW, Jani BD, Maxwell M, Wong SY, Watt GC. Patient enablement requires  
33  
34 480 physician empathy: a cross-sectional study of general practice consultations in areas of high  
35  
36 481 and low socioeconomic deprivation in Scotland. *BMC Family Practice*. 2012;13(1):6 DOI:  
37  
38 482 10.1186/1471-2296-13-6.  
39  
40 483 [29]. Mercer SW, Neumann M, Wirtz M, Fitzpatrick B, Vojt G. General practitioner  
41  
42 484 empathy, patient enablement, and patient-reported outcomes in primary care in an area of  
43  
44 485 high socio-economic deprivation in Scotland--a pilot prospective study using structural  
45  
46 486 equation modeling. *Patient Educ Couns*. 2008;73(2):240-5 DOI: 10.1016/j.pec.2008.07.022.  
47  
48 487 [30]. Desborough J, Banfield M, Parker R. A tool to evaluate patients' experiences of  
49  
50 488 nursing care in Australian general practice: development of the Patient Enablement and  
51  
52 489 Satisfaction Survey. *Aust J Prim Health*. 2014;20(2):209-15 DOI: 10.1071/py12121.  
53  
54  
55  
56  
57  
58  
59  
60

- 1  
2  
3 490 [31]. Australian Commission on Safety and Quality in Health Care. Avoidable Hospital  
4  
5 491 Readmissions: Report on Australian and International indicators, their use and the efficacy of  
6  
7 492 interventions to reduce readmissions. Sydney: ACSQHC; 2019.
- 8  
9  
10 493 [32]. Cram P, Lu X, Kates SL, Singh JA, Li Y, Wolf BR. Total knee arthroplasty volume,  
11  
12 494 utilization, and outcomes among Medicare beneficiaries, 1991-2010. JAMA.  
13  
14 495 2012;308(12):1227-36 DOI: 10.1001/2012.jama.11153.
- 16  
17 496 [33]. Brown NM, Sheth NP, Davis K, Berend ME, Lombardi AV, Berend KR, et al. Total  
18  
19 497 Knee Arthroplasty Has Higher Postoperative Morbidity Than Unicompartmental Knee  
20  
21 498 Arthroplasty: A Multicenter Analysis. The Journal of Arthroplasty. 2012;27(8,  
22  
23 499 Supplement):86-90 DOI: <https://doi.org/10.1016/j.arth.2012.03.022>.
- 25  
26 500 [34]. Pawlikowska TRB, Nowak PR, Szumilo-Grzesik W, Walker JJ. Primary care reform:  
27  
28 501 a pilot study to test the evaluative potential of the Patient Enablement Instrument in Poland.  
29  
30 502 Family Practice. 2002;19(2):197-201 DOI: 10.1093/fampra/19.2.197.
- 32  
33 503 [35]. Australian Institute of Health and Welfare, 2018, My Hospitals website available at:  
34  
35 504 [https://www.myhospitals.gov.au/hospital/810000082/the-canberra-hospital/waiting-times-](https://www.myhospitals.gov.au/hospital/810000082/the-canberra-hospital/waiting-times-elective-surgery-intended-procedure)  
36  
37 505 [elective-surgery-intended-procedure](https://www.myhospitals.gov.au/hospital/810000082/the-canberra-hospital/waiting-times-elective-surgery-intended-procedure).
- 39  
40 506 [36]. Brennan SL, Lane SE, Lorimer M, Buchbinder R, Wluka AE, Page RS, et al.  
41  
42 507 Associations between socioeconomic status and primary total knee joint replacements  
43  
44 508 performed for osteoarthritis across Australia 2003–10: data from the Australian Orthopaedic  
45  
46 509 Association National Joint Replacement Registry. BMC Musculoskeletal Disorders.  
47  
48 510 2014;15(1):356 DOI: 10.1186/1471-2474-15-356.
- 50  
51 511 [37]. Desmeules F, Dionne CE, Belzile É L, Bourbonnais R, Frémont P. The impacts of  
52  
53 512 pre-surgery wait for total knee replacement on pain, function and health-related quality of life  
54  
55 513 six months after surgery. J Eval Clin Pract. 2012;18(1):111-20 DOI: 10.1111/j.1365-  
56  
57 514 2753.2010.01541.x.

- 1  
2  
3 515 [38]. Desmeules F, Dionne CE, Belzile E, Bourbonnais R, Frémont P. The burden of wait  
4  
5 516 for knee replacement surgery: effects on pain, function and health-related quality of life at the  
6  
7 517 time of surgery. *Rheumatology (Oxford)*. 2010;49(5):945-54 DOI:  
8  
9 518 10.1093/rheumatology/kep469.  
10  
11  
12 519 [39]. Keeney BJ, Koenig KM, Paddock NG, Moschetti WE, Sparks MB, Jevsevar DS. Do  
13  
14 520 Aggregate Socioeconomic Status Factors Predict Outcomes for Total Knee Arthroplasty in a  
15  
16 521 Rural Population? *The Journal of Arthroplasty*. 2017;32(12):3583-90 DOI:  
17  
18 522 10.1016/j.arth.2017.07.002.  
19  
20  
21 523 [40]. McCormack R, Michels R, Ramos N, Hutzler L, Slover JD, Bosco JA. Thirty-day  
22  
23 524 readmission rates as a measure of quality: causes of readmission after orthopedic surgeries  
24  
25 525 and accuracy of administrative data. *J Healthc Manag*. 2013;58(1):64-76; discussion -7.  
26  
27  
28 526 [41]. Australian Institute of Health and Welfare 2017. Admitted patient care 2015–16:  
29  
30 527 Australian hospital statistics. Health services series no.75. Cat. no. HSE 185. Canberra:  
31  
32 528 AIHW.  
33  
34  
35 529 [42]. Australian Institute of Health and Welfare 2018. Elective surgery waiting times 2017–  
36  
37 530 18: Australian hospital statistics. Health services series no. 88. Cat. no. HSE 215. Canberra:  
38  
39 531 AIHW.  
40  
41  
42 532 [43]. Lizaur-Utrilla A, Martinez-Mendez D, Miralles-Muñoz FA, Marco-Gomez L, Lopez-  
43  
44 533 Prats FA. Negative impact of waiting time for primary total knee arthroplasty on satisfaction  
45  
46 534 and patient-reported outcome. *International Orthopaedics*. 2016;40(11):2303-7 DOI:  
47  
48 535 10.1007/s00264-016-3209-0.  
49  
50  
51 536 [44]. Curtis AJ, Russell COH, Stoelwinder JU, McNeil JJ. Waiting lists and elective  
52  
53 537 surgery: ordering the queue. *Medical Journal of Australia*. 2010;192(4):217-20 DOI:  
54  
55 538 10.5694/j.1326-5377.2010.tb03482.x.  
56  
57  
58  
59  
60

- 1  
2  
3 539 [45]. Skou ST, Roos EM. Good Life with osteoArthritis in Denmark (GLA:D™): evidence-  
4  
5 540 based education and supervised neuromuscular exercise delivered by certified  
6  
7 541 physiotherapists nationwide. *BMC Musculoskelet Disord*. 2017;18(1):72 DOI:  
8  
9 542 10.1186/s12891-017-1439-y.  
10  
11  
12 543 [46]. Skou ST, Roos EM, Laursen MB, Rathleff MS, Arendt-Nielsen L, Simonsen O, et al.  
13  
14 544 A Randomized, Controlled Trial of Total Knee Replacement. *New England Journal of*  
15  
16 545 *Medicine*. 2015;373(17):1597-606 DOI: 10.1056/NEJMoa1505467.  
17  
18 546 [47]. Faux Steven; Shiner CW, Jane; Chia, Karen. Evaluating the role of rehabilitation for  
19  
20 547 lower limb joint replacement, deconditioning and cancer. Sydney: Department of  
21  
22 548 Rehabilitation Medicine, St Vincent's Hospital Sydney, Australia, (APHA) APHA.  
23  
24 549 [48]. Australian Institute of Health and Welfare 2018. Transition between hospital and  
25  
26 550 community care for patients with coronary heart disease: New South Wales and Victoria,  
27  
28 551 2012–2015. Cat. no. CDK 9. Canberra: AIHW.  
29  
30  
31 552 [49]. Brownlee SA, Blackwell RH, Blanco BA, Zapf MAC, Kliethermes S, Gupta GN, et  
32  
33 553 al. Impact of Post-Hospital Syndrome on Outcomes Following Elective, Ambulatory Surgery.  
34  
35 554 *Annals of surgery*. 2017;266(2):274-9 DOI: 10.1097/SLA.0000000000001965.  
36  
37  
38 555 [50]. Sadatsafavi M, Lynd LD, Fitzgerald JM. Post-hospital syndrome in adults with  
39  
40 556 asthma: a case-crossover study. *Allergy, asthma, and clinical immunology : official journal of*  
41  
42 557 *the Canadian Society of Allergy and Clinical Immunology*. 2013;9(1):49- DOI:  
43  
44 558 10.1186/1710-1492-9-49.  
45  
46  
47 559 [51]. Buhagiar MA, Naylor JM, Simpson G, Harris IA, Kohler F. Understanding consumer  
48  
49 560 and clinician preferences and decision making for rehabilitation following arthroplasty in the  
50  
51 561 private sector. *BMC Health Services Research*. 2017;17(1):415 DOI: 10.1186/s12913-017-  
52  
53 562 2379-9.  
54  
55  
56  
57  
58  
59 563  
60



564 Supplementary table 1. Results of univariate logistic regression analyses of variables  
 565 associated with unplanned 30-day readmission in patients who received total knee  
 566 arthroplasty

567

| <i>Odds Ratio</i>                           |           |               |                |
|---------------------------------------------|-----------|---------------|----------------|
| <i>Variables</i>                            | <i>OR</i> | <i>95% CI</i> | <i>p-value</i> |
| <i>Public vs Private</i>                    | 4.2       | 1.2-14.2      | 0.02           |
| <i>Comorbidities</i>                        |           |               |                |
| Arthritis <sup>#</sup>                      | 1.6       | 0.2-12.7      | 0.66           |
| Osteoporosis                                | 1.4       | 0.3-5.6       | 0.65           |
| Asthma                                      | 0.8       | 0.2-3.8       | 0.78           |
| COPD, ARDS, emphysema                       | 2.2       | 0.3-19.1      | 0.47           |
| Angina                                      | -         | -             | -              |
| Congestive heart failure (or heart disease) | 1.9       | 0.2-16.4      | 0.56           |
| Heart attack                                | -         | -             | -              |
| Neurological disease                        | -         | -             | -              |
| Stroke or TIA                               | 5.2       | 0.9-29.6      | 0.06           |
| Peripheral vascular disease                 | -         | -             | -              |
| Diabetes type I and II                      | 1.3       | 0.3-6.2       | 0.77           |
| Upper GI disease                            | 0.3       | 0.1-1.6       | 0.17           |
| Depression                                  | 0.8       | 0.2-3.9       | 0.77           |
| Anxiety or panic disorders                  | 1.7       | 0.5-8.5       | 0.29           |
| Visual impairment                           | 1.0       | 0.3-3.7       | 0.98           |
| Hearing impairment                          | 1.3       | 0.3-6.0       | 0.80           |
| Degenerative disc disease                   | 1.6       | 0.5-5.4       | 0.44           |
| <i>Morbidity scale</i>                      | 1.4       | 0.7-2.8       | 0.40           |
| 0                                           | -         | -             | -              |

29

|                                                      |     |           |       |
|------------------------------------------------------|-----|-----------|-------|
| 1                                                    | 0.6 | 0.1-2.9   | 0.56  |
| 2                                                    | 0.4 | 0.1-2.3   | 0.32  |
| 3 or more                                            | -   | -         | -     |
| <i>Self-Rated Health</i>                             |     |           |       |
| <i>Before you went to hospital</i>                   |     |           |       |
| Invited to attend session by surgeon                 | 0.5 | 0.1-1.5   | 0.21  |
| Attended information session                         | 1.0 | 0.3-3.2   | 0.99  |
| Usefulness of pre-surgery information session        | 0.7 | 0.3-1.9   | 0.53  |
| Given information package or checklist               | 0.2 | 0.03-0.82 | 0.03  |
| Use of information package or checklist              | -   | -         | -     |
| <i>Pain</i>                                          |     |           |       |
| Worst pain (more than six score)                     | 1.5 | 0.4-5.7   | 0.51  |
| Pain experienced during hospital stay (general pain) | 4.7 | 1.0-21.6  | 0.05  |
| Pain on discharge (less than 6)                      | 5.0 | 1.3-18.4  | 0.016 |
| Medication for pain control                          | 0.4 | 0.1-1.7   | 0.20  |
| Pain management with ice                             | 0.9 | 0.2-4.2   | 0.90  |
| Breathing exercise                                   | 1.9 | 0.6-6.2   | 0.30  |
| <i>Sleep</i>                                         |     |           |       |
| Single/shared room (single)                          | 1.4 | 0.4-4.8   | 0.55  |
| Quality of sleep (Poor)                              | 1.2 | 0.4-4.0   | 0.80  |
| Medication for sleep                                 | 1.2 | 0.4-3.9   | 0.71  |

|    |                                     |     |          |      |
|----|-------------------------------------|-----|----------|------|
| 1  |                                     |     |          |      |
| 2  |                                     |     |          |      |
| 3  |                                     |     |          |      |
| 4  | Feel rested when leaving            | 1.5 | 0.5-4.5  | 0.50 |
| 5  | hospital                            |     |          |      |
| 6  |                                     |     |          |      |
| 7  | Dietary requirement met             | 0.4 | 0.1-3.3  | 0.41 |
| 8  |                                     |     |          |      |
| 9  | Water in reach                      | 3.5 | 0.7-17.1 | 0.12 |
| 10 |                                     |     |          |      |
| 11 | Quality of food in                  | 0.5 | 0.1-4.0  | 0.52 |
| 12 | hospital(average)                   |     |          |      |
| 13 |                                     |     |          |      |
| 14 |                                     |     |          |      |
| 15 | <i>Discussion of medications</i>    | 0.5 | 0.1-2.1  | 0.38 |
| 16 | <i>with health care provider</i>    |     |          |      |
| 17 | <i>Patient medication</i>           |     |          |      |
| 18 | <i>enablement</i>                   |     |          |      |
| 19 |                                     |     |          |      |
| 20 | Better understand use of            | 0.4 | 0.1-3.6  | 0.44 |
| 21 | medication                          |     |          |      |
| 22 |                                     |     |          |      |
| 23 | Feel more confident about           | 0.7 | 0.1-6.2  | 0.80 |
| 24 | taking medications                  |     |          |      |
| 25 |                                     |     |          |      |
| 26 | Take your medications               | 0.5 | 0.1-4.0  | 0.48 |
| 27 |                                     |     |          |      |
| 28 | <i>Total medication</i>             | 0.9 | 0.6-1.4  | 0.59 |
| 29 | <i>enablement (medication</i>       |     |          |      |
| 30 | <i>scale)</i>                       |     |          |      |
| 31 | <i>Patient enablement</i>           |     |          |      |
| 32 |                                     |     |          |      |
| 33 | Able to cope with life              | 0.7 | 0.3-1.6  | 0.46 |
| 34 |                                     |     |          |      |
| 35 | Able to understand your             | 0.9 | 0.4-1.2  | 0.81 |
| 36 | condition                           |     |          |      |
| 37 |                                     |     |          |      |
| 38 | Able to cope with your              | 0.8 | 0.3-1.7  | 0.50 |
| 39 | condition                           |     |          |      |
| 40 |                                     |     |          |      |
| 41 | Able to keep yourself               | 1.2 | 0.5-2.6  | 0.65 |
| 42 | healthy                             |     |          |      |
| 43 |                                     |     |          |      |
| 44 | Confident about your health         | 0.6 | 0.3-1.4  | 0.25 |
| 45 |                                     |     |          |      |
| 46 | Able to help yourself               | 1.3 | 0.6-2.8  | 0.54 |
| 47 |                                     |     |          |      |
| 48 | <i>Total enablement score (less</i> | 1.0 | 0.3-3.3  | 0.96 |
| 49 | <i>enabled)</i>                     |     |          |      |
| 50 |                                     |     |          |      |
| 51 |                                     |     |          |      |
| 52 |                                     |     |          |      |
| 53 |                                     |     |          |      |
| 54 |                                     |     |          |      |
| 55 |                                     |     |          |      |
| 56 |                                     |     |          |      |
| 57 |                                     |     |          |      |
| 58 |                                     |     |          |      |
| 59 |                                     |     |          |      |
| 60 |                                     |     |          |      |

1  
2  
3  
4 *When you got home from*

5 *hospital*

6  
7 Recall being given 0.8 0.2-3.8 0.79

8 information about who to

9 contact

10  
11  
12 *Who were you instructed to* 0.8 0.6-1.0 0.05

13 *contact?*

14  
15  
16 *Go to ED within 30 days of* 42.5 10.9-164.8 0.00

17 *discharge*

18  
19  
20 *Readmitted within 30 days* - - -

21 *of discharge*

22  
23  
24 *General Practice Questions*

25  
26 *Regular GP practice* - - -

27  
28 *See the same doctor* 0.3 0.0-3.0 0.33

29  
30 *Regular appointments with* 1.2 0.4-3.7 0.76

31 *GP*

32  
33  
34 *Discussion of plan with GP* 0.7 0.2-2.2 0.50

35  
36 *When were you advised to* 1.9 0.2-14.7 0.56

37 *see GP next*

38  
39  
40 *Usual waiting time to see* 0.9 0.4-1.8 0.80

41 *GP*

42  
43  
44 *How soon after surgery did* 0.9 0.4-1.8 0.80

45 *you see GP*

46  
47 *Attendance to rehab* 0.1 0.0-0.4 0.001

48 *program*

49  
50  
51 *Attendance to rehab within* 2.2 0.8-5.5 0.11

52 *5 days*

53  
54  
55 *Length of attendance to* 0.9 0.5-1.5 0.60

56 *rehab*

57  
58 568

59  
60  
32

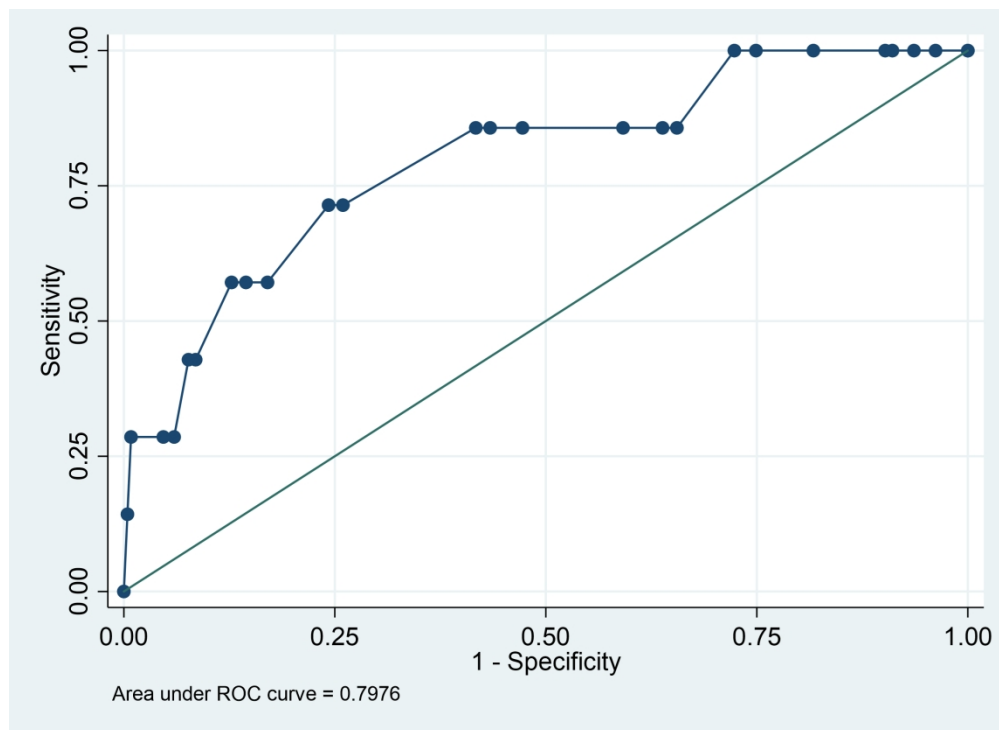

Figure 1. Receiver Operator Curve

272x198mm (236 x 236 DPI)

Supplementary table 1. Results of univariate logistic regression analyses of variables associated with unplanned 30-day readmission in patients who received total knee arthroplasty

| <i>Variables</i>                            | <i>Odds Ratio</i> |               |                |
|---------------------------------------------|-------------------|---------------|----------------|
|                                             | <i>OR</i>         | <i>95% CI</i> | <i>p-value</i> |
| <i>Public vs Private</i>                    | 4.2               | 1.2-14.2      | 0.02           |
| <i>Comorbidities</i>                        |                   |               |                |
| Arthritis <sup>#</sup>                      | 1.6               | 0.2-12.7      | 0.66           |
| Osteoporosis                                | 1.4               | 0.3-5.6       | 0.65           |
| Asthma                                      | 0.8               | 0.2-3.8       | 0.78           |
| COPD, ARDS, emphysema                       | 2.2               | 0.3-19.1      | 0.47           |
| Angina                                      | -                 | -             | -              |
| Congestive heart failure (or heart disease) | 1.9               | 0.2-16.4      | 0.56           |
| Heart attack                                | -                 | -             | -              |
| Neurological disease                        | -                 | -             | -              |
| Stroke or TIA                               | 5.2               | 0.9-29.6      | 0.06           |
| Peripheral vascular disease                 | -                 | -             | -              |
| Diabetes type I and II                      | 1.3               | 0.3-6.2       | 0.77           |
| Upper GI disease                            | 0.3               | 0.1-1.6       | 0.17           |
| Depression                                  | 0.8               | 0.2-3.9       | 0.77           |
| Anxiety or panic disorders                  | 1.7               | 0.5-8.5       | 0.29           |
| Visual impairment                           | 1.0               | 0.3-3.7       | 0.98           |
| Hearing impairment                          | 1.3               | 0.3-6.0       | 0.80           |
| Degenerative disc disease                   | 1.6               | 0.5-5.4       | 0.44           |
| <i>Morbidity scale</i>                      | 1.4               | 0.7-2.8       | 0.40           |

|                                                      |     |           |       |
|------------------------------------------------------|-----|-----------|-------|
| 0                                                    | -   | -         | -     |
| 1                                                    | 0.6 | 0.1-2.9   | 0.56  |
| 2                                                    | 0.4 | 0.1-2.3   | 0.32  |
| 3 or more                                            | -   | -         | -     |
| <i>Self-Rated Health</i>                             | 0.5 | 0.2-1.0   | 0.04  |
| <i>Before you went to hospital</i>                   |     |           |       |
| <i>Invited to attend session by surgeon</i>          | 0.5 | 0.1-1.5   | 0.21  |
| <i>Attended information session</i>                  | 1.0 | 0.3-3.2   | 0.99  |
| <i>Usefulness of pre-surgery information session</i> | 0.7 | 0.3-1.9   | 0.53  |
| Given information package or checklist               | 0.2 | 0.03-0.82 | 0.03  |
| Use of information package or checklist              | -   | -         | -     |
| <i>Pain</i>                                          | -   | -         | -     |
| Worst pain (more than six score)                     | 1.5 | 0.4-5.7   | 0.51  |
| Pain experienced during hospital stay (general pain) | 4.7 | 1.0-21.6  | 0.05  |
| Pain on discharge (less than 6)                      | 5.0 | 1.3-18.4  | 0.016 |
| <i>Medication for pain control</i>                   | 0.4 | 0.1-1.7   | 0.20  |
| Pain management with ice                             | 0.9 | 0.2-4.2   | 0.90  |
| Breathing exercise                                   | 1.9 | 0.6-6.2   | 0.30  |
| <i>Sleep</i>                                         |     |           |       |
| Single/shared room (single)                          | 1.4 | 0.4-4.8   | 0.55  |

|                                                            |     |          |      |
|------------------------------------------------------------|-----|----------|------|
| Quality of sleep (Poor)                                    | 1.2 | 0.4-4.0  | 0.80 |
| Medication for sleep                                       | 1.2 | 0.4-3.9  | 0.71 |
| Feel rested when leaving hospital                          | 1.5 | 0.5-4.5  | 0.50 |
| Dietary requirement met                                    | 0.4 | 0.1-3.3  | 0.41 |
| Water in reach                                             | 3.5 | 0.7-17.1 | 0.12 |
| Quality of food in hospital(average)                       | 0.5 | 0.1-4.0  | 0.52 |
| <i>Discussion of medications with health care provider</i> | 0.5 | 0.1-2.1  | 0.38 |
| <i>Patient medication enablement</i>                       |     |          |      |
| Better understand use of medication                        | 0.4 | 0.1-3.6  | 0.44 |
| Feel more confident about taking medications               | 0.7 | 0.1-6.2  | 0.80 |
| Take your medications                                      | 0.5 | 0.1-4.0  | 0.48 |
| <i>Total medication enablement (medication scale)</i>      | 0.9 | 0.6-1.4  | 0.59 |
| <i>Patient enablement</i>                                  |     |          |      |
| Able to cope with life                                     | 0.7 | 0.3-1.6  | 0.46 |
| Able to understand your condition                          | 0.9 | 0.4-1.2  | 0.81 |
| Able to cope with your condition                           | 0.8 | 0.3-1.7  | 0.50 |
| Able to keep yourself healthy                              | 1.2 | 0.5-2.6  | 0.65 |



|                                                     |      |            |      |
|-----------------------------------------------------|------|------------|------|
| Confident about your health                         | 0.6  | 0.3-1.4    | 0.25 |
| Able to help yourself                               | 1.3  | 0.6-2.8    | 0.54 |
| <i>Total enablement score (less enabled)</i>        | 1.0  | 0.3-3.3    | 0.96 |
| <i>When you got home from hospital</i>              |      |            |      |
| Recall being given information about who to contact | 0.8  | 0.2-3.8    | 0.79 |
| <i>Who were you instructed to contact?</i>          | 0.8  | 0.6-1.0    | 0.05 |
| <i>Go to ED within 30 days of discharge</i>         | 42.5 | 10.9-164.8 | 0.00 |
| <i>Readmitted within 30 days of discharge</i>       | -    | -          | -    |
| <i>General Practice Questions</i>                   |      |            |      |
| Regular GP practice                                 | -    | -          | -    |
| <i>See the same doctor</i>                          | 0.3  | 0.0-3.0    | 0.33 |
| <i>Regular appointments with GP</i>                 | 1.2  | 0.4-3.7    | 0.76 |
| <i>Discussion of plan with GP</i>                   | 0.7  | 0.2-2.2    | 0.50 |
| <i>When were you advised to see GP next</i>         | 1.9  | 0.2-14.7   | 0.56 |
| <i>Usual waiting time to see GP</i>                 | 0.9  | 0.4-1.8    | 0.80 |
| <i>How soon after surgery did you see GP</i>        | 0.9  | 0.4-1.8    | 0.80 |

|    |                                   |     |         |       |
|----|-----------------------------------|-----|---------|-------|
| 1  |                                   |     |         |       |
| 2  |                                   |     |         |       |
| 3  |                                   |     |         |       |
| 4  | <i>Attendance to rehab</i>        | 0.1 | 0.0-0.4 | 0.001 |
| 5  | <i>program</i>                    |     |         |       |
| 6  |                                   |     |         |       |
| 7  | <i>Attendance to rehab within</i> | 2.2 | 0.8-5.5 | 0.11  |
| 8  | <i>5 days</i>                     |     |         |       |
| 9  |                                   |     |         |       |
| 10 |                                   |     |         |       |
| 11 | <i>Length of attendance to</i>    | 0.9 | 0.5-1.5 | 0.60  |
| 12 | <i>rehab</i>                      |     |         |       |
| 13 |                                   |     |         |       |
| 14 |                                   |     |         |       |
| 15 |                                   |     |         |       |
| 16 |                                   |     |         |       |
| 17 |                                   |     |         |       |
| 18 |                                   |     |         |       |
| 19 |                                   |     |         |       |
| 20 |                                   |     |         |       |
| 21 |                                   |     |         |       |
| 22 |                                   |     |         |       |
| 23 |                                   |     |         |       |
| 24 |                                   |     |         |       |
| 25 |                                   |     |         |       |
| 26 |                                   |     |         |       |
| 27 |                                   |     |         |       |
| 28 |                                   |     |         |       |
| 29 |                                   |     |         |       |
| 30 |                                   |     |         |       |
| 31 |                                   |     |         |       |
| 32 |                                   |     |         |       |
| 33 |                                   |     |         |       |
| 34 |                                   |     |         |       |
| 35 |                                   |     |         |       |
| 36 |                                   |     |         |       |
| 37 |                                   |     |         |       |
| 38 |                                   |     |         |       |
| 39 |                                   |     |         |       |
| 40 |                                   |     |         |       |
| 41 |                                   |     |         |       |
| 42 |                                   |     |         |       |
| 43 |                                   |     |         |       |
| 44 |                                   |     |         |       |
| 45 |                                   |     |         |       |
| 46 |                                   |     |         |       |
| 47 |                                   |     |         |       |
| 48 |                                   |     |         |       |
| 49 |                                   |     |         |       |
| 50 |                                   |     |         |       |
| 51 |                                   |     |         |       |
| 52 |                                   |     |         |       |
| 53 |                                   |     |         |       |
| 54 |                                   |     |         |       |
| 55 |                                   |     |         |       |
| 56 |                                   |     |         |       |
| 57 |                                   |     |         |       |
| 58 |                                   |     |         |       |
| 59 |                                   |     |         |       |
| 60 |                                   |     |         |       |

For peer review only

**STROBE 2007 (v4) Statement—Checklist of items that should be included in reports of *cross-sectional studies***

| Section/Topic                | Item # | Recommendation                                                                                                                                                                       | Reported on page # |
|------------------------------|--------|--------------------------------------------------------------------------------------------------------------------------------------------------------------------------------------|--------------------|
| <b>Title and abstract</b>    | 1      | (a) Indicate the study's design with a commonly used term in the title or the abstract                                                                                               | 1-3                |
|                              |        | (b) Provide in the abstract an informative and balanced summary of what was done and what was found                                                                                  | 3                  |
| <b>Introduction</b>          |        |                                                                                                                                                                                      |                    |
| Background/rationale         | 2      | Explain the scientific background and rationale for the investigation being reported                                                                                                 | 5,6                |
| Objectives                   | 3      | State specific objectives, including any prespecified hypotheses                                                                                                                     | 6                  |
| <b>Methods</b>               |        |                                                                                                                                                                                      |                    |
| Study design                 | 4      | Present key elements of study design early in the paper                                                                                                                              | 7                  |
| Setting                      | 5      | Describe the setting, locations, and relevant dates, including periods of recruitment, exposure, follow-up, and data collection                                                      | 6,7,8              |
| Participants                 | 6      | (a) Give the eligibility criteria, and the sources and methods of selection of participants                                                                                          | 6                  |
| Variables                    | 7      | Clearly define all outcomes, exposures, predictors, potential confounders, and effect modifiers. Give diagnostic criteria, if applicable                                             | 7,8                |
| Data sources/<br>measurement | 8*     | For each variable of interest, give sources of data and details of methods of assessment (measurement). Describe comparability of assessment methods if there is more than one group | 7,8                |
| Bias                         | 9      | Describe any efforts to address potential sources of bias                                                                                                                            | 9                  |
| Study size                   | 10     | Explain how the study size was arrived at                                                                                                                                            | 7                  |
| Quantitative variables       | 11     | Explain how quantitative variables were handled in the analyses. If applicable, describe which groupings were chosen and why                                                         | 8,9,10             |
| Statistical methods          | 12     | (a) Describe all statistical methods, including those used to control for confounding                                                                                                | 8,9,10             |
|                              |        | (b) Describe any methods used to examine subgroups and interactions                                                                                                                  | 8,9,10             |
|                              |        | (c) Explain how missing data were addressed                                                                                                                                          | 10                 |
|                              |        | (d) If applicable, describe analytical methods taking account of sampling strategy                                                                                                   | 10                 |
|                              |        | (e) Describe any sensitivity analyses                                                                                                                                                | 10                 |
| <b>Results</b>               |        |                                                                                                                                                                                      |                    |

|                          |     |                                                                                                                                                                                                              |               |
|--------------------------|-----|--------------------------------------------------------------------------------------------------------------------------------------------------------------------------------------------------------------|---------------|
| Participants             | 13* | (a) Report numbers of individuals at each stage of study—eg numbers potentially eligible, examined for eligibility, confirmed eligible, included in the study, completing follow-up, and analysed            | 11            |
|                          |     | (b) Give reasons for non-participation at each stage                                                                                                                                                         | Not available |
|                          |     | (c) Consider use of a flow diagram                                                                                                                                                                           |               |
| Descriptive data         | 14* | (a) Give characteristics of study participants (eg demographic, clinical, social) and information on exposures and potential confounders                                                                     | Table 1       |
|                          |     | (b) Indicate number of participants with missing data for each variable of interest                                                                                                                          | Table 1       |
| Outcome data             | 15* | Report numbers of outcome events or summary measures                                                                                                                                                         | Tables 1-3    |
| Main results             | 16  | (a) Give unadjusted estimates and, if applicable, confounder-adjusted estimates and their precision (eg, 95% confidence interval). Make clear which confounders were adjusted for and why they were included | 11,12         |
|                          |     | (b) Report category boundaries when continuous variables were categorized                                                                                                                                    | 11,12         |
|                          |     | (c) If relevant, consider translating estimates of relative risk into absolute risk for a meaningful time period                                                                                             |               |
| Other analyses           | 17  | Report other analyses done—eg analyses of subgroups and interactions, and sensitivity analyses                                                                                                               | 11,12         |
| <b>Discussion</b>        |     |                                                                                                                                                                                                              |               |
| Key results              | 18  | Summarise key results with reference to study objectives                                                                                                                                                     | 13,14,15      |
| Limitations              | 19  | Discuss limitations of the study, taking into account sources of potential bias or imprecision. Discuss both direction and magnitude of any potential bias                                                   | 15,16         |
| Interpretation           | 20  | Give a cautious overall interpretation of results considering objectives, limitations, multiplicity of analyses, results from similar studies, and other relevant evidence                                   | 16            |
| Generalisability         | 21  | Discuss the generalisability (external validity) of the study results                                                                                                                                        | 15,16         |
| <b>Other information</b> |     |                                                                                                                                                                                                              |               |
| Funding                  | 22  | Give the source of funding and the role of the funders for the present study and, if applicable, for the original study on which the present article is based                                                | 17            |

\*Give information separately for cases and controls in case-control studies and, if applicable, for exposed and unexposed groups in cohort and cross-sectional studies.

**Note:** An Explanation and Elaboration article discusses each checklist item and gives methodological background and published examples of transparent reporting. The STROBE checklist is best used in conjunction with this article (freely available on the Web sites of PLoS Medicine at <http://www.plosmedicine.org/>, Annals of Internal Medicine at <http://www.annals.org/>, and Epidemiology at <http://www.epidem.com/>). Information on the STROBE Initiative is available at [www.strobe-statement.org](http://www.strobe-statement.org).

# BMJ Open

## Understanding Factors affecting 30-day Unplanned Readmissions for Patients undergoing Total Knee Arthroplasty (TKA): The ACT Transition from Hospital to Home Orthopaedics Survey

|                                 |                                                                                                                                                                                                                                                                                                                                                                                                                                                                                                                                                                                                                                                                                                                                                                           |
|---------------------------------|---------------------------------------------------------------------------------------------------------------------------------------------------------------------------------------------------------------------------------------------------------------------------------------------------------------------------------------------------------------------------------------------------------------------------------------------------------------------------------------------------------------------------------------------------------------------------------------------------------------------------------------------------------------------------------------------------------------------------------------------------------------------------|
| Journal:                        | <i>BMJ Open</i>                                                                                                                                                                                                                                                                                                                                                                                                                                                                                                                                                                                                                                                                                                                                                           |
| Manuscript ID                   | bmjopen-2021-053831.R2                                                                                                                                                                                                                                                                                                                                                                                                                                                                                                                                                                                                                                                                                                                                                    |
| Article Type:                   | Original research                                                                                                                                                                                                                                                                                                                                                                                                                                                                                                                                                                                                                                                                                                                                                         |
| Date Submitted by the Author:   | 14-Mar-2022                                                                                                                                                                                                                                                                                                                                                                                                                                                                                                                                                                                                                                                                                                                                                               |
| Complete List of Authors:       | Chhabra, Madhur; Australian National University, Department of Health Services and Research<br>Perriman, Diana; ACT Health, Trauma & Orthopaedic Research Unit; Australian National University Medical School<br>Phillips, Christine; Australian National University Medical School<br>Parkinson, Anne; Australian National University, Health Services Research and Policy<br>Glasgow, Nicholas; Australian National University Medical School<br>Douglas, Kirsty; Australian National University Medical School<br>Cox, Darlene; Health Care Consumers Association, ACT<br>Smith, Paul; ACT Health, Trauma and Orthopaedic Unit; Australian National University Medical School<br>Desborough, Jane; Australian National University, Health Services Research and Policy |
| <b>Primary Subject Heading</b>: | Health services research                                                                                                                                                                                                                                                                                                                                                                                                                                                                                                                                                                                                                                                                                                                                                  |
| Secondary Subject Heading:      | Surgery                                                                                                                                                                                                                                                                                                                                                                                                                                                                                                                                                                                                                                                                                                                                                                   |
| Keywords:                       | Knee < ORTHOPAEDIC & TRAUMA SURGERY, Health policy < HEALTH SERVICES ADMINISTRATION & MANAGEMENT, Quality in health care < HEALTH SERVICES ADMINISTRATION & MANAGEMENT                                                                                                                                                                                                                                                                                                                                                                                                                                                                                                                                                                                                    |
|                                 |                                                                                                                                                                                                                                                                                                                                                                                                                                                                                                                                                                                                                                                                                                                                                                           |

SCHOLARONE™  
Manuscripts



I, the Submitting Author has the right to grant and does grant on behalf of all authors of the Work (as defined in the below author licence), an exclusive licence and/or a non-exclusive licence for contributions from authors who are: i) UK Crown employees; ii) where BMJ has agreed a CC-BY licence shall apply, and/or iii) in accordance with the terms applicable for US Federal Government officers or employees acting as part of their official duties; on a worldwide, perpetual, irrevocable, royalty-free basis to BMJ Publishing Group Ltd ("BMJ") its licensees and where the relevant Journal is co-owned by BMJ to the co-owners of the Journal, to publish the Work in this journal and any other BMJ products and to exploit all rights, as set out in our [licence](#).

The Submitting Author accepts and understands that any supply made under these terms is made by BMJ to the Submitting Author unless you are acting as an employee on behalf of your employer or a postgraduate student of an affiliated institution which is paying any applicable article publishing charge ("APC") for Open Access articles. Where the Submitting Author wishes to make the Work available on an Open Access basis (and intends to pay the relevant APC), the terms of reuse of such Open Access shall be governed by a Creative Commons licence – details of these licences and which [Creative Commons](#) licence will apply to this Work are set out in our licence referred to above.

Other than as permitted in any relevant BMJ Author's Self Archiving Policies, I confirm this Work has not been accepted for publication elsewhere, is not being considered for publication elsewhere and does not duplicate material already published. I confirm all authors consent to publication of this Work and authorise the granting of this licence.

1                   **Understanding Factors affecting 30-day Unplanned Readmissions for Patients**  
2  
3  
4                   **undergoing Total Knee Arthroplasty (TKA): The ACT Transition from Hospital to**  
5  
6                   **Home Orthopaedics Survey**  
7  
8

9  
10           **Running title:** Unplanned readmissions following knee arthroplasty  
11  
12

13           **Authors:**  
14

15  
16           Madhur Chhabra<sup>a</sup>, Diana Perriman<sup>b,c</sup>, Christine Phillips<sup>c</sup>, Anne Parkinson<sup>a</sup>, Nicholas  
17  
18           Glasgow<sup>c</sup>, Kirsty Douglas<sup>c</sup>, Darlene Cox<sup>d</sup>, Paul Smith<sup>b,c</sup>, Jane Desborough<sup>a</sup>.  
19  
20

21           **Listed author contributions:**  
22

23  
24           Madhur Chhabra<sup>a</sup>: data collection, analysis, drafting and finalising of manuscript;  
25  
26

27  
28           Diana Perriman<sup>b,c</sup>: data collection and analysis, significant contributions to final manuscript,  
29

30           Christine Phillips<sup>c</sup>: survey development, significant contributions to final manuscript  
31  
32

33           Anne Parkinson<sup>a</sup>: data collection, significant contributions to final manuscript,  
34

35  
36           Nicholas Glasgow<sup>c</sup>: survey development, significant contributions to final manuscript;  
37  
38

39           Kirsty Douglas<sup>c</sup>: survey development, significant contributions to final manuscript;  
40  
41

42           Darlene Cox<sup>d</sup>: survey development, contributions to final manuscript;  
43  
44

45           Paul Smith<sup>b,c</sup>: survey development, significant contributions to final manuscript,  
46  
47

48           Jane Desborough<sup>a</sup>: study conception and survey design, data collection, supervised data  
49  
50           analysis, significant contributions to final manuscript.  
51  
52

53           **Listed author affiliations:**  
54  
55  
56  
57  
58  
59  
60

- 1  
2  
3 20 a. Department of Health Services, Research and Policy, Research School of Population  
4  
5 21 Health, College of Health and Medicine, Australian National University, Canberra, ACT,  
6  
7 22 Australia  
8  
9  
10 23 b. Trauma and Orthopaedic Research Unit, ACT Health  
11  
12  
13 24 c. Australian National University Medical School, College of Health and Medicine,  
14  
15 25 Australian National University, Canberra, Australian Capital Territory (ACT), Australia  
16  
17  
18 26 d. Health Care Consumers Association, ACT  
19  
20  
21  
22 27 **Corresponding author:** Madhur Chhabra, madhur.chhabra@anu.edu.au , 0449894092  
23  
24  
25 28 Department of Health Services, Research and Policy, Research School of Population Health,  
26  
27 29 63 Eggleston Road, College of Health and Medicine, Australian National University,  
28  
29 30 Canberra, ACT (2601), Australia  
30  
31  
32 31 **All authors have read and approve the manuscript below**  
33  
34  
35  
36  
37  
38  
39  
40  
41  
42  
43  
44  
45  
46  
47  
48  
49  
50  
51  
52  
53  
54  
55  
56  
57  
58  
59  
60



## 32 Abstract

### 33 Objectives

34 The aim of this study was to investigate factors associated with unplanned 30-day  
35 readmissions following a TKA, including association with post-hospital syndrome, patient  
36 enablement, and transition from hospital to home.

### 37 Design, setting and participants

38 A cross-sectional written survey of public and private patients attending a six-week follow-up  
39 appointment after TKA at one of four clinical services in the Australian Capital Territory  
40 (ACT) between 1 February 2018 and 31 January 2019. Multiple logistic regression analyses  
41 were used to measure associations between patient, hospital and transitional care factors with  
42 unplanned 30-day readmissions, whilst controlling for known confounders.

### 43 Results

44 Of the 380 participants who completed the survey (n=380, 54% of TKAs undertaken over the  
45 study period), 3.4% (n=13; 95% confidence interval; 1.8 – 5.8) were subsequently readmitted  
46 within 30 days of discharge after a primary hospitalization. Public patients were significantly  
47 more likely to be readmitted within 30 days compared to private patients (adjusted OR=6.31,  
48 95% CI:1.59-25.14, p=0.009), and patients who attended rehabilitation were significantly less  
49 likely to be readmitted within 30 days of discharge than those who did not (adjusted  
50 OR=0.16, 95% CI: 0.04-0.57, p=0.005). There were no associations between post-hospital  
51 syndrome or patient enablement and 30-day readmissions in this study.

### 52 Conclusion

1  
2  
3 53 Reasons underlying the difference in unplanned readmission rates for public versus private  
4  
5 54 patients need to be explored, including differences in surgical waiting times and the  
6  
7 55 consequences for impairment and disease complexity. Strategies to foster increased  
8  
9  
10 56 participation post-surgical rehabilitation programs need to be developed as an avenue to  
11  
12 57 mitigate the burden of unplanned 30-day readmissions on individuals and health systems.  
13  
14

15  
16 58 **Keywords:** knee arthroplasty, 30-day readmission, post-hospital syndrome, transitional care,  
17  
18 59 hospital performance.  
19

20  
21 60 **ARTICLE SUMMARY**  
22

- 23  
24 61 • A survey, co-designed with clinicians and patients, examined associations between  
25  
26 62 patient, hospital and transitional care factors and unplanned 30-day readmission  
27  
28 63 following total knee arthroplasty in both public and private hospital settings.  
29  
30  
31 64 • This study is the first to use patient-reported responses to quantify the effect of  
32  
33 65 hospital experience of pain, sleep, and nutrition in unplanned 30-day readmissions  
34  
35 66 following total knee arthroplasty.  
36  
37  
38 67 • A limitation of this study is that results were based on self-reported patient outcomes  
39  
40 68 with no capacity to link them to hospital records for confirmation as well as the lack  
41  
42 69 of information from those who declined the survey.  
43  
44

45 70  
46  
47  
48  
49  
50  
51  
52  
53  
54  
55  
56  
57  
58  
59  
60

## 71 **Introduction**

72 Unplanned readmission rates are an indicator of health system performance [1, 2]. The rate of  
73 unplanned 30-day readmission for total knee arthroplasty (TKA) in Australian public  
74 hospitals was 2.6% in 2017-18 [3]. In the United States, readmission rates have been used as  
75 an incentive to reduce readmission and drive improved practice [4]. While there is no such  
76 program in Australia, the economic burden of unplanned readmissions makes it a policy  
77 priority [3, 5, 6].

78 The rate of knee replacement surgery has more than doubled over the past 15 years both in  
79 Australia and internationally [7] with the highest rate of increase seen in the private sector [3,  
80 5, 8]. This growing demand has placed increased logistical and financial strain on the  
81 healthcare system, including associated unplanned 30-day readmissions [5]. The most  
82 common condition-related causes of unplanned readmission following a total knee  
83 arthroplasty (TKA) are surgical-site infection, arthrofibrosis, cellulitis, concomitant co-  
84 morbidities, and fluid and electrolyte imbalance [9]. Other factors such as old age, revision  
85 procedure and acute length of hospital stay also increase the risk of unplanned 30-day  
86 readmissions [9]. Beyond the complications as a cause of the readmission, there are patient  
87 factors related to the hospital stay that increase risk of readmission [10].

88 Krumholz [11] describes post-hospital syndrome as a period of vulnerability after discharge  
89 from the hospital which leaves a patient at increased risk of re-hospitalization from  
90 conditions which are often unrelated to the original reason for of admission. It is proposed  
91 that this acquired transient state might be due to patients' experiences of pain, sleep  
92 deprivation, and poor nutrition during their hospital stay [11]. While this hypothesis is  
93 supported by evidence that increasing patient capacity for self-care is effective at reducing  
94 30-day readmissions [10], as far as we are aware, post-hospital syndrome has not been

1  
2  
3 95 quantified or measured as an independent variable in association with unplanned 30-day  
4  
5 96 readmission.

6  
7  
8 97 Research examining unplanned 30-day readmissions has described a number of associated  
9  
10 98 factors. These factors include: clinical and demographic characteristics [12, 13]; a lack of  
11  
12 99 access to primary care; the continuity and regularity of primary care [14-16]; and deficits in  
13  
14 100 hospital discharge planning, which often focus on knowledge provision rather than patients'  
15  
16 101 capacity to implement this knowledge [10].

17  
18  
19  
20 102 The patient-enablement instrument is a tool used to measure a person's knowledge and  
21  
22 103 understanding of their health condition; confidence to manage their condition, health, and life  
23  
24 104 [17]; and their ability to source appropriate healthcare for their individual needs. While this  
25  
26 105 measure has largely been examined in primary-care settings, its role in preventing unplanned  
27  
28 106 hospital readmissions has not yet been explored.

29  
30  
31  
32 107 The purpose of this study was to investigate factors associated with unplanned 30-day  
33  
34 108 readmissions following a TKA, including aspects of hospital experiences, patient enablement,  
35  
36 109 and transition from hospital to home.

## 40 110 **Methods**

41  
42 111

### 43 112 **Study population**

44  
45  
46 113 Consecutive patients over the age of 16 years, attending a six-week follow-up appointment  
47  
48 114 after undergoing total knee arthroplasty at one of four private and public clinical services  
49  
50 115 between 1 February 2018 and 31 January 2019.

### 51 116 **Patient and public involvement**

52  
53 117

1  
2  
3 118 Five people who had previously had an arthroplasty with a surgeon from one of the  
4  
5 119 participating clinics completed the survey and provided feedback regarding its  
6  
7  
8 120 meaningfulness in relation to their experiences, and the length and readability of the survey.  
9

## 10 121 **Study design**

11  
12 122  
13  
14  
15 123 A cross-sectional survey was conducted in the Australian Capital Territory (ACT) between 1  
16  
17 124 February 2018 and 31 January 2019 at all private and public sites undertaking lower limb  
18  
19 125 joint replacement services. Data was collected retrospectively at the six-week follow-up  
20  
21 126 appointment post-surgery for both total knee and hip replacement (THA). The responses for  
22  
23 127 patients having undergone elective TKA are presented in this paper.  
24  
25  
26

## 27 128 **Instrument**

28  
29 129  
30  
31  
32  
33 130 The *ACT Transition from Hospital to Home Survey* was developed and piloted by researchers  
34  
35 131 at the Australian National University, Canberra Hospital, Academic Unit of General Practice  
36  
37 132 ACT Health, Capital Health Network, Health Care Consumer Association ACT, and people  
38  
39 133 who had previously experienced either TKA or THA [18]. The 50-item survey was designed  
40  
41 134 to measure patients' experiences in hospital and transition to home across six domains: 1.  
42  
43 135 Patient demographic characteristics and co-morbidities; 2. Post-hospital syndrome; 3.  
44  
45 136 Medication enablement; 4. Patient enablement; 5. Transition to general practice; and 6. Pre-  
46  
47 137 and post-hospital information and pre-/post-surgical rehabilitation  
48  
49  
50  
51 138 Co-morbidities: Morbidity was assessed with the validated 18-item Functional Comorbidity  
52  
53 139 Index which is used to predict functional status rather than mortality [19].  
54  
55  
56  
57 140 Post-hospital syndrome: Fifteen items within three domains covering patients' experiences of  
58  
59 141 sleep, pain, and diet in hospital were designed to measure post-hospital syndrome.  
60

1  
2  
3 142 Medication enablement: Three items measured medication enablement in terms of patients'  
4  
5 143 knowledge and ability to manage their medications following discussions with health care  
6  
7 144 providers derived from a previous study in general practice nurse consultations [20]. The  
8  
9 145 internal consistency of this scale was established ( $\alpha = 0.80$ ) in the pilot study (unpublished  
10  
11 146 results).

12  
13  
14  
15 147 Patient enablement: This is the internationally validated six-item Patient Enablement  
16  
17 148 Instrument [21] used primarily in primary-care research.

18  
19  
20 149 Transition to general practice: 10-items assessing patients' relationships with their general  
21  
22 150 practitioner (GP) in terms of continuity of care, regularity of care, healthcare planning,  
23  
24 151 patients' understanding of when to see their GP following discharge, and access to care.  
25  
26 152 These questions were refined as a result of the pilot study to eliminate covariance and  
27  
28 153 repetition.

29  
30  
31  
32 154 Interaction with the recommended rehabilitation program: Referral and attendance to  
33  
34 155 outpatient physiotherapy rehabilitation post-discharge was examined with one item.

### 35 36 37 38 156 **Data collection**

39  
40  
41 157 The paper surveys were distributed by reception staff at patients' six-week post-operative  
42  
43 158 consultation. Staff were given a protocol and suggested wording to use when providing the  
44  
45 159 survey. An information sheet about the study was provided to patients and anonymity  
46  
47 160 guaranteed. Patients were not required to include their name or identifying information on the  
48  
49 161 survey. This ensured that patients understood that participation or non-participation did not  
50  
51 162 affect the care they received and that completed surveys were confidential to clinic staff.  
52  
53 163 completion of the survey implied written consent and this was agreed and approved by the  
54  
55 164 local ethics committee. Surveys were deposited in a sealed box in the waiting room and  
56  
57 165 collected by the researcher at regular intervals.

1  
2  
3 1664  
5  
6 167 **Data analysis**7  
8 168

9  
10  
11 169 Completed survey data was collated and descriptive and inferential statistics used. Variables  
12  
13 170 were described using summary statistics and frequencies. Some variables were grouped to  
14  
15 171 create new variables and others, for example, BMI, were converted to categorical variables  
16  
17 172 for analysis. The primary outcome of interest was self-reported 30-day readmission to  
18  
19 173 hospital following discharge, categorized as a binary variable (yes/no). Age, sex, living  
20  
21 174 situation, country of origin, education, self-rated health, comorbidities, post-hospital  
22  
23 175 syndrome (experiences of sleep, diet and pain), experiences of family practice (access,  
24  
25 176 continuity, planning, regularity), medication enablement, and patient enablement were  
26  
27 177 separate independent variables.

28  
29  
30  
31  
32 178 An exploratory factor analysis (EFA) with orthogonal varimax rotation was undertaken to  
33  
34 179 explore the relationship between variables which described post hospital syndrome. The  
35  
36 180 modes/themes which had an eigenvalue of  $>1$  were retained and the internal consistency of  
37  
38 181 the modes which emerged was examined using Cronbach's alpha. The suitability of the data  
39  
40 182 for an EFA was confirmed with a Kaiser-Meyer-Olkin (KMO) criteria and Bartlett test.  
41  
42  
43  
44 183 Prior to analysis, variable independence was established. Ordinal variables were examined  
45  
46 184 using Spearman's correlation coefficient and categorical variables using the chi squared ( $\chi^2$ )  
47  
48 185 test and odds ratio. If a strong correlation ( $> 0.6$ ) or a significant association ( $p \leq 0.2$ ) existed  
49  
50 186 between two eligible variables, only one of these was retained for inclusion in the final  
51  
52 187 analysis.  
53  
54  
55  
56  
57  
58  
59  
60

1  
2  
3 188 Univariate logistic regression analysis was conducted for each independent variable and the  
4  
5 189 dependent variable (unplanned 30-day readmission). Univariate logistic regression was  
6  
7 190 conducted on each individual comorbidity item, and then for the total comorbidity score.  
8  
9  
10 191 To further eliminate potential confounding, two multiple logistic regression models were run  
11  
12 192 - one including eligible individual variables from within the Functional Comorbidity Index,  
13  
14 193 Medication Enablement questions and the Patient Enablement Instrument; and a second  
15  
16 194 including total scores.  
17  
18  
19 195 The full multiple logistic regression model included eight variables. These were public or  
20  
21 196 private hospital; upper gastrointestinal disease; self-rated health; given an information  
22  
23 197 package or checklist before surgery; usual waiting time to see GP; attendance at  
24  
25 198 recommended rehabilitation or physiotherapy; and living status. The reduced model included  
26  
27 199 'public or private hospital' and 'attendance at recommended rehabilitation or physiotherapy'.  
28  
29 200 Only risk factors with  $p$ -values  $\leq 0.25$  were included in the multiple logistic regression  
30  
31 201 analyses. Logistic regression with backward stepwise selection was used to choose risk  
32  
33 202 factors for the multivariable model. A significance level of 0.25 was required to allow a risk  
34  
35 203 factor into the model, and a significance level of 0.25 was required for a risk factor to stay in  
36  
37 204 the model. The adjusted odds ratio and its 95% confidence interval were calculated for each  
38  
39 205 risk factor in the presence of others in the final model. Both the models were adjusted for age  
40  
41 206 and sex.  
42  
43  
44 207 Likelihood ratio tests and Hosmer Lemeshow goodness of fit test were used to check the fit  
45  
46 208 of the final model. The Receiver Operator Characteristic Curve (ROC) was plotted to check  
47  
48 209 the specificity and sensitivity of the predicted model.  
49  
50  
51 210 Stata/IC 15.1 (StataCorp LLC, Texas, USA) was used to perform all statistical analyses [22].  
52  
53  
54  
55  
56  
57  
58  
59  
60



## 211 **Missing data**

212 The criteria used for acceptability of non-response to all survey questions was 10% or lower  
213 including for medication and patient enablement scale [23-25]. Missing data for individual  
214 variables within the medication and patient enablement scales were imputed to equal the  
215 median value of non-missing data [26-29].

## 216 **Ethical approval**

217  
218 Ethical approval was obtained from the ACT Health (ETHLR.17.207), Calvary Healthcare  
219 Bruce (45-2017) and the Australian National University (2017/798) Human Research Ethics  
220 Committees. All participants provided written informed consent to participate in this study.

## 221 **Results**

222 Of the 1069 people invited to participate, 827 (77%) completed the overall survey.

223 Of all surgeries, 380 received a total knee arthroplasty and of these 13 were readmitted within  
224 30 days. Participant demographics are presented in Table 1. Private patients accounted for  
225 65% of the total population (247 private patients, 133 public patients). This represented 44%  
226 of all private patients and 96% of all public patients who had a TKA during the study period  
227 which represents 54% of all TKAs. 57% of those who underwent knee surgery were females.

228 The mean age was 67.4 with a standard deviation 0.5 years (age range 44.8 to 91.0 years).

229 Mean BMI was 31.5 kg/m<sup>2</sup> with most having a BMI of >30 (58%). Most participants were

230 non-indigenous (99%). There were three people of Aboriginal and/or Torres Strait Islander

231 origin, none of whom was readmitted. There were proportionally more private patients aged

232 65-84 years (63%) compared to public (53%), whereas proportionally more public patients

233 were in the 45-64 age group (44% compared to 35%). The proportion of females within the

1  
2  
3  
4  
5  
6  
7  
8  
9  
10  
11  
12  
13  
14  
15  
16  
17  
18  
19  
20  
21  
22  
23  
24  
25  
26  
27  
28  
29  
30  
31  
32  
33  
34  
35  
36  
37  
38  
39  
40  
41  
42  
43  
44  
45  
46  
47  
48  
49  
50  
51  
52  
53  
54  
55  
56  
57  
58  
59  
60

234 public cohort was greater than private (67% compared to 57%). A higher proportion of

235 public patients lived alone (31% compared to 23%).

236

For peer review only

237 Table 1. Characteristics of TKA participants with an unplanned 30-day readmission (n) as a  
 238 proportion of all participants (N).  
 239

| Variable                 | Public<br>n/N                 | Private<br>n/N | Total<br>N=13/380<br>(%)* |             |
|--------------------------|-------------------------------|----------------|---------------------------|-------------|
| <b>Age</b>               | 45-64                         | 1/55           | 1/79                      | 2/134 (2%)  |
|                          | 65- 84                        | 4/33           | 2/145                     | 10/211(5%)  |
|                          | >85 years                     | 0/4            | 0/5                       | 0/9         |
| <b>Gender</b>            | Male                          | 1/21           | 1/97                      | 3/139 (2%)  |
|                          | Female                        | 7/86           | 3/129                     | 2/55 (5%)   |
|                          | Other                         | 0/0            | 0/2                       | 0/2         |
| <b>Language</b>          | Other than English<br>at home | 0/21           | 1/14                      | 2/49 (4%)   |
|                          | Only speak English            | 1/12           | 1/106                     | 11/320 (3%) |
| <b>Living Status</b>     | Live alone                    | 7/40           | 0/55                      | 2/95 (2%)   |
|                          | Live with someone             | 1/45           | 4/189                     | 11/273 (4%) |
| <b>BMI Calculations</b>  | BMI (Mean)                    | 31.5           |                           |             |
|                          | 18.5-24.4                     | 1/7            | 0/22                      | 1/31 (3%)   |
|                          | 24.5-30                       | 1/34           | 1/43                      | 2/129 (2%)  |
|                          | >30                           | 7/74           | 3/109                     | 10/220 (5%) |
| <b>Indigenous status</b> | Aboriginal                    | 0/1            | 0/0                       | 0/1         |
|                          | Torres Strait<br>Islander     | 0/1            | 0/1                       | 0/2         |
|                          | Both                          |                |                           | 0/0         |

|                  |                                                     |       |      |             |
|------------------|-----------------------------------------------------|-------|------|-------------|
|                  | Neither                                             | 9/104 | 2/99 | 13/315 (4%) |
| <b>Education</b> | No school certificate<br>or other<br>qualifications | 0/9   | 0/11 | 0/22        |
|                  | School or<br>intermediate<br>certificate            | 1/8   | 1/40 | 6/87 (7%)   |
|                  | Year 12 or leaving<br>certificate                   | 1/17  | 1/32 | 1/27 (4%)   |
|                  | Trade/<br>apprenticeship                            | 0/10  | 1/17 | 1/30 (3%)   |
|                  | Certificate/ diploma                                | 2/23  | 0/50 | 1/38 (3%)   |
|                  | University degree or<br>higher                      | 1/17  | 1/68 | 2/95 (2%)   |

\*Missing values for age: 26, Gender: 24, Language: 11, Living status: 6, BMI: 36, Indigenous status: 62, Education: 16.

\*\*Missing value for readmission for age: 1

### 244 **Post-hospital syndrome exploratory factor analysis (EFA)**

245 The results of the exploratory factor analysis are reported in Table 2. Three modes/themes  
246 with acceptable internal consistency emerged. First, diet, which was described by responses  
247 to two questions: “Did you feel your dietary requirements were met in hospital?” and  
248 “Overall, how would you rate the quality of the food in hospital?” The second theme was  
249 pain, which was also explained by two questions: “How would you describe the general level  
250 of pain you experienced?” and “When you left hospital, how would you rate your pain out of  
251 10?” The third was sleep which was explained by “Did you feel well rested when you left the  
252 hospital?” and “How would you rate the quality of sleep in the hospital?”

253 Floor and ceiling effects were observed for patient enablement due to a large number of  
254 participants reporting being either fully enabled or not enabled at all. To address this, the

255 variable was dichotomised around the mean where ‘less enabled’ was  $\leq 6.5$  and ‘more  
 256 enabled’ was  $>6.5$  in line with previous studies using this instrument [28, 30]. Sixty percent  
 257 of participants (n=212/357) reported that they were less enabled to manage their health after  
 258 their stay in the hospital.

259 Table 2. Exploratory Factor Analysis (EFA) and emerging variables.

| Factor                                                            | Eigenvalue  | Difference  | Proportion  | Cumulative |
|-------------------------------------------------------------------|-------------|-------------|-------------|------------|
| Factor 1                                                          | 2.53        | 0.85        | 0.18        | 0.18       |
| Factor 2                                                          | 1.69        | 0.42        | 0.12        | 0.30       |
| Factor 3                                                          | 1.27        | 0.12        | 0.09        | 0.39       |
| Bartlett test of sphericity $p=0.000$                             |             |             |             |            |
| Kaiser-Meyer-Olkin (KMO)= 0.62                                    |             |             |             |            |
| Variable                                                          | Factor 1    | Factor 2    | Factor 3    |            |
| Did you feel your dietary requirements were met in hospital?      | <b>0.88</b> | 0.01        | 0.10        |            |
| Overall, how would you rate the quality of the food in hospital?  | <b>0.86</b> | 0.01        | 0.09        |            |
| How would you describe the general level of pain you experienced? | -0.02       | <b>0.83</b> | 0.10        |            |
| When you left hospital, how would you rate your pain out of 10?   | 0.04        | <b>0.75</b> | 0.09        |            |
| Did you feel well rested when you left the hospital?              | 0.20        | 0.18        | <b>0.75</b> |            |
| How would you rate the quality of sleep in the hospital? (Poor)   | 0.30        | 0.18        | <b>0.67</b> |            |

## 263 **Multiple logistic regression analysis**

264 The results of univariate analysis are presented in Supplementary table 1. The Area Under the  
265 Curve (AUC) was 0.80 (95% CI: 0.66, 0.94) indicating high overall accuracy of the logistic  
266 model (80%) (Figure 1). The area under the ROC curve is interpreted as the probability that a  
267 subject with unplanned 30-day readmission is given a higher probability of the outcome by  
268 the logistic model than a randomly chosen subject without unplanned 30-day readmission. An  
269 AUC value of 0.50 indicates that the model has no discriminatory ability (the diagonal line  
270 corresponds to random change). The Pearson chi-sq GOF test statistic is 11.64 and since  $p =$   
271 0.7682, we conclude that there is no evidence against the model fitting the data well.

272 Eight variables were eligible for inclusion in the multiple logistic regression analysis. Due to  
273 the wide confidence interval for stroke, this variable was eliminated from the full model. Of  
274 these, 'public /private status' and 'rehabilitation attendance' were retained for the reduced  
275 model as they were the only variables to retain significance after stepwise removal of the  
276 other variables in the full model. The results of the multiple regression analysis are reported  
277 in Table 3.

278 The final multiple regression model included a sample size of 328 observations and the  
279 following factors remained significant. After controlling for age and sex, public patients were  
280 significantly more likely to be readmitted within 30 days compared to private patients  
281 (OR=6.31, 95% CI:1.59-25.14,  $p=0.009$ ), and patients attended rehabilitation were  
282 significantly less likely to be readmitted within 30 days of discharge than those who did not  
283 (OR=0.16, 95% CI: 0.04-0.57,  $p=0.005$ ) After attempting to adjust for age and sex in a four-  
284 covariate reduced model, public patients (9/134, 6.7%) were significantly more likely  
285 (adjusted OR=6.31, 95% CI:1.59-25.14,  $p=0.009$ ) to be readmitted within 30 days compared  
286 to private patients (4/246, 1.6%) and patients attended rehabilitation (7/301, 2.3%) were

287 significantly less likely (adjusted OR=0.16, 95% CI: 0.04-0.57, p=0.005) to be readmitted  
 288 within 30 days of discharge than those who did not (6/39,15.3 %).

289

290 Table 3. Results of multiple logistic regression analysis examining the association between  
 291 patient, hospital and transition to general practice factors associated with unplanned 30-day  
 292 readmission to hospital.

| <i>Relevant Variables</i>           | <i>Full model*</i> |               |                | <i>Reduced model** (n=328)</i> |               |                |
|-------------------------------------|--------------------|---------------|----------------|--------------------------------|---------------|----------------|
|                                     | <i>OR</i>          | <i>95% CI</i> | <i>p-Value</i> | <i>OR</i>                      | <i>95% CI</i> | <i>p-Value</i> |
| <i>Public or Private</i>            | 3.44               | 0.70-16.89    | 0.12           | 6.31                           | 1.59-25.14    | 0.009          |
| <i>Co-morbidity</i>                 |                    |               |                |                                |               |                |
| Upper gastrointestinal disease      | 0.43               | 0.06-2.96     | 0.39           | -                              | -             | -              |
| <i>Living status</i>                | 0.27               | 0.03-2.45     | 0.25           | -                              | -             | -              |
| <i>Self-Rated Health</i>            | 0.39               | 0.14-1.13     | 0.08           | -                              | -             | -              |
| <i>Information Package</i>          | 0.56               | 0.05-4.04     | 0.65           | -                              | -             | -              |
| <i>Attended info session</i>        | 0.80               | 0.16-7.071    | 0.79           | -                              | -             | -              |
| <i>Waiting time to see GP</i>       | 0.60               | 0.23-1.58     | 0.30           | -                              | -             | -              |
| <i>Attendance to rehabilitation</i> | 0.21               | 0.05-0.96     | 0.04           | 0.16                           | 0.04-0.57     | 0.005          |

293 *Note.* \*Full model included public or private hospital; upper gastrointestinal disease; Self-rated health; given an  
 294 information package or checklist before surgery; usual waiting time to see GP; attendance to recommended  
 295 rehabilitation or physiotherapy; and living status. \*\*Reduced model included variables public or private hospital  
 296 and attendance to recommended rehabilitation or physiotherapy. Both the models were run when adjusting for  
 297 age and sex.

298

## 299 Discussion

300 The aim of this study was to investigate factors associated with unplanned 30-day  
 301 readmission in TKA patients. Of the 4% of patients who had an unplanned readmission, those  
 17

1  
2  
3 302 who attended public hospitals and those who did not attend an outpatient rehabilitation

4  
5 303 program were more likely to be readmitted to hospital within 30 days of discharge.

6  
7  
8 304 While the United States also has a similar 4% readmission rate following TKA [9, 31-33],

9  
10 305 this is higher than that reported by the Australian Institute of Health and Welfare (AIHW) [3].

11  
12 306 However, our results may reflect the true readmission rate more accurately as the AIHW only

13  
14 307 reports public hospital data and the majority of TKAs in Australia are performed in the

15  
16 308 private sector.

17  
18  
19  
20 309 In our study, public patients were more likely to be readmitted within 30 days as compared to

21  
22 310 private patients. The majority of respondents (65%) had their TKA in the private sector,

23  
24 311 consistent with the higher proportion (80%) of TKA procedures performed in the private

25  
26 312 sector in the ACT [34]. Our study has almost complete ascertainment from the public sector,

27  
28 313 and reasonable ascertainment from the private sector, supporting the robustness of our

29  
30 314 findings. The increased likelihood of readmission for public patients might be explained by

31  
32 315 several contributing factors such as socioeconomic status, longer waiting times resulting in

33  
34 316 increased impairment and disease complexity [35-40]. The median waiting time for a TKA in

35  
36 317 2018-19 in the ACT public hospital system was 209 days with 8.2% of patients waiting more

37  
38 318 than 365 days [35]. On the other hand, the median waiting time for Australian private patients

39  
40 319 was just 67 days during the same period [2, 41]. Therefore, waiting time may be an important

41  
42 320 mediating factor however association between the two may only be inferred and no causation

43  
44 321 can be implied.

45  
46  
47  
48 322 Patients who have had to wait longer constitute 1.2% of all unplanned 30-day readmissions

49  
50 323 for elective surgical procedures in Australia [42]. TKA patients who waited longer than six

51  
52 324 months have been described as having significantly worse function and quality of life scores,

53  
54 325 as well as dissatisfaction rates which were mainly influenced by pre-operative anxiety and



1  
2  
3 326 depression [43]. It is important to understand that surgical waiting times are only part of the  
4  
5 327 waiting journey for patients in the public system. The mean waiting times recorded for  
6  
7 328 Australian patients do not take into account the lengthy process of referral, specialist  
8  
9 329 assessment and investigation [44]. Addressing long waiting lists by utilising non-surgical  
10  
11 330 exercise and education programs are increasingly being implemented and the evidence for  
12  
13 331 efficacy is strong [45, 46].  
14  
15  
16

17  
18 332 In our study, patients who attended rehabilitation were less likely to be readmitted within 30  
19  
20 333 days than those who did not. Previous research indicates that private patients are more likely  
21  
22 334 to attend rehabilitation than public patients [47] and that rehabilitation is associated with  
23  
24 335 better physical function after TKA [45]. However, we found no significant relationship  
25  
26 336 between being a public or private patient and attendance at rehabilitation. Both groups in our  
27  
28 337 sample had similar rehabilitation opportunities, except for the provision of hydrotherapy after  
29  
30 338 six weeks indicating that private/public status was not a mediating factor for this finding.  
31  
32  
33

34  
35 339 This study showed no significant associations between general practice (GP) factors and  
36  
37 340 unplanned 30-day readmissions. A recent study reported that timely and regular GP contact  
38  
39 341 during the two years following transition from hospital to community care lowered the risk of  
40  
41 342 emergency readmission to hospital in patients with cardiovascular disease [48]. However, our  
42  
43 343 results might reflect the nature of the health condition. This cohort included people having  
44  
45 344 TKA as a treatment for severe pain for arthritis of the knee, which is quite different to other  
46  
47 345 diseases in that the treatment is potentially definitive and is followed up by the surgeon.  
48  
49  
50

51 346 Although more than half of the patients who were readmitted had high scores for post-  
52  
53 347 hospital syndrome, there was no significant association with 30-day readmission. The  
54  
55 348 hypothesis of post-hospital syndrome describes a transient state resulting in consequences,  
56  
57 349 including a higher risk of readmission [11]. Brownlee et al. [49] found that post-hospital  
58  
59  
60

1  
2  
3 350 syndrome was an independent predictor of readmission within 30 days of discharge in a large  
4  
5 351 cohort of surgical patients. While other studies have attempted to determine the impact of  
6  
7 352 post-hospital syndrome through linked hospital records data, [49, 50] this study is the first to  
8  
9  
10 353 use patient-reported responses to quantify the effect of hospital experience (of pain, sleep,  
11  
12 354 and nutrition) on unplanned 30-day readmissions.

13  
14  
15 355 There are limitations to this study. The main limitation was that there were fewer  
16  
17 356 readmissions than anticipated and the study may have been insufficiently powered for  
18  
19 357 detecting the associations being tested. The results were based on anonymous self-reports;  
20  
21 358 hence there was no capacity to link them to hospital data to establish actual readmission time  
22  
23 359 frames, length of hospital stay, reasons for readmission or previous admission history.  
24  
25 360 However, our primary endpoint was 30-day readmission and we believe that the self-reported  
26  
27 361 data was accurate. The response rate is only an estimation based on joint replacement activity  
28  
29 362 in the ACT. It assumes that all patients returning for their six-week follow-up appointment  
30  
31 363 were invited to participate. We do not know whether the reception staff invited all patients, or  
32  
33 364 only some. The lack of information about non-responders is another limitation of this study.  
34  
35  
36 365 More non-responders may have been readmitted and it is possible that they may have been  
37  
38 366 sicker than responders, which would also influence the readmission rate. Also, as the ACT  
39  
40 367 has a relatively high socioeconomic demographic the findings from this study may not apply  
41  
42 368 to other less affluent areas.

43  
44  
45 369 Our data do not allow us to understand why rehabilitation was not accessed. It is possible that  
46  
47 370 patients who were frailer did not feel able to participate and perhaps they were the patients  
48  
49 371 who were readmitted. However, a range of patient and provider-based factors have been  
50  
51 372 recognized as affecting the rehabilitation pathway chosen by patients, such as pre-operative  
52  
53 373 preferences, previous experiences, perceived benefits, clinical status post-surgery, as well as  
54  
55 374 insurance provider and hospital business model [51]. This association needs clarification.

1  
2  
3 375 It is not known if the rate of readmission can be reduced given the significant comorbidities  
4  
5 376 of the TKA patient sample.  
6  
7

8 377  
9

10  
11 378 **Conclusion**  
12

13 379  
14

15  
16 380 This study was undertaken to explore the factors impacting unplanned 30-day readmission  
17  
18 381 after TKA. These results have implications for policy and for practice. An over-  
19  
20 382 representation of public patients in the readmitted cohort is important. It is possible that the  
21  
22 383 consequences of extended periods of delay to surgery among patients on the public waiting  
23  
24 384 list may be an important factor. Therefore, it is essential to shorten waiting times and  
25  
26 385 prioritize medical need when dealing with public patients. Clinicians should also place  
27  
28 386 emphasis on the importance of attending rehabilitation after a TKA as an effective way to  
29  
30 387 reduce 30-day readmission. Further investigation of how the pre-surgical patient journey can  
31  
32 388 be better optimised to reduce readmission rates is warranted.  
33  
34  
35  
36  
37

38 389  
39  
40  
41  
42  
43  
44  
45  
46  
47  
48  
49  
50  
51  
52  
53  
54  
55  
56  
57  
58  
59  
60

1  
2  
3 **390 Acknowledgement**  
4

5  
6 **391** We wish to thank Orthopaedics ACT and Dr Michael Gross from Canberra Hip and Knee  
7  
8 **392** Replacement for their support with this project. A huge thanks to Dr. Alice Richardson for  
9  
10 **393** their support with the statistics in this project.  
11  
12

13 **394**  
14  
15 **395 Competing interests**  
16

17  
18  
19 **396** None declared.  
20  
21

22 **397**  
23  
24 **398 Funding**  
25

26  
27  
28 **399** This research received no specific grant from any funding agency in the public, commercial  
29  
30 **400** or not-for-profit sectors.  
31  
32

33 **401**  
34  
35 **402 Data sharing statement**  
36

37  
38  
39 **403** Survey data and statistical analysis plans are available from Dr Desborough (ORCID ID:  
40  
41 **404** 0000-0003-1406-4593) upon reasonable request.  
42  
43

44 **405**  
45  
46  
47 **406 Figures**  
48

49  
50 **407** Figure 1. Receiver Operator Curve  
51  
52  
53  
54  
55  
56  
57  
58  
59  
60

1  
2  
3 **408 References**  
4

- 5 **409** [1]. Bureau of Health Information. Spotlight on Measurement: Return to acute care  
6 following hospitalisation, Spotlight on Readmissions Sydney (NSW); BHI; 2015.,.  
7 **410**  
8  
9  
10 **411** [2]. Dixit SK, Sambasivan M. A review of the Australian healthcare system: A policy  
11 perspective. SAGE Open Medicine. 2018;6:2050312118769211 DOI:  
12 **412**  
13 10.1177/2050312118769211.  
14 **413**  
15  
16 **414** [3]. Australian Institute of Health and Welfare 2019. Admitted patient care 2017–18:  
17 Australian hospital statistics. Health services series no. 90. Cat. no. HSE 225. Canberra:  
18 AIHW.  
19 **415**  
20  
21 **416**  
22  
23 **417** [4]. McIlvennan CK, Eapen ZJ, Allen LA. Hospital readmissions reduction program.  
24 Circulation. 2015;131(20):1796-803 DOI: 10.1161/CIRCULATIONAHA.114.010270.  
25 **418**  
26  
27 **419** [5]. Ackerman IN, Bohensky MA, Zomer E, Tacey M, Gorelik A, Brand CA, et al. The  
28 projected burden of primary total knee and hip replacement for osteoarthritis in Australia to  
29 the year 2030. BMC musculoskeletal disorders. 2019;20(1):90- DOI: 10.1186/s12891-019-  
30 **420**  
31 2411-9.  
32 **421**  
33  
34 **422**  
35  
36 **423** [6]. Benbassat J, Taragin M. Hospital Readmissions as a Measure of Quality of Health  
37 Care: Advantages and Limitations. Archives of Internal Medicine. 2000;160(8):1074-81  
38 **424**  
39 DOI: 10.1001/archinte.160.8.1074.  
40 **425**  
41  
42 **426** [7]. Losina E, Thornhill TS, Rome BN, Wright J, Katz JN. The dramatic increase in total  
43 knee replacement utilization rates in the United States cannot be fully explained by growth in  
44 **427**  
45 population size and the obesity epidemic. J Bone Joint Surg Am. 2012;94(3):201-7 DOI:  
46 **428**  
47 10.2106/jbjs.J.01958.  
48 **429**  
49  
50 **430** [8]. Private Healthcare Australia. Pre-Budget submission 2017–18. 19 Jan 2017.  
51 **431**  
52 [https://static.treasury.gov.au/uploads/sites/1/2017/06/C2016-052\\_Private-Healthcare-](https://static.treasury.gov.au/uploads/sites/1/2017/06/C2016-052_Private-Healthcare-Australia.pdf)  
53 **432**  
54 [Australia.pdf](https://static.treasury.gov.au/uploads/sites/1/2017/06/C2016-052_Private-Healthcare-Australia.pdf) (viewed 4 June 2020).  
55  
56  
57  
58  
59  
60

- 1  
2  
3 433 [9]. Schairer WW, Vail TP, Bozic KJ. What are the rates and causes of hospital  
4  
5 434 readmission after total knee arthroplasty? *Clinical orthopaedics and related research*.  
6  
7 435 2014;472(1):181-7 DOI: 10.1007/s11999-013-3030-7.  
8  
9  
10 436 [10]. Leppin AL, Gionfriddo MR, Kessler M, Brito JP, Mair FS, Gallacher K, et al.  
11  
12 437 Preventing 30-day hospital readmissions: a systematic review and meta-analysis of  
13  
14 438 randomized trials. *JAMA internal medicine*. 2014;174(7):1095-107 DOI:  
15  
16 439 10.1001/jamainternmed.2014.1608.  
17  
18  
19 440 [11]. Krumholz HM. Post-hospital syndrome--an acquired, transient condition of  
20  
21 441 generalized risk. *The New England journal of medicine*. 2013;368(2):100-2 DOI:  
22  
23 442 10.1056/NEJMp1212324.  
24  
25  
26 443 [12]. Falster MO, Jorm LR, Douglas KA, Blyth FM, Elliott RF, Leyland AH.  
27  
28 444 Sociodemographic and health characteristics, rather than primary care supply, are major  
29  
30 445 drivers of geographic variation in preventable hospitalizations in Australia. *Med Care*.  
31  
32 446 2015;53(5):436-45 DOI: 10.1097/mlr.0000000000000342.  
33  
34  
35 447 [13]. Kossovsky MP, Sarasin FP, Perneger TV, Chopard P, Sigaud P, Gaspoz J. Unplanned  
36  
37 448 readmissions of patients with congestive heart failure: do they reflect in-hospital quality of  
38  
39 449 care or patient characteristics? *Am J Med*. 2000;109(5):386-90 DOI: 10.1016/s0002-  
40  
41 450 9343(00)00489-7.  
42  
43  
44 451 [14]. Einarsdóttir K, Preen DB, Emery JD, Kelman C, Holman CD. Regular primary care  
45  
46 452 lowers hospitalisation risk and mortality in seniors with chronic respiratory diseases. *J Gen*  
47  
48 453 *Intern Med*. 2010;25(8):766-73 DOI: 10.1007/s11606-010-1361-6.  
49  
50  
51 454 [15]. Cree M, Bell NR, Johnson D, Carriere KC. Increased continuity of care associated  
52  
53 455 with decreased hospital care and emergency department visits for patients with asthma. *Dis*  
54  
55 456 *Manag*. 2006;9(1):63-71 DOI: 10.1089/dis.2006.9.63.  
56  
57  
58  
59  
60

- 1  
2  
3 457 [16]. Tsai CL, Griswold SK, Clark S, Camargo CA, Jr. Factors associated with frequency  
4  
5 458 of emergency department visits for chronic obstructive pulmonary disease exacerbation. *J*  
6  
7 459 *Gen Intern Med.* 2007;22(6):799-804 DOI: 10.1007/s11606-007-0191-7.
- 10 460 [17]. Howie JG, Heaney DJ, Maxwell M, Walker JJ. A comparison of a Patient Enablement  
11  
12 461 Instrument (PEI) against two established satisfaction scales as an outcome measure of  
13  
14 462 primary care consultations. *Fam Pract.* 1998;15(2):165-71 DOI: 10.1093/fampra/15.2.165.
- 17 463 [18]. J. Desborough, S. Doi, and N. Glasgow, K. Douglas, C. Phillips, D. Cox, V.  
18  
19 464 Alexandric, A. Sedrakayn, Examining the interface between acute and primary care:  
20  
21 465 understanding unplanned 30-day readmissions, in Canberra Health Area Research Meeting.  
22  
23 466 2017: Canberra, Australia.
- 26 467 [19] Groll DL, To T, Bombardier C, Wright JG. The development of a comorbidity index  
27  
28 468 with physical function as the outcome. *Journal of Clinical Epidemiology.* 2005;58(6):595-602  
29  
30 469 DOI: <https://doi.org/10.1016/j.jclinepi.2004.10.018>.
- 33 470 [20]. Desborough J, Banfield M, Phillips C, Mills J. The process of patient enablement in  
34  
35 471 general practice nurse consultations: a grounded theory study. *Journal of Advanced Nursing.*  
36  
37 472 2017;73(5):1085-96 DOI: 10.1111/jan.13199.
- 40 473 [21]. Hudon C, Fortin M, Rossignol F, Bernier S, Poitras M-E. The Patient Enablement  
41  
42 474 Instrument-French version in a family practice setting: a reliability study. *BMC family*  
43  
44 475 *practice.* 2011;12:71- DOI: 10.1186/1471-2296-12-71.
- 46 476 [22]. StataCorp. 2019. *Stata Statistical Software: Release 16.* College Station, TX:  
47  
48 477 StataCorp LLC.
- 51 478 [23]. Foss AJE, Lamping DL, Schroter S, Hungerford J. Development and validation of a  
52  
53 479 patient based measure of outcome in ocular melanoma. *British Journal of Ophthalmology.*  
54  
55 480 2000;84(4):347 DOI: 10.1136/bjo.84.4.347.

- 1  
2  
3 481 [24]. Desborough J, Bagheri N, Banfield M, Mills J, Phillips C, Korda R. The impact of  
4  
5 482 general practice nursing care on patient satisfaction and enablement in Australia: A mixed  
6  
7 483 methods study. *International Journal of Nursing Studies*. 2016;64:108-19 DOI:  
8  
9  
10 484 <https://doi.org/10.1016/j.ijnurstu.2016.10.004>.  
11  
12 485 [25]. Bowling A. *Research methods in health: investigating health and health services*:  
13  
14 486 McGraw-hill education (UK); 2014.  
15  
16 487 [26]. Mercer SW, Jani BD, Maxwell M, Wong SYS, Watt GCM. Patient enablement  
17  
18 488 requires physician empathy: a cross-sectional study of general practice consultations in areas  
19  
20 489 of high and low socioeconomic deprivation in Scotland. *BMC family practice*. 2012;13:6-  
21  
22 490 DOI: 10.1186/1471-2296-13-6.  
23  
24 491 [27]. Desborough J, Bagheri N, Banfield M, Mills J, Phillips C, Korda R. The impact of  
25  
26 492 general practice nursing care on patient satisfaction and enablement in Australia: A mixed  
27  
28 493 methods study. *International journal of nursing studies*. 2016;64:108-19 DOI:  
29  
30 494 10.1016/j.ijnurstu.2016.10.004.  
31  
32 495 [28]. Mercer SW, Jani BD, Maxwell M, Wong SY, Watt GC. Patient enablement requires  
33  
34 496 physician empathy: a cross-sectional study of general practice consultations in areas of high  
35  
36 497 and low socioeconomic deprivation in Scotland. *BMC Family Practice*. 2012;13(1):6 DOI:  
37  
38 498 10.1186/1471-2296-13-6.  
39  
40 499 [29]. Mercer SW, Neumann M, Wirtz M, Fitzpatrick B, Vojt G. General practitioner  
41  
42 500 empathy, patient enablement, and patient-reported outcomes in primary care in an area of  
43  
44 501 high socio-economic deprivation in Scotland--a pilot prospective study using structural  
45  
46 502 equation modeling. *Patient Educ Couns*. 2008;73(2):240-5 DOI: 10.1016/j.pec.2008.07.022.  
47  
48 503 [30]. Desborough J, Banfield M, Parker R. A tool to evaluate patients' experiences of  
49  
50 504 nursing care in Australian general practice: development of the Patient Enablement and  
51  
52 505 Satisfaction Survey. *Aust J Prim Health*. 2014;20(2):209-15 DOI: 10.1071/py12121.  
53  
54  
55  
56  
57  
58  
59  
60



- 1  
2  
3 506 [31]. Australian Commission on Safety and Quality in Health Care. Avoidable Hospital  
4  
5 507 Readmissions: Report on Australian and International indicators, their use and the efficacy of  
6  
7 508 interventions to reduce readmissions. Sydney: ACSQHC; 2019.
- 9  
10 509 [32]. Cram P, Lu X, Kates SL, Singh JA, Li Y, Wolf BR. Total knee arthroplasty volume,  
11  
12 510 utilization, and outcomes among Medicare beneficiaries, 1991-2010. JAMA.  
13  
14 511 2012;308(12):1227-36 DOI: 10.1001/2012.jama.11153.
- 16  
17 512 [33]. Brown NM, Sheth NP, Davis K, Berend ME, Lombardi AV, Berend KR, et al. Total  
18  
19 513 Knee Arthroplasty Has Higher Postoperative Morbidity Than Unicompartmental Knee  
20  
21 514 Arthroplasty: A Multicenter Analysis. The Journal of Arthroplasty. 2012;27(8,  
22  
23 515 Supplement):86-90 DOI: <https://doi.org/10.1016/j.arth.2012.03.022>.
- 25  
26 516 [34]. Pawlikowska TRB, Nowak PR, Szumilo-Grzesik W, Walker JJ. Primary care reform:  
27  
28 517 a pilot study to test the evaluative potential of the Patient Enablement Instrument in Poland.  
29  
30 518 Family Practice. 2002;19(2):197-201 DOI: 10.1093/fampra/19.2.197.
- 32  
33 519 [35]. Australian Institute of Health and Welfare, 2018, My Hospitals website available at:  
34  
35 520 [https://www.myhospitals.gov.au/hospital/810000082/the-canberra-hospital/waiting-times-](https://www.myhospitals.gov.au/hospital/810000082/the-canberra-hospital/waiting-times-elective-surgery-intended-procedure)  
36  
37 521 [elective-surgery-intended-procedure](https://www.myhospitals.gov.au/hospital/810000082/the-canberra-hospital/waiting-times-elective-surgery-intended-procedure).
- 39  
40 522 [36]. Brennan SL, Lane SE, Lorimer M, Buchbinder R, Wluka AE, Page RS, et al.  
41  
42 523 Associations between socioeconomic status and primary total knee joint replacements  
43  
44 524 performed for osteoarthritis across Australia 2003–10: data from the Australian Orthopaedic  
45  
46 525 Association National Joint Replacement Registry. BMC Musculoskeletal Disorders.  
47  
48 526 2014;15(1):356 DOI: 10.1186/1471-2474-15-356.
- 49  
50 527 [37]. Desmeules F, Dionne CE, Belzile É L, Bourbonnais R, Frémont P. The impacts of  
51  
52 528 pre-surgery wait for total knee replacement on pain, function and health-related quality of life  
53  
54 529 six months after surgery. J Eval Clin Pract. 2012;18(1):111-20 DOI: 10.1111/j.1365-  
55  
56 530 2753.2010.01541.x.

- 1  
2  
3 531 [38]. Desmeules F, Dionne CE, Belzile E, Bourbonnais R, Frémont P. The burden of wait  
4  
5 532 for knee replacement surgery: effects on pain, function and health-related quality of life at the  
6  
7 533 time of surgery. *Rheumatology (Oxford)*. 2010;49(5):945-54 DOI:  
8  
9 534 10.1093/rheumatology/kep469.  
10  
11  
12 535 [39]. Keeney BJ, Koenig KM, Paddock NG, Moschetti WE, Sparks MB, Jevsevar DS. Do  
13  
14 536 Aggregate Socioeconomic Status Factors Predict Outcomes for Total Knee Arthroplasty in a  
15  
16 537 Rural Population? *The Journal of Arthroplasty*. 2017;32(12):3583-90 DOI:  
17  
18 538 10.1016/j.arth.2017.07.002.  
19  
20  
21 539 [40]. McCormack R, Michels R, Ramos N, Hutzler L, Slover JD, Bosco JA. Thirty-day  
22  
23 540 readmission rates as a measure of quality: causes of readmission after orthopedic surgeries  
24  
25 541 and accuracy of administrative data. *J Healthc Manag*. 2013;58(1):64-76; discussion -7.  
26  
27 542 [41]. Australian Institute of Health and Welfare 2017. Admitted patient care 2015–16:  
28  
29 543 Australian hospital statistics. Health services series no.75. Cat. no. HSE 185. Canberra:  
30  
31 544 AIHW.  
32  
33  
34 545 [42]. Australian Institute of Health and Welfare 2018. Elective surgery waiting times 2017–  
35  
36 546 18: Australian hospital statistics. Health services series no. 88. Cat. no. HSE 215. Canberra:  
37  
38 547 AIHW.  
39  
40  
41 548 [43]. Lizaur-Utrilla A, Martinez-Mendez D, Miralles-Muñoz FA, Marco-Gomez L, Lopez-  
42  
43 549 Prats FA. Negative impact of waiting time for primary total knee arthroplasty on satisfaction  
44  
45 550 and patient-reported outcome. *International Orthopaedics*. 2016;40(11):2303-7 DOI:  
46  
47 551 10.1007/s00264-016-3209-0.  
48  
49  
50 552 [44]. Curtis AJ, Russell COH, Stoelwinder JU, McNeil JJ. Waiting lists and elective  
51  
52 553 surgery: ordering the queue. *Medical Journal of Australia*. 2010;192(4):217-20 DOI:  
53  
54 554 10.5694/j.1326-5377.2010.tb03482.x.  
55  
56  
57  
58  
59  
60

- 1  
2  
3 555 [45]. Skou ST, Roos EM. Good Life with osteoArthritis in Denmark (GLA:D™): evidence-  
4  
5 556 based education and supervised neuromuscular exercise delivered by certified  
6  
7 557 physiotherapists nationwide. *BMC Musculoskelet Disord*. 2017;18(1):72 DOI:  
8  
9 558 10.1186/s12891-017-1439-y.
- 10  
11  
12 559 [46]. Skou ST, Roos EM, Laursen MB, Rathleff MS, Arendt-Nielsen L, Simonsen O, et al.  
13  
14 560 A Randomized, Controlled Trial of Total Knee Replacement. *New England Journal of*  
15  
16 561 *Medicine*. 2015;373(17):1597-606 DOI: 10.1056/NEJMoa1505467.
- 17  
18  
19 562 [47]. Faux Steven; Shiner CW, Jane; Chia, Karen. Evaluating the role of rehabilitation for  
20  
21 563 lower limb joint replacement, deconditioning and cancer. Sydney: Department of  
22  
23 564 Rehabilitation Medicine, St Vincent's Hospital Sydney, Australia, (APHA) APHA.
- 24  
25  
26 565 [48]. Australian Institute of Health and Welfare 2018. Transition between hospital and  
27  
28 566 community care for patients with coronary heart disease: New South Wales and Victoria,  
29  
30 567 2012–2015. Cat. no. CDK 9. Canberra: AIHW.
- 31  
32  
33 568 [49]. Brownlee SA, Blackwell RH, Blanco BA, Zapf MAC, Kliethermes S, Gupta GN, et  
34  
35 569 al. Impact of Post-Hospital Syndrome on Outcomes Following Elective, Ambulatory Surgery.  
36  
37 570 *Annals of surgery*. 2017;266(2):274-9 DOI: 10.1097/SLA.0000000000001965.
- 38  
39  
40 571 [50]. Sadatsafavi M, Lynd LD, Fitzgerald JM. Post-hospital syndrome in adults with  
41  
42 572 asthma: a case-crossover study. *Allergy, asthma, and clinical immunology : official journal of*  
43  
44 573 *the Canadian Society of Allergy and Clinical Immunology*. 2013;9(1):49- DOI:  
45  
46 574 10.1186/1710-1492-9-49.
- 47  
48  
49  
50 575 [51]. Buhagiar MA, Naylor JM, Simpson G, Harris IA, Kohler F. Understanding consumer  
51  
52 576 and clinician preferences and decision making for rehabilitation following arthroplasty in the  
53  
54 577 private sector. *BMC Health Services Research*. 2017;17(1):415 DOI: 10.1186/s12913-017-  
55  
56 578 2379-9.

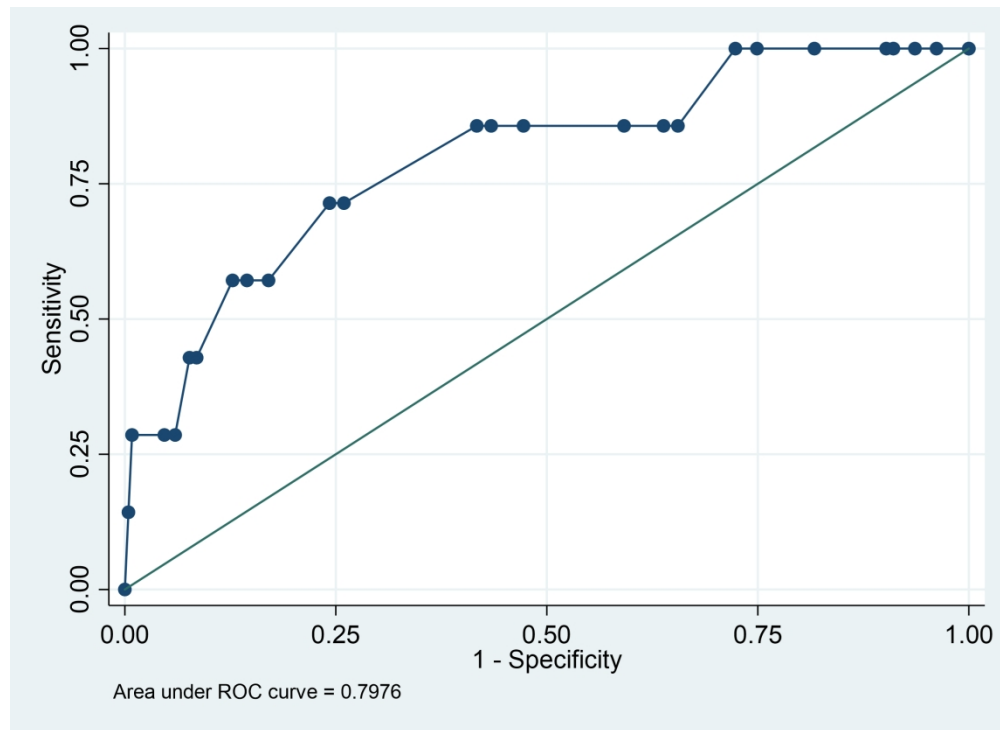

Figure 1 Receiver Operator Curve. The area under the ROC curve is 0.80 (95% CI: 0.66, 0.94). The area under the ROC curve is interpreted as the probability that a subject with unplanned 30-day readmission is given a higher probability of the outcome by the logistic model than a randomly chosen subject without unplanned 30-day readmission. An AUC value of 0.50 indicates that the model has no discriminatory ability (the diagonal line corresponds to random change).

272x198mm (236 x 236 DPI)

Supplementary table 1. Results of univariate logistic regression analyses of variables associated with unplanned 30-day readmission in patients who received total knee arthroplasty

| <i>Variables</i>                            | <i>Odds Ratio</i> |               |                |                            |     |         |      |
|---------------------------------------------|-------------------|---------------|----------------|----------------------------|-----|---------|------|
|                                             | <i>OR</i>         | <i>95% CI</i> | <i>p-value</i> |                            |     |         |      |
| Public vs Private                           | 4.2               | 1.2-14.2      | 0.02           |                            |     |         |      |
| <b>Comorbidities</b>                        |                   |               |                | Upper GI disease           | 0.6 | 0.2-2.4 | 0.52 |
| Arthritis <sup>#</sup>                      | 1.8               | 0.2-14.6      | 0.56           | Depression                 | 0.6 | 0.1-2.9 | 0.55 |
| Osteoporosis                                | 1.7               | 0.4-6.7       | 0.43           | Anxiety or panic disorders | 1.6 | 0.4-6.3 | 0.46 |
| Asthma                                      | 0.8               | 0.2-3.8       | 0.80           | Visual impairment          | 1.0 | 0.3-3.7 | 0.98 |
| COPD, ARDS, emphysema                       | 1.8               | 0.2-14.9      | 0.58           | Hearing impairment         | 1.3 | 0.3-6.0 | 0.80 |
| Angina                                      | -                 | -             | -              | Degenerative disc disease  | 1.6 | 0.5-5.4 | 0.44 |
| Congestive heart failure (or heart disease) | 1.9               | 0.2-16.2      | 0.53           | <b>Morbidity scale</b>     |     |         |      |
| Heart attack                                | -                 | -             | -              | 0                          | -   | -       | -    |
| Neurological disease                        | -                 | -             | -              | 1                          | 0.6 | 0.1-2.5 | 0.50 |
| Stroke or TIA                               | 3.6               | 0.7-18.2      | 0.11           | 2                          | 0.4 | 0.1-2.0 | 0.27 |
| Peripheral vascular disease                 | -                 | -             | -              | 3 or more                  | -   | -       | -    |
| Diabetes type I and II                      | 2.3               | 0.6-9.1       | 0.21           | <b>Self-Rated Health</b>   |     |         |      |
|                                             |                   |               |                | Poor                       | -   | -       | -    |
|                                             |                   |               |                | Fair                       | 0.3 | 0.0-3.0 | 0.3  |
|                                             |                   |               |                | Good                       | 0.2 | 0.0-2.0 | 0.1  |
|                                             |                   |               |                | Very good                  | 0.1 | 0.0-1.0 | 0.1  |

1  
2  
3  
4  
5  
6  
7  
8  
9  
10  
11  
12  
13  
14  
15  
16  
17  
18  
19  
20  
21  
22  
23  
24  
25  
26  
27  
28  
29  
30  
31  
32  
33  
34  
35  
36  
37  
38  
39  
40  
41  
42  
43  
44  
45  
46

|                  |   |   |   |
|------------------|---|---|---|
| <i>Excellent</i> | - | - | - |
|------------------|---|---|---|

---

**Before you went to hospital**

|                                      |     |         |      |
|--------------------------------------|-----|---------|------|
| Invited to attend session by surgeon | 0.5 | 0.1-1.5 | 0.21 |
|--------------------------------------|-----|---------|------|

|                              |     |         |      |
|------------------------------|-----|---------|------|
| Attended information session | 1.0 | 0.3-3.2 | 0.99 |
|------------------------------|-----|---------|------|

|                                               |     |         |      |
|-----------------------------------------------|-----|---------|------|
| Usefulness of pre-surgery information session | 0.7 | 0.3-1.9 | 0.53 |
|-----------------------------------------------|-----|---------|------|

|                        |   |   |   |
|------------------------|---|---|---|
| <i>Not very useful</i> | - | - | - |
|------------------------|---|---|---|

|                          |     |         |      |
|--------------------------|-----|---------|------|
| <i>Moderately useful</i> | 0.1 | 0.0-1.8 | 0.13 |
|--------------------------|-----|---------|------|

|                    |     |         |      |
|--------------------|-----|---------|------|
| <i>Very useful</i> | 0.3 | 0.0-1.8 | 0.21 |
|--------------------|-----|---------|------|

|                                        |   |   |   |
|----------------------------------------|---|---|---|
| Given information package or checklist | - | - | - |
|----------------------------------------|---|---|---|

|                                         |   |   |   |
|-----------------------------------------|---|---|---|
| Use of information package or checklist | - | - | - |
|-----------------------------------------|---|---|---|

---

**Pain**

|                                  |     |         |      |
|----------------------------------|-----|---------|------|
| Worst pain (more than six score) | 1.5 | 0.4-5.7 | 0.51 |
|----------------------------------|-----|---------|------|

|                                                      |     |          |      |
|------------------------------------------------------|-----|----------|------|
| Pain experienced during hospital stay (general pain) | 4.7 | 1.0-21.6 | 0.05 |
|------------------------------------------------------|-----|----------|------|

|                                 |     |          |       |
|---------------------------------|-----|----------|-------|
| Pain on discharge (less than 6) | 5.0 | 1.3-18.4 | 0.016 |
|---------------------------------|-----|----------|-------|

|                             |     |         |      |
|-----------------------------|-----|---------|------|
| Medication for pain control | 0.4 | 0.1-1.7 | 0.20 |
|-----------------------------|-----|---------|------|

|                          |     |         |      |
|--------------------------|-----|---------|------|
| Pain management with ice | 0.9 | 0.2-4.2 | 0.90 |
|--------------------------|-----|---------|------|

|                    |     |         |      |
|--------------------|-----|---------|------|
| Breathing exercise | 1.9 | 0.6-6.2 | 0.30 |
|--------------------|-----|---------|------|

---

**Sleep**

|                             |     |         |      |
|-----------------------------|-----|---------|------|
| Single/shared room (single) | 1.4 | 0.4-4.8 | 0.55 |
|-----------------------------|-----|---------|------|

|                         |     |         |      |
|-------------------------|-----|---------|------|
| Quality of sleep (Poor) | 1.2 | 0.4-4.0 | 0.80 |
|-------------------------|-----|---------|------|

|                      |     |         |      |
|----------------------|-----|---------|------|
| Medication for sleep | 1.2 | 0.4-3.9 | 0.71 |
|----------------------|-----|---------|------|

|                                   |     |         |      |
|-----------------------------------|-----|---------|------|
| Feel rested when leaving hospital | 1.5 | 0.5-4.5 | 0.50 |
|-----------------------------------|-----|---------|------|

---

**Diet**

|                         |     |         |      |
|-------------------------|-----|---------|------|
| Dietary requirement met | 0.4 | 0.1-3.3 | 0.41 |
|-------------------------|-----|---------|------|

|                |     |          |      |
|----------------|-----|----------|------|
| Water in reach | 3.5 | 0.7-17.1 | 0.12 |
|----------------|-----|----------|------|

|                                      |     |         |      |
|--------------------------------------|-----|---------|------|
| Quality of food in hospital(average) | 0.5 | 0.1-4.0 | 0.52 |
|--------------------------------------|-----|---------|------|

---

|                                                     |     |         |      |
|-----------------------------------------------------|-----|---------|------|
| Discussion of medications with health care provider | 0.5 | 0.1-2.1 | 0.38 |
|-----------------------------------------------------|-----|---------|------|

|                   |     |          |      |
|-------------------|-----|----------|------|
| <i>Pharmacist</i> | 3.3 | 0.2-57.9 | 0.40 |
|-------------------|-----|----------|------|

|               |   |   |   |
|---------------|---|---|---|
| <i>Doctor</i> | - | - | - |
|---------------|---|---|---|

|              |     |          |      |
|--------------|-----|----------|------|
| <i>Nurse</i> | 1.2 | 0.1-13.3 | 0.90 |
|--------------|-----|----------|------|

|                        |   |   |   |
|------------------------|---|---|---|
| <i>Physiotherapist</i> | - | - | - |
|------------------------|---|---|---|

|                                                |     |         |      |                                                     |      |            |      |
|------------------------------------------------|-----|---------|------|-----------------------------------------------------|------|------------|------|
| <i>Other</i>                                   | -   | -       | -    | Total enablement score (less enabled)               | 1.0  | 0.3-3.3    | 0.96 |
| <i>Don't know</i>                              | -   | -       | -    |                                                     |      |            |      |
| <i>More than one</i>                           | 1.8 | 0.0-0.2 | 0.60 |                                                     |      |            |      |
| <b>Patient medication enablement</b>           |     |         |      | <b>When you got home from hospital</b>              |      |            |      |
| Better understand use of medication            | 0.4 | 0.1-3.6 | 0.44 | Recall being given information about who to contact | 0.8  | 0.2-3.8    | 0.79 |
| Feel more confident about taking medications   | 0.7 | 0.1-6.2 | 0.80 | Who were you instructed to contact?                 | 0.8  | 0.6-1.0    | 0.05 |
| Take your medications                          | 0.5 | 0.1-4.0 | 0.48 | <i>surgeon</i>                                      | -    | -          | -    |
| Total medication enablement (medication scale) | 0.9 | 0.6-1.4 | 0.59 | <i>nurse at hospital</i>                            | 0.3  | 0.0-2.7    | 0.32 |
| <b>Patient enablement</b>                      |     |         |      | <i>GP</i>                                           | 0.5  | 0.1-2.0    | 0.28 |
| Able to cope with life                         | 0.7 | 0.3-1.6 | 0.46 | <i>emergency department</i>                         | 0.3  | 0.1-2.0    | 0.27 |
| Able to understand your condition              | 0.9 | 0.4-1.2 | 0.81 | <i>other</i>                                        | -    | -          | -    |
| Able to cope with your condition               | 0.8 | 0.3-1.7 | 0.50 | Go to ED within 30 days of discharge                | 42.5 | 10.9-164.8 | 0.00 |
| Able to keep yourself healthy                  | 1.2 | 0.5-2.6 | 0.65 | <b>General Practice Questions</b>                   |      |            |      |
| Confident about your health                    | 0.6 | 0.3-1.4 | 0.25 | Regular GP practice                                 | -    | -          | -    |
| Able to help yourself                          | 1.3 | 0.6-2.8 | 0.54 | See the same doctor                                 | 0.3  | 0.0-3.0    | 0.33 |
|                                                |     |         |      | Regular appointments with GP                        | 1.2  | 0.4-3.7    | 0.76 |
|                                                |     |         |      | Discussion of plan with GP                          | 0.7  | 0.2-2.2    | 0.50 |

1  
2  
3  
4  
5  
6  
7  
8  
9  
10  
11  
12  
13  
14  
15  
16  
17  
18  
19  
20  
21  
22  
23  
24  
25  
26  
27  
28  
29  
30  
31  
32  
33  
34  
35  
36  
37  
38  
39  
40  
41  
42  
43  
44  
45  
46

| When were you advised to see GP next  |     |          |      | Length of attendance to rehab |     |         |      |
|---------------------------------------|-----|----------|------|-------------------------------|-----|---------|------|
| <i>1-6 weeks</i>                      | 1.9 | 0.2-14.7 | 0.56 | <i>One week</i>               | -   | -       | -    |
| <i>Don't know</i>                     | -   | -        | -    | <i>2 weeks</i>                | -   | -       | -    |
| Usual waiting time to see GP          |     |          |      | <i>3 weeks</i>                | -   | -       | -    |
| <i>same day</i>                       | -   | -        | -    | <i>4 weeks</i>                | 0.1 | 0.0-1.5 | 0.09 |
| <i>Within a couple of days</i>        | 0.6 | 0.2-2.1  | 0.43 | <i>&gt;4 weeks</i>            | 0.4 | 0.0-2.0 | 0.25 |
| <i>Within a week</i>                  | 0.2 | 0.0-2.1  | 0.19 | <hr/>                         |     |         |      |
| <i>1-2 weeks</i>                      | 0.4 | 0.0-4.2  | 0.48 |                               |     |         |      |
| <i>&gt;2 weeks</i>                    | -   | -        | -    |                               |     |         |      |
| How soon after surgery did you see GP |     |          |      |                               |     |         |      |
| <i>Within 1 week</i>                  | -   | -        | -    |                               |     |         |      |
| <i>2-3 weeks</i>                      | 0.5 | 0.1-1.9  | 0.33 |                               |     |         |      |
| <i>4-6 weeks</i>                      | 0.7 | 0.1-6.1  | 0.78 |                               |     |         |      |
| <i>Don't know</i>                     | 1.3 | 0.1-10.6 | 0.84 |                               |     |         |      |
| Did GP know you were in hospital      |     |          |      |                               |     |         |      |
| <hr/>                                 |     |          |      |                               |     |         |      |
| <b>Rehabilitation</b>                 |     |          |      |                               |     |         |      |
| Attendance to rehab program           | 0.1 | 0.0-0.4  | 0.00 |                               |     |         |      |
| Attendance to rehab within 5 days     | 2.2 | 0.8-5.5  | 0.11 |                               |     |         |      |



**STROBE 2007 (v4) Statement—Checklist of items that should be included in reports of *cross-sectional studies***

| Section/Topic                | Item # | Recommendation                                                                                                                                                                       | Reported on page # |
|------------------------------|--------|--------------------------------------------------------------------------------------------------------------------------------------------------------------------------------------|--------------------|
| <b>Title and abstract</b>    | 1      | (a) Indicate the study's design with a commonly used term in the title or the abstract                                                                                               | 1-3                |
|                              |        | (b) Provide in the abstract an informative and balanced summary of what was done and what was found                                                                                  | 3                  |
| <b>Introduction</b>          |        |                                                                                                                                                                                      |                    |
| Background/rationale         | 2      | Explain the scientific background and rationale for the investigation being reported                                                                                                 | 5,6                |
| Objectives                   | 3      | State specific objectives, including any prespecified hypotheses                                                                                                                     | 6                  |
| <b>Methods</b>               |        |                                                                                                                                                                                      |                    |
| Study design                 | 4      | Present key elements of study design early in the paper                                                                                                                              | 7                  |
| Setting                      | 5      | Describe the setting, locations, and relevant dates, including periods of recruitment, exposure, follow-up, and data collection                                                      | 6,7,8              |
| Participants                 | 6      | (a) Give the eligibility criteria, and the sources and methods of selection of participants                                                                                          | 6                  |
| Variables                    | 7      | Clearly define all outcomes, exposures, predictors, potential confounders, and effect modifiers. Give diagnostic criteria, if applicable                                             | 7,8                |
| Data sources/<br>measurement | 8*     | For each variable of interest, give sources of data and details of methods of assessment (measurement). Describe comparability of assessment methods if there is more than one group | 7,8                |
| Bias                         | 9      | Describe any efforts to address potential sources of bias                                                                                                                            | 9                  |
| Study size                   | 10     | Explain how the study size was arrived at                                                                                                                                            | 7                  |
| Quantitative variables       | 11     | Explain how quantitative variables were handled in the analyses. If applicable, describe which groupings were chosen and why                                                         | 8,9,10             |
| Statistical methods          | 12     | (a) Describe all statistical methods, including those used to control for confounding                                                                                                | 8,9,10             |
|                              |        | (b) Describe any methods used to examine subgroups and interactions                                                                                                                  | 8,9,10             |
|                              |        | (c) Explain how missing data were addressed                                                                                                                                          | 10                 |
|                              |        | (d) If applicable, describe analytical methods taking account of sampling strategy                                                                                                   | 10                 |
|                              |        | (e) Describe any sensitivity analyses                                                                                                                                                | 10                 |
| <b>Results</b>               |        |                                                                                                                                                                                      |                    |

|                          |     |                                                                                                                                                                                                              |               |
|--------------------------|-----|--------------------------------------------------------------------------------------------------------------------------------------------------------------------------------------------------------------|---------------|
| Participants             | 13* | (a) Report numbers of individuals at each stage of study—eg numbers potentially eligible, examined for eligibility, confirmed eligible, included in the study, completing follow-up, and analysed            | 11            |
|                          |     | (b) Give reasons for non-participation at each stage                                                                                                                                                         | Not available |
|                          |     | (c) Consider use of a flow diagram                                                                                                                                                                           |               |
| Descriptive data         | 14* | (a) Give characteristics of study participants (eg demographic, clinical, social) and information on exposures and potential confounders                                                                     | Table 1       |
|                          |     | (b) Indicate number of participants with missing data for each variable of interest                                                                                                                          | Table 1       |
| Outcome data             | 15* | Report numbers of outcome events or summary measures                                                                                                                                                         | Tables 1-3    |
| Main results             | 16  | (a) Give unadjusted estimates and, if applicable, confounder-adjusted estimates and their precision (eg, 95% confidence interval). Make clear which confounders were adjusted for and why they were included | 11,12         |
|                          |     | (b) Report category boundaries when continuous variables were categorized                                                                                                                                    | 11,12         |
|                          |     | (c) If relevant, consider translating estimates of relative risk into absolute risk for a meaningful time period                                                                                             |               |
| Other analyses           | 17  | Report other analyses done—eg analyses of subgroups and interactions, and sensitivity analyses                                                                                                               | 11,12         |
| <b>Discussion</b>        |     |                                                                                                                                                                                                              |               |
| Key results              | 18  | Summarise key results with reference to study objectives                                                                                                                                                     | 13,14,15      |
| Limitations              | 19  | Discuss limitations of the study, taking into account sources of potential bias or imprecision. Discuss both direction and magnitude of any potential bias                                                   | 15,16         |
| Interpretation           | 20  | Give a cautious overall interpretation of results considering objectives, limitations, multiplicity of analyses, results from similar studies, and other relevant evidence                                   | 16            |
| Generalisability         | 21  | Discuss the generalisability (external validity) of the study results                                                                                                                                        | 15,16         |
| <b>Other information</b> |     |                                                                                                                                                                                                              |               |
| Funding                  | 22  | Give the source of funding and the role of the funders for the present study and, if applicable, for the original study on which the present article is based                                                | 17            |

\*Give information separately for cases and controls in case-control studies and, if applicable, for exposed and unexposed groups in cohort and cross-sectional studies.

**Note:** An Explanation and Elaboration article discusses each checklist item and gives methodological background and published examples of transparent reporting. The STROBE checklist is best used in conjunction with this article (freely available on the Web sites of PLoS Medicine at <http://www.plosmedicine.org/>, Annals of Internal Medicine at <http://www.annals.org/>, and Epidemiology at <http://www.epidem.com/>). Information on the STROBE Initiative is available at [www.strobe-statement.org](http://www.strobe-statement.org).
