# Supplementary material for: Understanding factors affecting 30-day unplanned readmissions for patients undergoing total knee arthroplasty (TKA): the ACT Transition from Hospital to Home Orthopaedics Survey
Source: PubMed Central journal article supplement — BMJ Open. 2022 Apr 10;12(4):e053831. doi: 10.1136/bmjopen-2021-053831 (PMC9003601; doi:10.1136/bmjopen-2021-053831), 2022-04-10
Supplement: bmjopen-2021-053831supp001.pdf [file bmjopen-2021-053831supp001.pdf]

Supplementary table 1. Results of univariate logistic regression analyses of variables associated with unplanned 30-day readmission in patients who received total knee arthroplasty

| <i>Variables</i>                            | <i>Odds Ratio</i> |               |                |
|---------------------------------------------|-------------------|---------------|----------------|
|                                             | <i>OR</i>         | <i>95% CI</i> | <i>p-value</i> |
| Public vs Private                           | 4.2               | 1.2-14.2      | 0.02           |
| <b>Comorbidities</b>                        |                   |               |                |
| Arthritis <sup>#</sup>                      | 1.8               | 0.2-14.6      | 0.56           |
| Osteoporosis                                | 1.7               | 0.4-6.7       | 0.43           |
| Asthma                                      | 0.8               | 0.2-3.8       | 0.80           |
| COPD, ARDS, emphysema                       | 1.8               | 0.2-14.9      | 0.58           |
| Angina                                      | -                 | -             | -              |
| Congestive heart failure (or heart disease) | 1.9               | 0.2-16.2      | 0.53           |
| Heart attack                                | -                 | -             | -              |
| Neurological disease                        | -                 | -             | -              |
| Stroke or TIA                               | 3.6               | 0.7-18.2      | 0.11           |
| Peripheral vascular disease                 | -                 | -             | -              |
| Diabetes type I and II                      | 2.3               | 0.6-9.1       | 0.21           |
| Upper GI disease                            | 0.6               | 0.2-2.4       | 0.52           |
| Depression                                  | 0.6               | 0.1-2.9       | 0.55           |
| Anxiety or panic disorders                  | 1.6               | 0.4-6.3       | 0.46           |
| Visual impairment                           | 1.0               | 0.3-3.7       | 0.98           |
| Hearing impairment                          | 1.3               | 0.3-6.0       | 0.80           |
| Degenerative disc disease                   | 1.6               | 0.5-5.4       | 0.44           |
| <b>Morbidity scale</b>                      |                   |               |                |
| 0                                           | -                 | -             | -              |
| 1                                           | 0.6               | 0.1-2.5       | 0.50           |
| 2                                           | 0.4               | 0.1-2.0       | 0.27           |
| 3 or more                                   | -                 | -             | -              |
| <b>Self-Rated Health</b>                    |                   |               |                |
| Poor                                        | -                 | -             | -              |
| Fair                                        | 0.3               | 0.0-3.0       | 0.3            |
| Good                                        | 0.2               | 0.0-2.0       | 0.1            |
| Very good                                   | 0.1               | 0.0-1.0       | 0.1            |

|                                                      |     |          |       |
|------------------------------------------------------|-----|----------|-------|
| <i>Excellent</i>                                     | -   | -        | -     |
| <b>Before you went to hospital</b>                   |     |          |       |
| Invited to attend session by surgeon                 | 0.5 | 0.1-1.5  | 0.21  |
| Attended information session                         | 1.0 | 0.3-3.2  | 0.99  |
| Usefulness of pre-surgery information session        | 0.7 | 0.3-1.9  | 0.53  |
| <i>Not very useful</i>                               | -   | -        | -     |
| <i>Moderately useful</i>                             | 0.1 | 0.0-1.8  | 0.13  |
| <i>Very useful</i>                                   | 0.3 | 0.0-1.8  | 0.21  |
| Given information package or checklist               | -   | -        | -     |
| Use of information package or checklist              | -   | -        | -     |
| <b>Pain</b>                                          |     |          |       |
| Worst pain (more than six score)                     | 1.5 | 0.4-5.7  | 0.51  |
| Pain experienced during hospital stay (general pain) | 4.7 | 1.0-21.6 | 0.05  |
| Pain on discharge (less than 6)                      | 5.0 | 1.3-18.4 | 0.016 |

|                                                     |     |          |      |
|-----------------------------------------------------|-----|----------|------|
| Medication for pain control                         | 0.4 | 0.1-1.7  | 0.20 |
| Pain management with ice                            | 0.9 | 0.2-4.2  | 0.90 |
| Breathing exercise                                  | 1.9 | 0.6-6.2  | 0.30 |
| <b>Sleep</b>                                        |     |          |      |
| Single/shared room (single)                         | 1.4 | 0.4-4.8  | 0.55 |
| Quality of sleep (Poor)                             | 1.2 | 0.4-4.0  | 0.80 |
| Medication for sleep                                | 1.2 | 0.4-3.9  | 0.71 |
| Feel rested when leaving hospital                   | 1.5 | 0.5-4.5  | 0.50 |
| <b>Diet</b>                                         |     |          |      |
| Dietary requirement met                             | 0.4 | 0.1-3.3  | 0.41 |
| Water in reach                                      | 3.5 | 0.7-17.1 | 0.12 |
| Quality of food in hospital(average)                | 0.5 | 0.1-4.0  | 0.52 |
| Discussion of medications with health care provider | 0.5 | 0.1-2.1  | 0.38 |
| <i>Pharmacist</i>                                   | 3.3 | 0.2-57.9 | 0.40 |
| <i>Doctor</i>                                       | -   | -        | -    |
| <i>Nurse</i>                                        | 1.2 | 0.1-13.3 | 0.90 |
| <i>Physiotherapist</i>                              | -   | -        | -    |

|                                                |     |         |      |                                                     |      |            |      |
|------------------------------------------------|-----|---------|------|-----------------------------------------------------|------|------------|------|
| <i>Other</i>                                   | -   | -       | -    | Total enablement score (less enabled)               | 1.0  | 0.3-3.3    | 0.96 |
| <i>Don't know</i>                              | -   | -       | -    |                                                     |      |            |      |
| <i>More than one</i>                           | 1.8 | 0.0-0.2 | 0.60 | <b>When you got home from hospital</b>              |      |            |      |
| <b>Patient medication enablement</b>           |     |         |      | Recall being given information about who to contact | 0.8  | 0.2-3.8    | 0.79 |
| Better understand use of medication            | 0.4 | 0.1-3.6 | 0.44 | Who were you instructed to contact?                 | 0.8  | 0.6-1.0    | 0.05 |
| Feel more confident about taking medications   | 0.7 | 0.1-6.2 | 0.80 | <i>surgeon</i>                                      | -    | -          | -    |
| Take your medications                          | 0.5 | 0.1-4.0 | 0.48 | <i>nurse at hospital</i>                            | 0.3  | 0.0-2.7    | 0.32 |
| Total medication enablement (medication scale) | 0.9 | 0.6-1.4 | 0.59 | <i>GP</i>                                           | 0.5  | 0.1-2.0    | 0.28 |
| <b>Patient enablement</b>                      |     |         |      | <i>emergency department</i>                         | 0.3  | 0.1-2.0    | 0.27 |
| Able to cope with life                         | 0.7 | 0.3-1.6 | 0.46 | <i>other</i>                                        | -    | -          | -    |
| Able to understand your condition              | 0.9 | 0.4-1.2 | 0.81 | Go to ED within 30 days of discharge                | 42.5 | 10.9-164.8 | 0.00 |
| Able to cope with your condition               | 0.8 | 0.3-1.7 | 0.50 | <b>General Practice Questions</b>                   |      |            |      |
| Able to keep yourself healthy                  | 1.2 | 0.5-2.6 | 0.65 | Regular GP practice                                 | -    | -          | -    |
| Confident about your health                    | 0.6 | 0.3-1.4 | 0.25 | See the same doctor                                 | 0.3  | 0.0-3.0    | 0.33 |
| Able to help yourself                          | 1.3 | 0.6-2.8 | 0.54 | Regular appointments with GP                        | 1.2  | 0.4-3.7    | 0.76 |
|                                                |     |         |      | Discussion of plan with GP                          | 0.7  | 0.2-2.2    | 0.50 |

|                                       |     |          |      |                               |     |         |      |
|---------------------------------------|-----|----------|------|-------------------------------|-----|---------|------|
| When were you advised to see GP next  |     |          |      | Length of attendance to rehab |     |         |      |
| <i>1-6 weeks</i>                      | 1.9 | 0.2-14.7 | 0.56 | <i>One week</i>               | -   | -       | -    |
| <i>Don't know</i>                     | -   | -        | -    | <i>2 weeks</i>                | -   | -       | -    |
| Usual waiting time to see GP          |     |          |      | <i>3 weeks</i>                | -   | -       | -    |
| <i>same day</i>                       | -   | -        | -    | <i>4 weeks</i>                | 0.1 | 0.0-1.5 | 0.09 |
| <i>Within a couple of days</i>        | 0.6 | 0.2-2.1  | 0.43 | <i>&gt;4 weeks</i>            | 0.4 | 0.0-2.0 | 0.25 |
| <i>Within a week</i>                  | 0.2 | 0.0-2.1  | 0.19 | <hr/>                         |     |         |      |
| <i>1-2 weeks</i>                      | 0.4 | 0.0-4.2  | 0.48 |                               |     |         |      |
| <i>&gt;2 weeks</i>                    | -   | -        | -    |                               |     |         |      |
| How soon after surgery did you see GP |     |          |      |                               |     |         |      |
| <i>Within 1 week</i>                  | -   | -        | -    |                               |     |         |      |
| <i>2-3 weeks</i>                      | 0.5 | 0.1-1.9  | 0.33 |                               |     |         |      |
| <i>4-6 weeks</i>                      | 0.7 | 0.1-6.1  | 0.78 |                               |     |         |      |
| <i>Don't know</i>                     | 1.3 | 0.1-10.6 | 0.84 |                               |     |         |      |
| Did GP know you were in hospital      | -   | -        | -    |                               |     |         |      |
| <hr/>                                 |     |          |      |                               |     |         |      |
| <b>Rehabilitation</b>                 |     |          |      |                               |     |         |      |
| Attendance to rehab program           | 0.1 | 0.0-0.4  | 0.00 |                               |     |         |      |
| Attendance to rehab within 5 days     | 2.2 | 0.8-5.5  | 0.11 |                               |     |         |      |
